# Supplementary material for: Homoleptic cerium tris(dialkylamido)imidophosphorane guanidinate complexes
Source: Royal Society of Chemistry journal article supplement (doi:10.1039/d0dt03472j), 2020-01-01
Supplement: d0dt03472j1.pdf [file d0dt03472j1.pdf]

Supporting Information for:

Homoleptic Cerium Tris(dialkylamido)imidophosphorane Guanidinate Complexes

Luis M. Aguirre Quintana,<sup>a</sup> Ningxin Jiang,<sup>a</sup> John Bacsa,<sup>a</sup> and Henry S. La Pierre<sup>\*ab</sup>

<sup>a</sup> Department of Chemistry and Biochemistry, Georgia Institute of Technology, Atlanta, Georgia 30332-0400, United States

*E-Mail: hsl@gatech.edu*

<sup>b</sup> Nuclear and Radiological Engineering Program, Georgia Institute of Technology, Atlanta, Georgia 30332-0400, United States

Table of Contents

|                                                       |           |
|-------------------------------------------------------|-----------|
| <b>General Considerations</b> .....                   | <b>2</b>  |
| <b>Synthetic Procedures</b> .....                     | <b>3</b>  |
| <b>NMR Spectra of Reported Compounds</b> .....        | <b>6</b>  |
| <b>UV-vis-NIR Spectroscopy</b> .....                  | <b>19</b> |
| <b>Excitation and Emission Spectra</b> .....          | <b>21</b> |
| <b>Cyclic Voltammetry</b> .....                       | <b>22</b> |
| <b>Ce L<sub>3</sub>-Edge XANES Spectroscopy</b> ..... | <b>25</b> |
| <b>Crystallographic Analyses</b> .....                | <b>56</b> |
| <b>References</b> .....                               | <b>81</b> |

## General Considerations

Unless otherwise stated, all reagents were obtained from commercial suppliers, and the syntheses and manipulations were conducted under argon with exclusion of dioxygen ( $O_2$ ) and  $H_2O$  using Schlenk techniques or in an inert atmosphere box (Vigor) under a dinitrogen ( $<0.1$  ppm  $O_2/H_2O$ ) atmosphere. All glassware was stored in an oven over-night ( $>8$  h) at a temperature of ca.  $160^\circ C$  prior to use. Celite and molecular sieves were dried under vacuum at a temperature  $>250^\circ C$  for a minimum of 24 h.  $d_8$ -THF was stored over 3 Å molecular sieves prior to use. Diethyl ether, *n*-pentane, *n*-hexane, benzene, toluene, and tetrahydrofuran (THF) were purged with UHP-grade argon (Airgas) and passed through columns containing Q-5 and molecular sieves in a solvent purification system (JC Meyer Solvent Systems). All solvents in the glovebox were stored in bottles over 3 Å molecular sieves. The reagents  $CeCl_3(THF)_4$  and  $K[NP(pip)_3]$  were prepared by published procedures.<sup>1, 2</sup> NMR spectra were obtained on a Bruker Avance III 400 MHz spectrometer at 298 K, unless otherwise noted.  $^1H$ ,  $^{13}C\{^1H\}$ , and  $^{31}P\{^1H\}$  NMR chemical shifts are reported in  $\delta$ , parts per million. All NMR samples were prepared in  $d_8$ -THF (unless otherwise noted) and  $^1H$  NMR are references to the residual  $^1H$  resonances of  $d_8$ -THF.<sup>3</sup>  $^{13}C\{^1H\}$  NMR are referenced to the  $^{13}C\{^1H\}$  resonance of the  $d_8$ -THF.<sup>3</sup> The peak position is listed, followed by the peak multiplicity, integration value, and proton assignment, where applicable. The multiplicity and shape are indicated by one or more of the following abbreviations: s (singlet); d (doublet); t (triplet); q (quartet); m (multiplet); br (broad). Elemental analyses were determined at Robertson Microlit Laboratories (Ledgewood, NJ) and University of California, Berkeley, Microanalytical Facility (Berkeley, CA). Infrared (IR) samples were taken on a Bruker ALPHA FTIR spectrometer from 400 to  $4000\text{ cm}^{-1}$ . IR samples were prepared as Nujol mulls sandwiched between two KBr plates. The peaks are listed in wavenumber [ $\text{cm}^{-1}$ ] and intensity by using the following abbreviations: vw (very weak); w (weak); m (medium); s (strong); vs (very strong); br (broad). UV/visible/NIR spectroscopy was performed in Teflon-valve sealed quartz cuvettes with a 1 cm path length on a Hitachi UH4150 UV-vis-NIR scanning spectrophotometer between 2400-200 nm.

## Synthetic Procedures

### Synthesis of $[\text{K}(\text{THF})_2^{\text{Cy}}\text{GNP}(\text{pip})_3]_2$ (1-K)

Inside a glovebox, 10 mL of THF was added to a 50 mL round-bottomed flask charged with N,N'-dicyclohexylcarbodiimide (0.699 g, 3.385 mmol, 1 equiv.) and a stir bar. A solution of  $\text{K}[\text{NP}(\text{pip})_3]$  (1.139 g, 3.385 mmol, 1 equiv.) in 15 mL of THF was then added to the flask and the reaction mixture was stirred for 24 hours. The mixture was filtered through a pipet packed with glass filter paper and Celite. The filtrate was reduced *in vacuo* to a residue and triturated three times with 4-6 mL of pentane. The residue was then extracted into approximately 20 mL of THF and filtered through pipet packed with glass filter paper and Celite. The filtrate was then concentrated *in vacuo* until saturated and placed in the freezer at  $-35\text{ }^\circ\text{C}$  for 24 hours, during which time, colorless crystals formed. Decantation and removal of volatiles yielded the title compound in 89% yield (1.85 g). The product was recrystallized from THF at  $-35\text{ }^\circ\text{C}$  to provide X-ray quality crystals.  $^1\text{H}$  NMR (400.13 MHz,  $d_8$ -THF, 295 K):  $\delta$  3.62 (m, THF), 1.77 (m, THF), 3.21 (br, m, 2H, cyclohexyl methyne C-H, A), 3.16 (s, 12 H, piperidinyll methylene C-H, E), 1.62 (br, m, 8H, cyclohexyl methylene C-H, B), 1.54 (br, m, 6H, piperidinyll methylene C-H, G), 1.50 (br, m, 12H, piperidinyll methylene C-H, F), 1.33 (br, m, 12H cyclohexyl methylene C-H, C), 1.18 (br, m, 4H, cyclohexyl methylene C-H, D): the series of overlapped features from 1.62 ppm to 1.18 ppm integrates to 38 protons corresponding to methylenes of the ligand labeled B, C, D, F, and G as depicted in Figure S1.  $^{31}\text{P}\{^1\text{H}\}$  NMR (161.98 MHz,  $d_8$ -THF, 295 K):  $\delta$  -13.13 (br, s).  $^{13}\text{C}\{^1\text{H}\}$  NMR (100.62 MHz,  $d_8$ -THF, 295 K):  $\delta$  55.41 (br, s, cyclohexyl methyne C-H, A), 47.07 (s, piperidinyll methylene C-H, E), 39.07 (br, s, cyclohexyl methylene C-H, D), 27.69 (d, piperidinyll methylene C-H, F), 27.18 (br, s, cyclohexyl methylene C-H, B; and cyclohexyl methylene C-H, C), 26.08 (s, piperidinyll methylene C-H, G). The N=C=N guanidinate carbon  $^{13}\text{C}\{^1\text{H}\}$  peak is not observed. IR ( $\text{cm}^{-1}$ ):  $\nu$  1582 (vw), 1337 (s), 1298 (w), 1259 (m), 1157 (s), 1123 (s), 1062 (vs), 1027(s), 988 (vw), 944 (vs), 885 (vw), 854 (vw), 835 (vw), 800 (w), 660 (vw). Elem. Anal. Found (calculated) for  $\text{C}_{36}\text{H}_{68}\text{N}_6\text{PO}_2\text{K}$ : C 58.49 (62.50), H 9.17 (9.84), N 13.28 (13.67). Multiple burns varied significantly from calculated (at both Berkeley and Microlit) – as evidenced by the SC-XRD analysis the ligated THF's are loosely bound and introduce significant variability.  $^1\text{H}$  and  $^{13}\text{C}$  NMR suggest one THF per potassium remains after isolation under reduced pressure. Combustion analyses consistently provided low carbon on multiple burns.

### Synthesis of $[\text{Ce}(\text{CyGNP}(\text{pip})_3)_3]$ (1-Ce)

Inside a glovebox, 5 mL of THF and a stir bar were added to a 20 mL scintillation vial charged with  $\text{CeCl}_3(\text{THF})_4$  (0.139 g, 0.259 mmol, 1 equiv.). A solution of  $[\text{K}(\text{THF})_2^{\text{Cy}}\text{GNP}(\text{pip})_3]$  (0.479 g, 0.697 mmol, 2.7 equiv.) in 10 mL of THF was added and the mixture allowed to stir for 32 hours. The mixture was filtered through a pipet packed with glass filter paper and Celite. The filtrate was reduced *in vacuo* to a residue and triturated three times with 2-3 mL of pentane. The residue was then extracted into approximately 15 mL of pentane and filtered through pipet packed with glass filter paper and Celite. The filtrate was then concentrated *in vacuo* until saturated and placed in the freezer at  $-35\text{ }^\circ\text{C}$  for 24 hours, during which time, yellow-green crystals formed. Decantation and removal of volatiles yielded the title compound in 84% yield (0.322 g). The product was recrystallized from pentane at  $-35\text{ }^\circ\text{C}$  to provide X-ray quality crystals.

This compound appears to exhibit dissymmetry, and the cyclohexyl ring protons appear to be diastereotopic. Compounded by the paramagnetic broadening arising from the  $4f^1$   $\text{Ce}^{3+}$  center, these effects result in broadening of several low intensity peaks into the baseline.  $^1\text{H}$  NMR (400.13 MHz,  $d_8$ -THF, 295 K):  $\delta$  5.85 (s, 36H, piperidinyll methylene C-H, E), 2.72 (s, 36H, piperidinyll methylene C-H, F), 2.41 (s, 16H, piperidinyll methylene C-H, G), 0.29 (br, s, 12H cyclohexyl methylene C-H,  $\text{H}_F + \text{H}_G$ ). The peaks at 11.20 (br-s), -0.73 (br-s), -1.36 (br-s), -4.34 (br-s) correspond to unassigned cyclohexyl protons. A total of 30 cyclohexyl protons are paramagnetically broadened to the baseline.  $^{31}\text{P}\{^1\text{H}\}$  NMR (161.97 MHz,  $d_8$ -THF, 295 K):  $\delta$  0.84 (s).  $^{13}\text{C}\{^1\text{H}\}$  NMR (100.62 MHz,  $d_8$ -THF, 295 K):  $\delta$  49.58 (s, piperidinyll methylene C-H, E), 29.04 (d, piperidinyll methylene C-H, F), 26.97 (br, s, piperidinyll methylene C-H, G), 23.89 (br, m, cyclohexyl methylene C-H,  $\text{H}_F + \text{H}_G$ ). The peaks at  $\delta$  56.89 (s), 50.03 (br-m), 34.89 (br-s), 32.12 (br-m), 29.36 (br-s), 27.62 (br-s), 23.38 (s) correspond to unassigned cyclohexyl methylene, methyne, and guanidinate carbons. IR ( $\text{cm}^{-1}$ ):  $\nu$  1353 (vw), 1338 (vw), 1267 (s), 1235 (vw), 1214 (vs), 1186 (vw), 1161 (s), 1120 (s), 1061 (vs), 1026 (m), 991 (vw), 948 (vs), 896 (w), 886 (w), 853 (w), 833 (vw), 785 (s), 661 (m). Elem. Anal. Found (calculated) for  $\text{C}_{84}\text{H}_{156}\text{N}_{18}\text{P}_3\text{Ce}$ : C 61.09 (61.10), H 9.81 (9.52), N 14.92 (15.27).

### Synthesis of $[\text{Ce}(\text{CyGNP}(\text{pip})_3)_3]\text{BPh}_4$ , 2-Ce

Inside a glovebox, 5 mL of  $\text{Et}_2\text{O}$  and a stir bar were added to a 20 mL scintillation vial charged with  $\text{AgBPh}_4$  (0.032 g, 0.077 mmol, 1 equiv.). A solution of  $[\text{Ce}(\text{CyGNP}(\text{pip})_3)_3]$  (0.128 g, 0.077 mmol, 1 equiv.) in 10 mL of  $\text{Et}_2\text{O}$  was added and the reaction mixture allowed to stir for 32 hours. The reaction mixture was placed in the freezer at  $-35^\circ\text{C}$  for 4 hours. The mixture was then filtered through a fine porosity sintered-glass frit. The solid residue was washed three times with 2-3 mL of pentane. The residue was then extracted into approximately 20 mL of  $\text{Et}_2\text{O}$  and filtered again through a fine porosity sintered-glass frit. The filtrate was then concentrated *in vacuo* until saturated and placed in the freezer at  $-35^\circ\text{C}$  for 24 hours, during which time, dark blue crystals formed. Decantation and removal of volatiles yielded the title compound in 81% yield (0.123 g). The product was recrystallized from  $\text{Et}_2\text{O}$  at  $-35^\circ\text{C}$  to provide X-ray quality crystals.  $^1\text{H}$  NMR (400.13 MHz,  $d_8$ -THF, 295 K):  $\delta$  3.38 (q, 4 H,  $\text{Et}_2\text{O}-\text{CH}_2$ ), 1.12 (t, 6 H,  $\text{Et}_2\text{O}-\text{CH}_3$ ),  $\delta$  7.26 (m, 8 H, phenyl C-H, X), 6.83 (t, 8H, phenyl C-H, Y), 6.68 (t, 4 H, phenyl C-H, Z), 4.05 (m, 6 H, cyclohexyl methyne C-H, A), 3.10 (br, m, 36 H, piperidinyll methylene C-H, E) 1.88 (br, m, 24 H, cyclohexyl methylene C-H, B), 1.67 (br, m, 12H, cyclohexyl methylene C-H, D) 1.59 (br, m, 18H, cyclohexyl methylene C-H, G), 1.54 (br, m, 36H, piperidinyll methylene C-H, F), 1.29 (br, m; 24H, cyclohexyl methylene C-H, C): The series of overlapped features from 1.70 ppm to 1.16 ppm integrated to 90 protons corresponding to methylenes of the ligand labeled C, D, F, and G as shown in Figure S7.  $^1\text{H}$  NMR indicates one molecule of residual  $\text{Et}_2\text{O}$ .  $^{31}\text{P}\{^1\text{H}\}$  NMR (161.97 MHz,  $d_8$ -THF, 295 K):  $\delta$  -1.03 (s).  $^{13}\text{C}\{^1\text{H}\}$  NMR (100.62 MHz,  $d_8$ -THF, 295 K):  $\delta$  163.01 (d, B-C,  $[\text{BPh}_4]^{1-}$ , K), 137.03 (s, phenyl C-H, X), 125.37 (s, phenyl C-H, Y), 121.43 (s, phenyl C-H, Z), 100.78 (s,  $\text{N}=\text{C}=\text{N}$  guanidinate carbon., J), 57.94 (s, cyclohexyl methyne C-H, A), 47.00 (s, piperidinyll methylene C-H, E), 39.83 (s, cyclohexyl methylene C-H, B), 38.04 (s, cyclohexyl methylene C-H, D), 27.15 (d, piperidinyll methylene C-H, F), 26.82 (d, cyclohexyl methylene C-H, C), 25.46 (s, piperidinyll methylene C-H, G).  $^{11}\text{B}$  NMR (128.38 MHz,  $d_8$ -THF, 295 K):  $\delta$  -8.68 (s,  $[\text{BPh}_4]^{1-}$ ). IR ( $\text{cm}^{-1}$ ):  $\nu$  1579 (vw), 1261 (w), 1209 (m),

1156 (m), 1111 (m), 1059 (m), 1024 (w), 947 (s), 896 (vw), 833 (vw), 800 (m), 768 (m), 701 (vw), 659 (vw). Elem. Anal. Found (calculated) for  $C_{112}H_{186}N_{18}P_3BOCe$  (including one  $Et_2O$ ): C 64.35 (65.75), H 9.18 (9.17), N 11.85 (12.33). Combustion analyses consistently provided low carbon on multiple burns (at both UC-Berkeley and Microlit).

# NMR Spectra of Reported Compounds

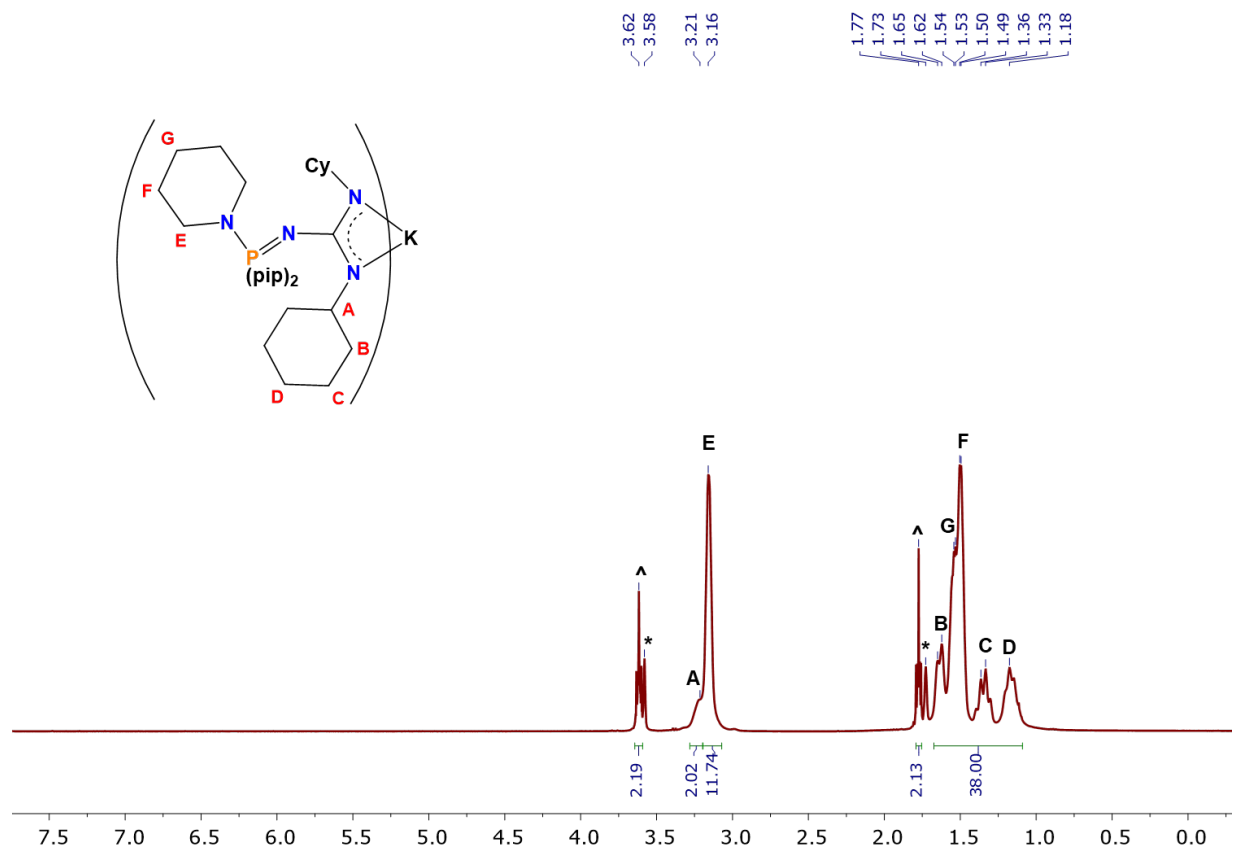

**Figure S1.** <sup>1</sup>H NMR of **1-K** (400.13 MHz, *d*<sub>8</sub>-THF, 295 K). C<sub>4</sub>D<sub>7</sub>HO noted by \*. Residual THF noted by ^.

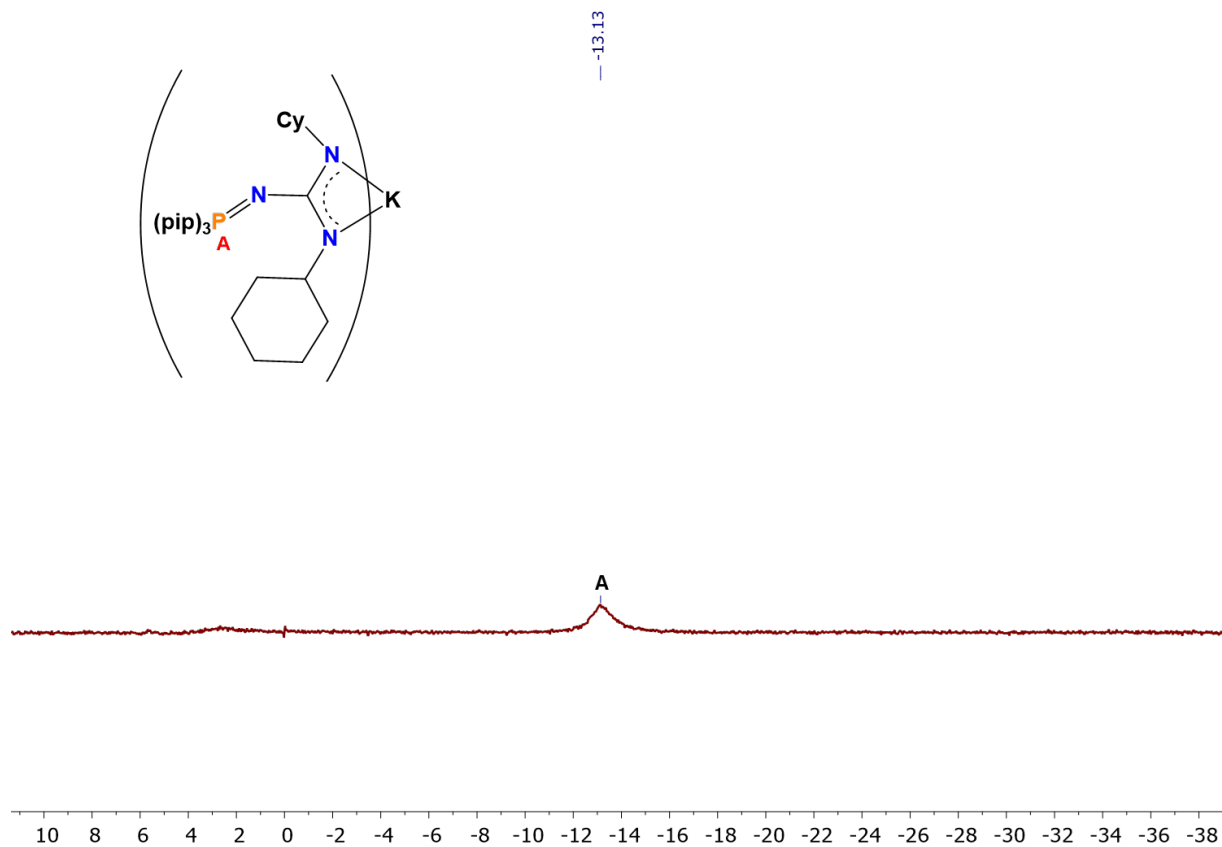

**Figure S2.**  $^{31}\text{P}\{^1\text{H}\}$  NMR of **1-K** (161.98 MHz,  $d_8$ -THF, 295 K).

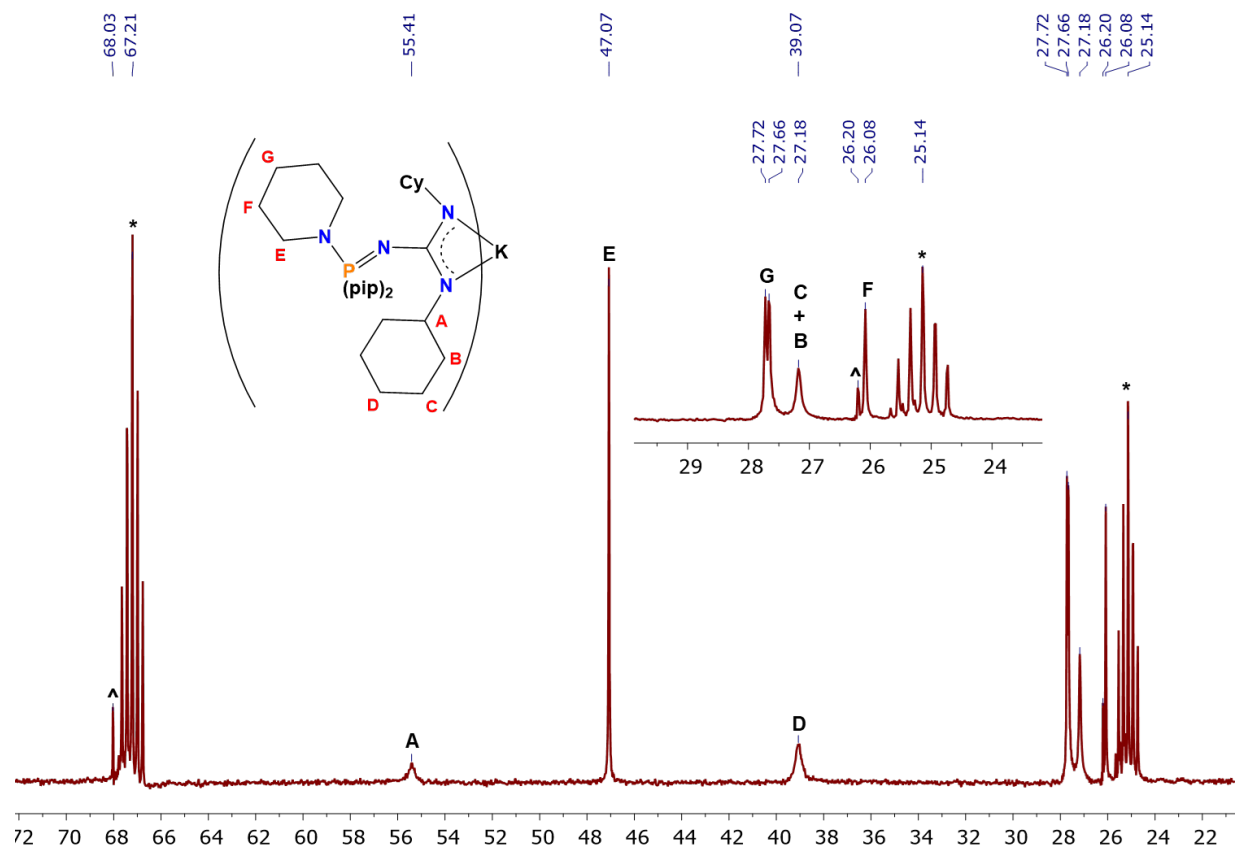

**Figure S3.**  $^{13}C\{^1H\}$  NMR of **1-K** (100.62 MHz,  $d_8$ -THF, 295 K).  $C_4D_7HO$  noted by \*. Residual THF noted by ^.



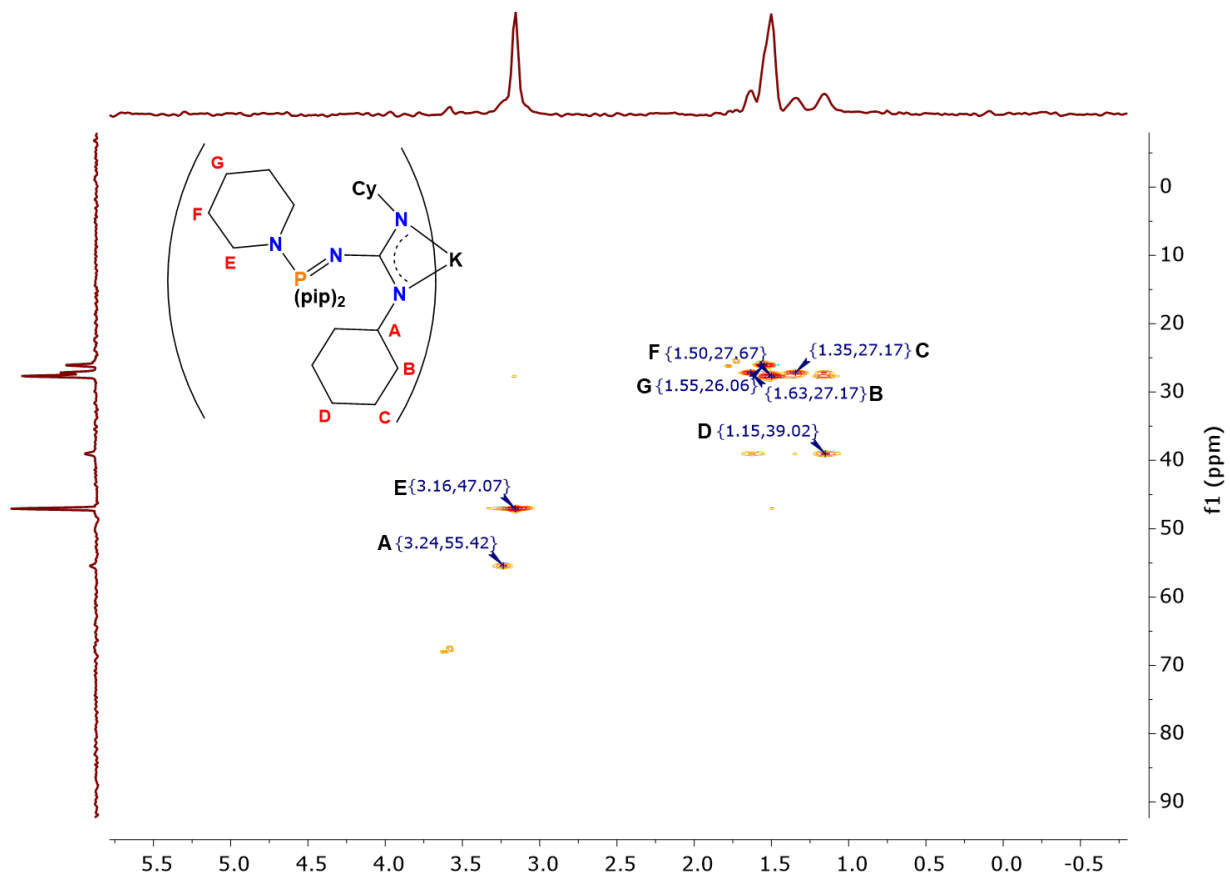

**Figure S4.** HSQC NMR contour plot of **1-K** (400.13 MHz,  $d_8$ -THF, 295 K). The X-axis (f2) corresponds to the  $^1\text{H}$  NMR spectrum of **1-K** and the Y-axis (f1) corresponds to the  $^{13}\text{C}\{^1\text{H}\}$  NMR spectrum of **1-K**.

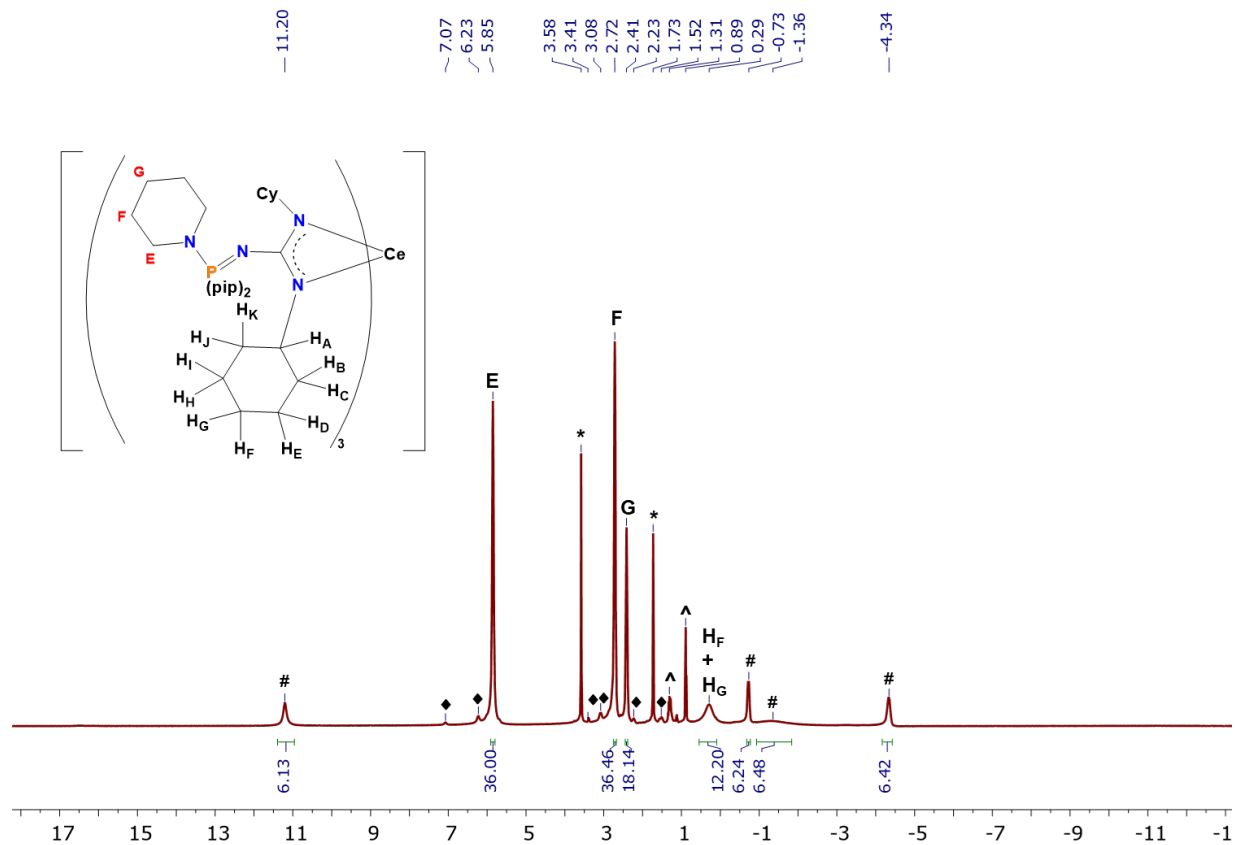

**Figure S5.** <sup>1</sup>H NMR of **1-Ce** in (400.13 MHz, *d*<sub>8</sub>-THF, 295 K). C<sub>4</sub>D<sub>7</sub>HO noted by \*. Residual n-pentane noted by ^. Unassigned cyclohexyl C-H signals noted by #. ♦ is unknown.

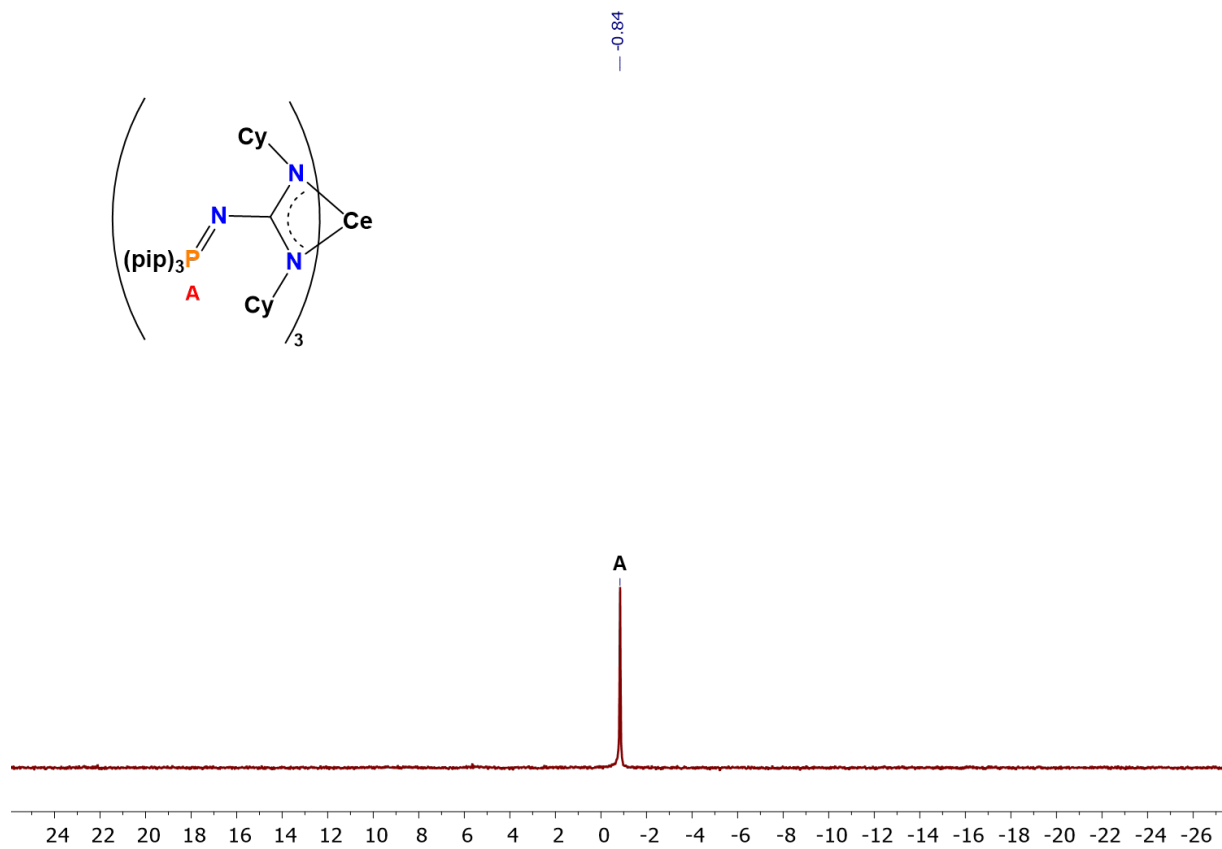

**Figure S6.**  $^{31}\text{P}\{^1\text{H}\}$  NMR of **1-Ce** in (161.97 MHz,  $d_8$ -THF, 295 K).

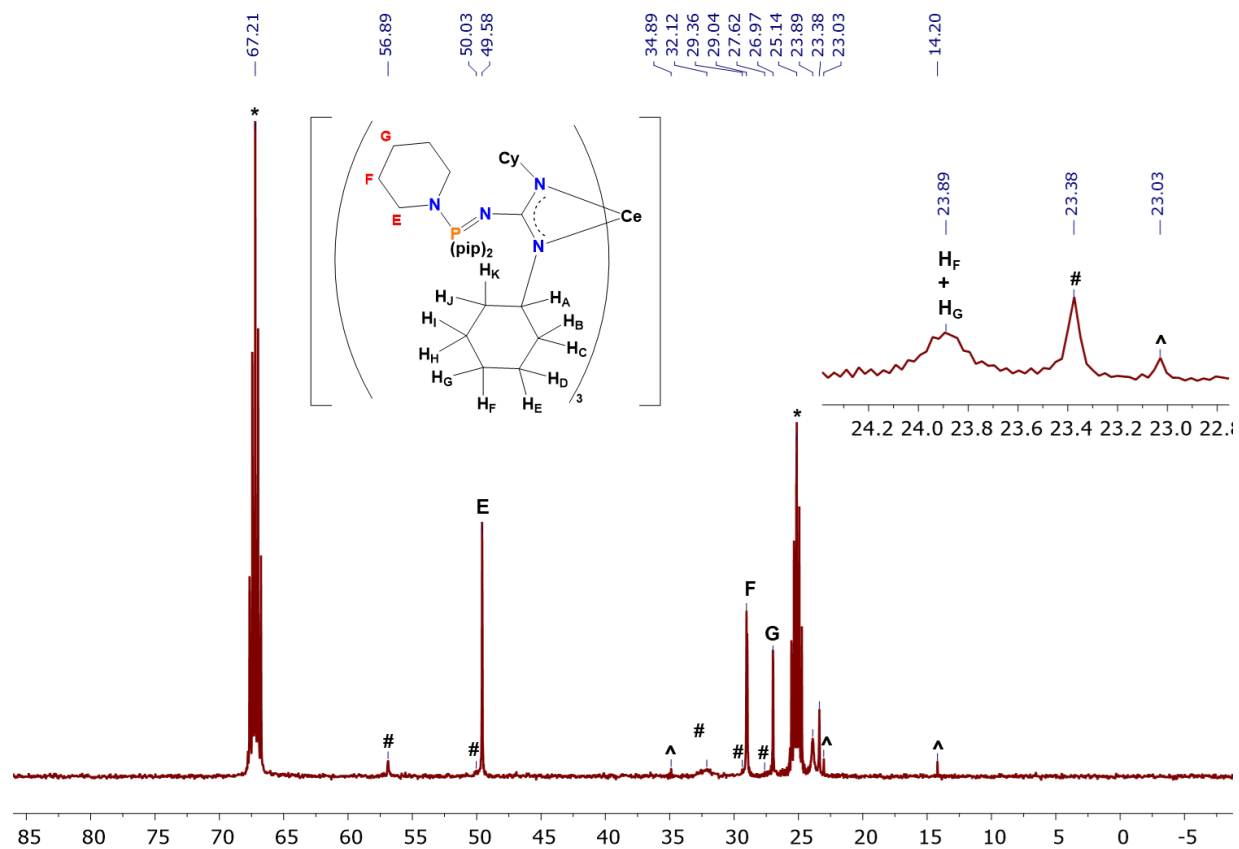

**Figure S7.**  $^{13}\text{C}\{^1\text{H}\}$  NMR of **1-Ce** (100.62 MHz,  $d_8$ -THF, 295 K).  $\text{C}_4\text{D}_7\text{HO}$  noted by \*. Residual n-pentane noted by  $\wedge$ . Unassigned cyclohexyl and guanidinate carbon signals noted by #.

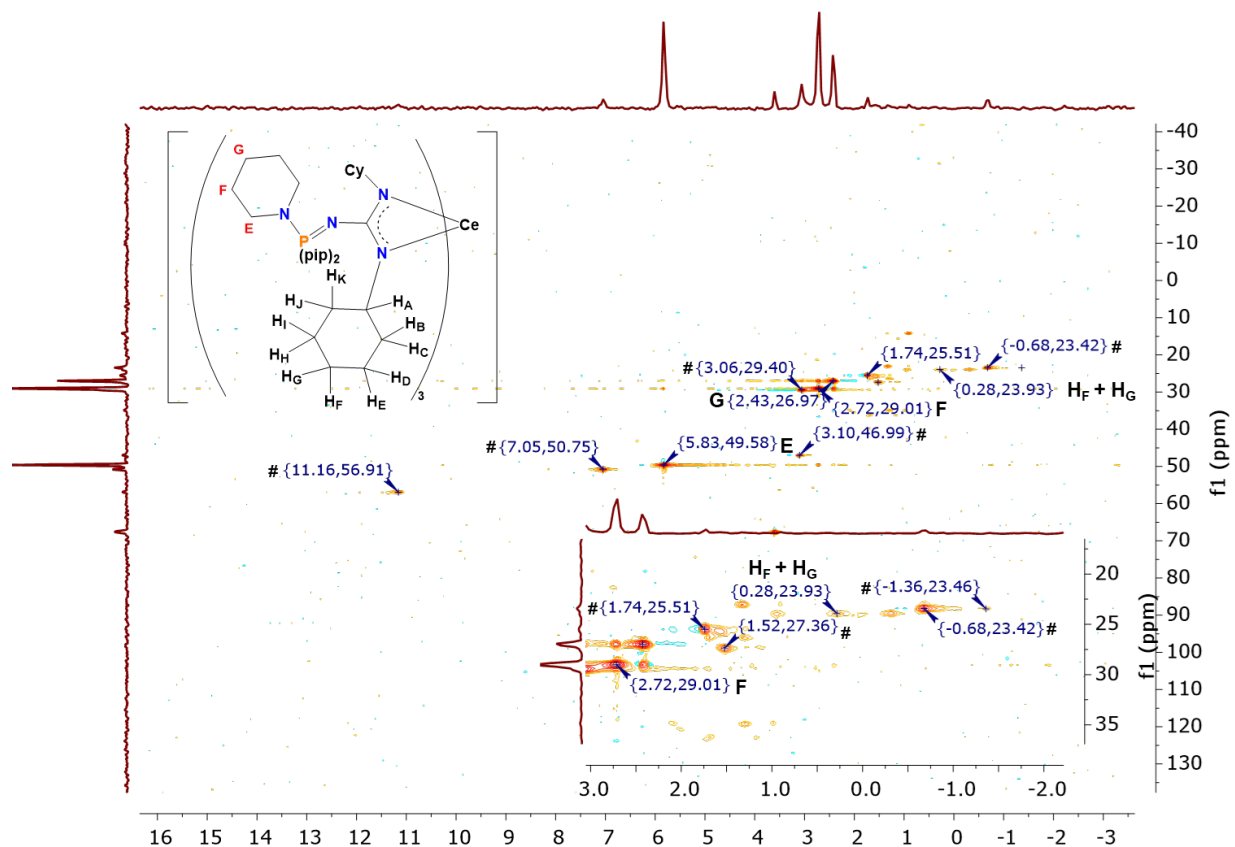

**Figure S8.** HSQC NMR Contour plot of **1-Ce** in (400.13 MHz,  $d_8$ -THF, 295 K). The X-axis (f2) corresponds to the  $^1\text{H}$  NMR spectrum of **1-Ce** and the Y-axis (f1) corresponds to the  $^{13}\text{C}\{^1\text{H}\}$  NMR spectrum of **1-Ce**. Unassigned cyclohexyl C-H signals noted by #.

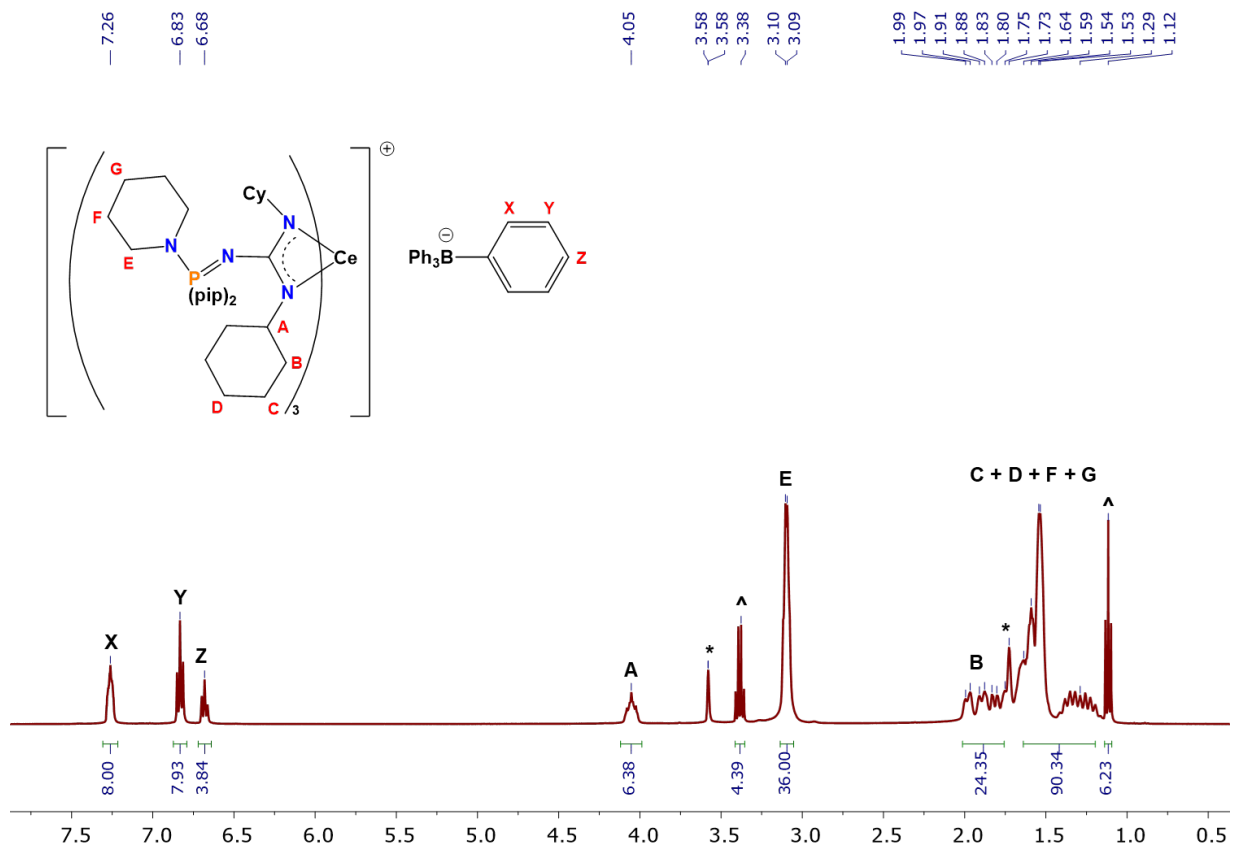

**Figure S9.**  $^1\text{H}$  NMR of **2-Ce** (400.13 MHz,  $d_8$ -THF, 295 K).  $\text{C}_4\text{D}_7\text{HO}$  noted by \*. Residual  $\text{Et}_2\text{O}$  noted by ^.

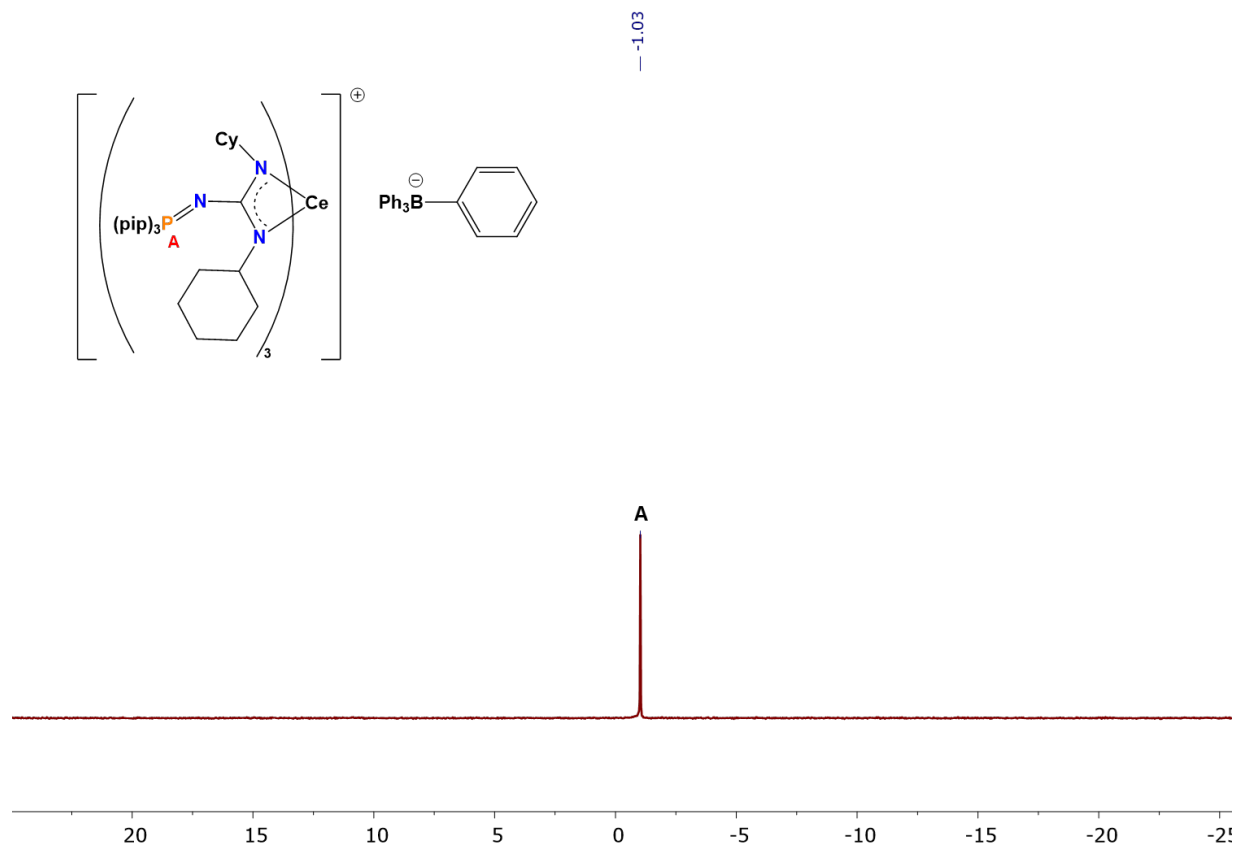

**Figure S10.**  $^{31}\text{P}\{^1\text{H}\}$  NMR of **2-Ce** (161.97 MHz,  $d_8$ -THF, 295 K).





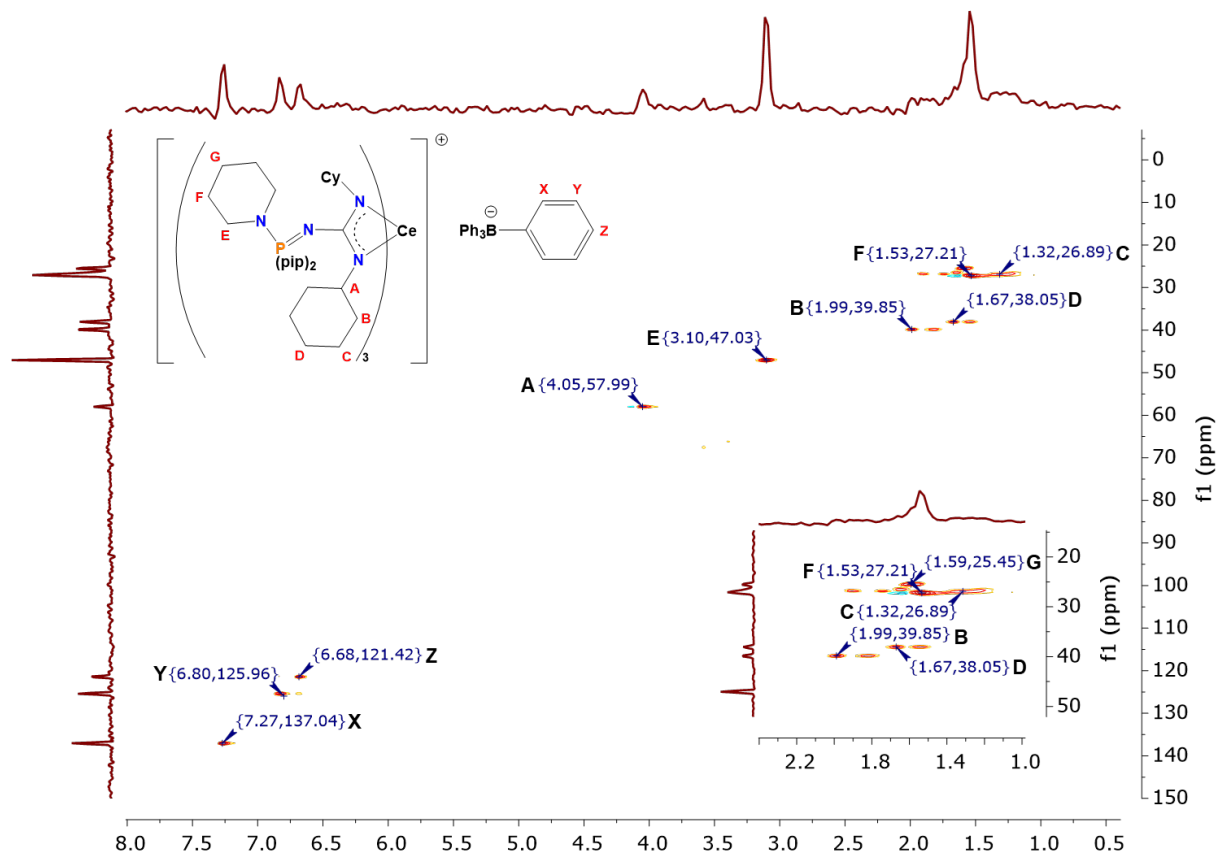

**Figure S12.** HSQC NMR contour plot of **2-Ce** (400.13 MHz,  $d_8$ -THF, 295 K). The X-axis (f2) corresponds to the  $^1\text{H}$  NMR spectrum of **2-Ce** and the Y-axis (f1) corresponds to the  $^{13}\text{C}\{^1\text{H}\}$  NMR spectrum of **2-Ce**.

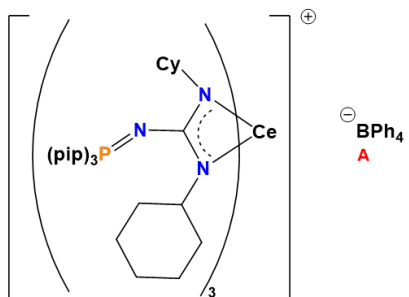

—8.68

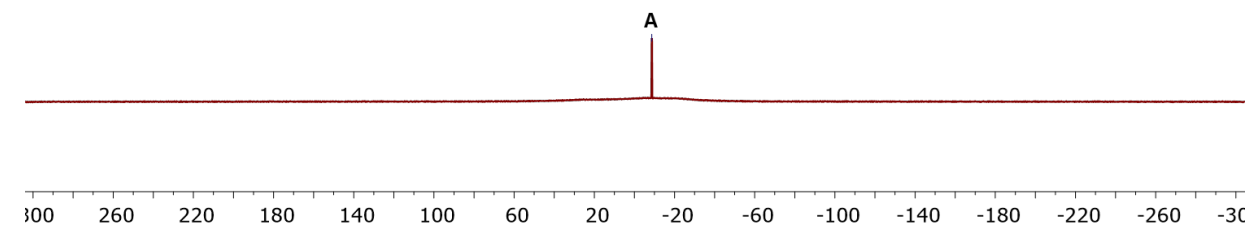

**Figure S13.**  $^{11}\text{B}$  NMR of **2-Ce** (128.38 MHz,  $d_8$ -THF, 295 K).

## UV-vis-NIR Spectroscopy

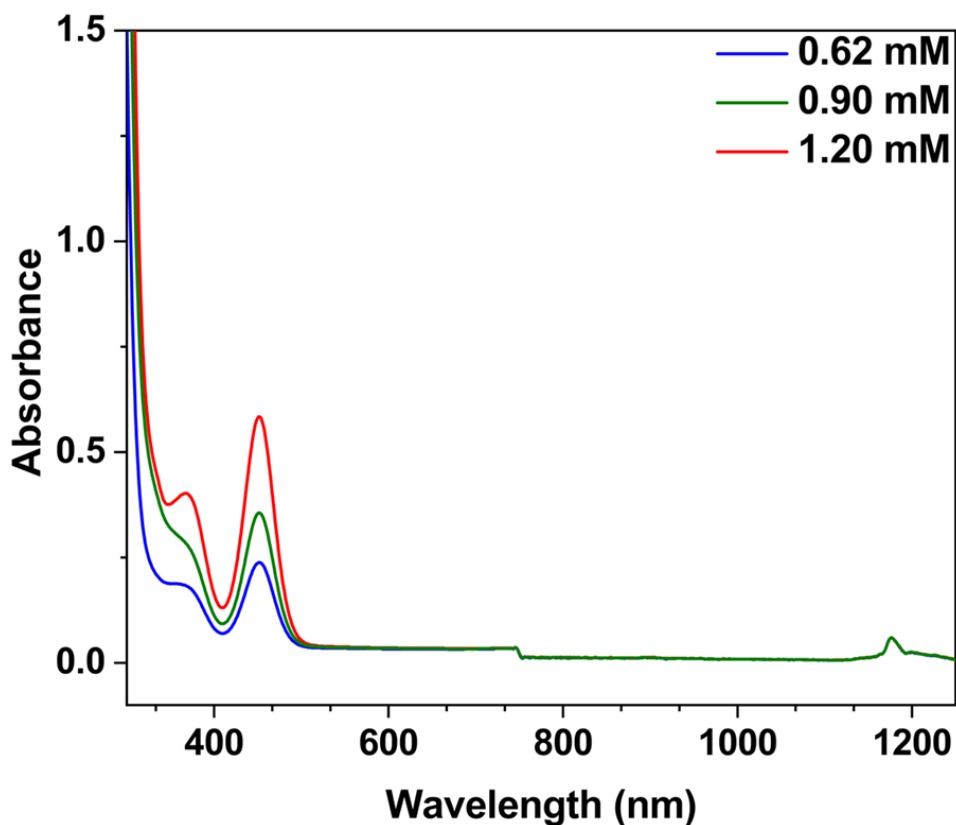

Figure S14. UV-Vis-NIR spectra of 1-Ce in THF.

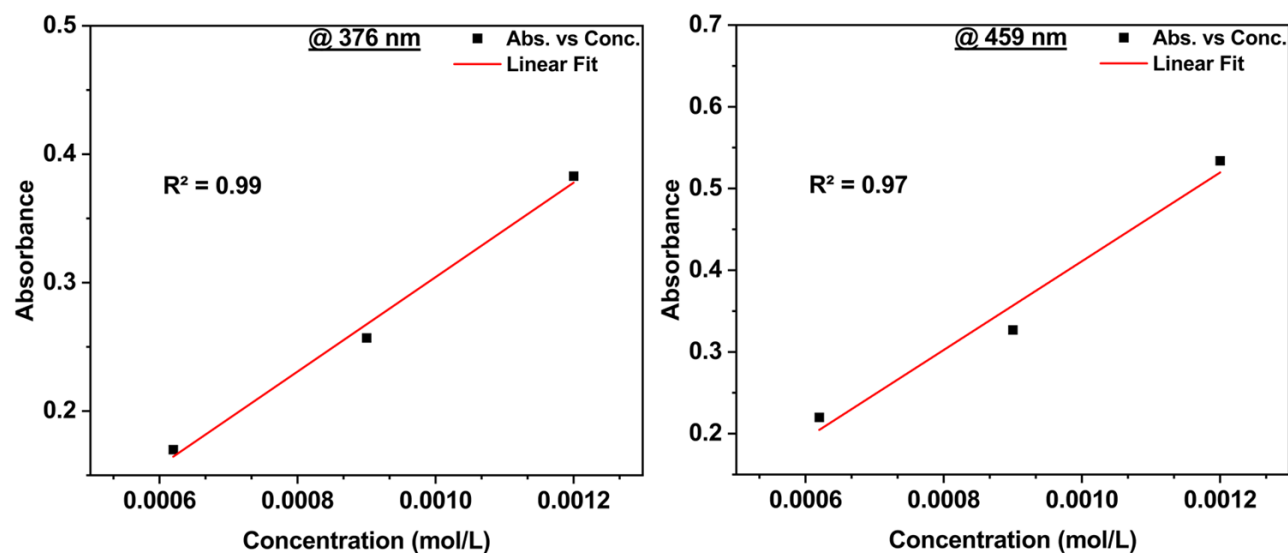

Figure S15. (Left) Linear regression of absorbance at 376 nm maximum where  $\epsilon = 368 \text{ cm}^{-1}\text{M}^{-1}$ . (Right) Linear regression of absorbance at 459 nm maximum where  $\epsilon = 543 \text{ cm}^{-1}\text{M}^{-1}$ .

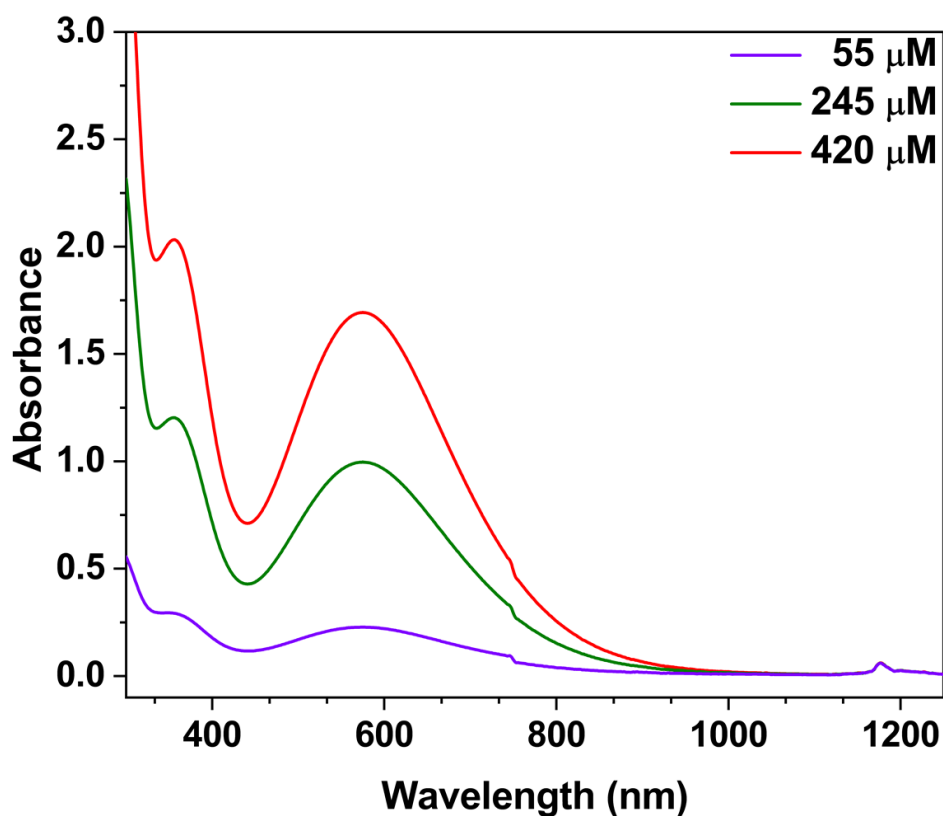

Figure S16. UV-Vis-NIR spectra of 2-Ce in THF.

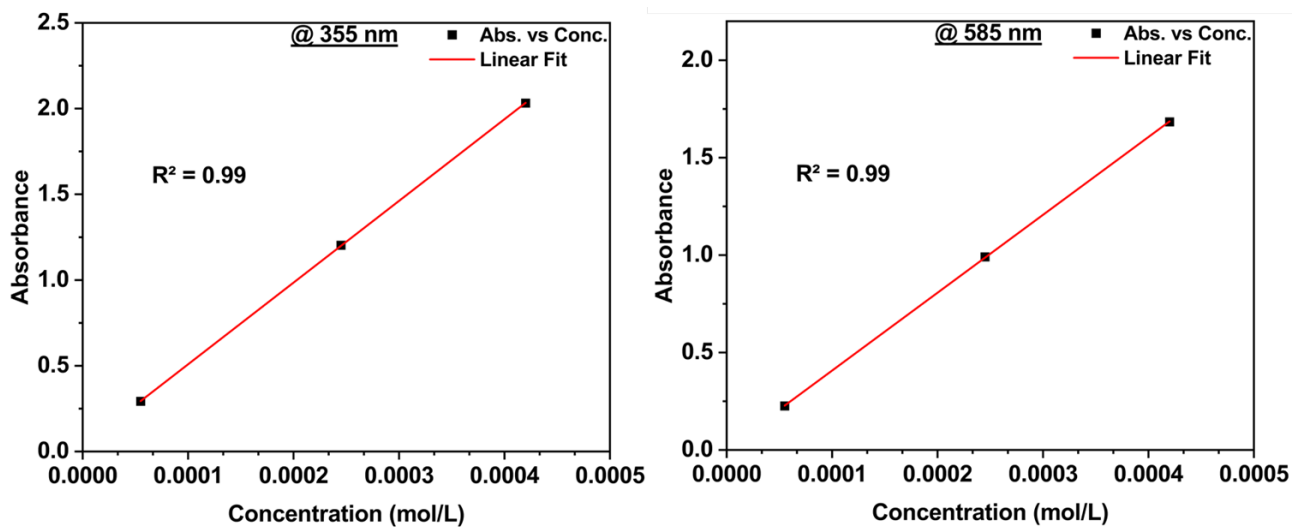

Figure S17. (Left) Linear regression of absorbance at 355 nm maximum where  $\epsilon = 4765 \text{ cm}^{-1}\text{M}^{-1}$ . (Right) Linear regression of absorbance at 585 nm maximum where  $\epsilon = 3995 \text{ cm}^{-1}\text{M}^{-1}$ .

## Excitation and Emission Spectra

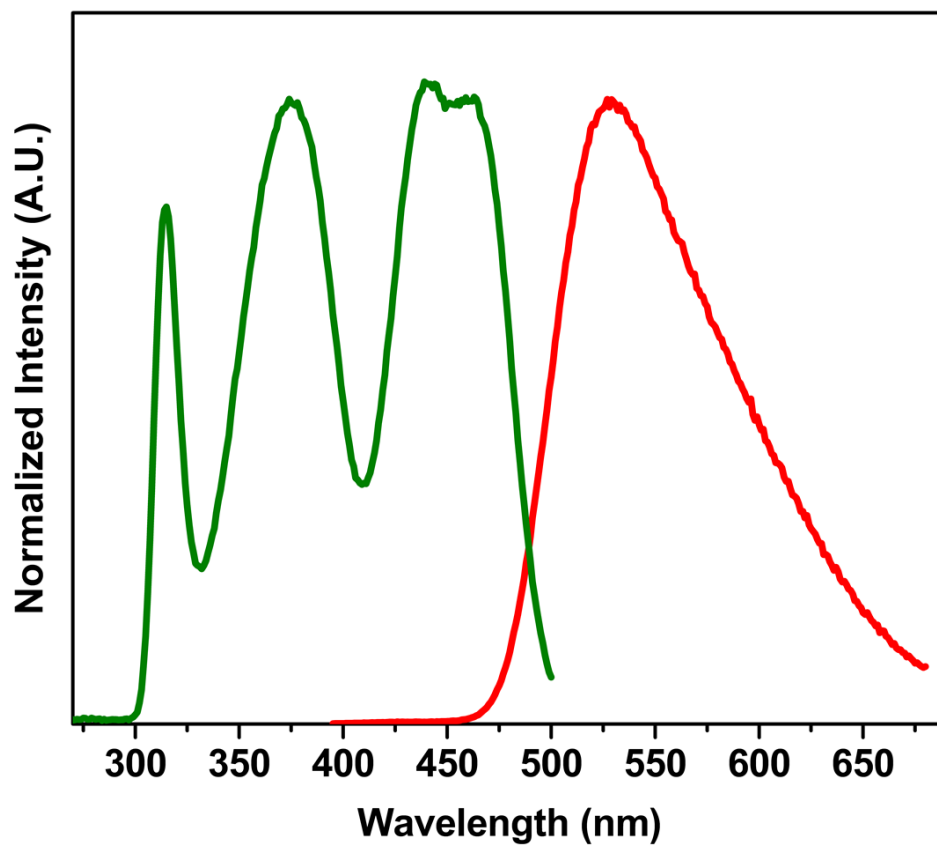

**Figure S18.** Co-plotted normalized excitation (green) and emission (red) spectra of **1-Ce** in THF.

## Cyclic Voltammetry

Electrochemical measurements were performed on a Pine Wave Driver 20 Bipotentiostat/Galvanostat. Measurements were performed inside a  $N_2$  atmosphere glovebox in a 20 mL electrochemical cell with a glassy carbon, a platinum wire counter electrode, and a Ag/AgCl pseudo reference electrode. Electrode were polished before each use. Measurements were performed in a positive feedback IR compensation mode and referenced versus  $Fc/Fc^+$ .

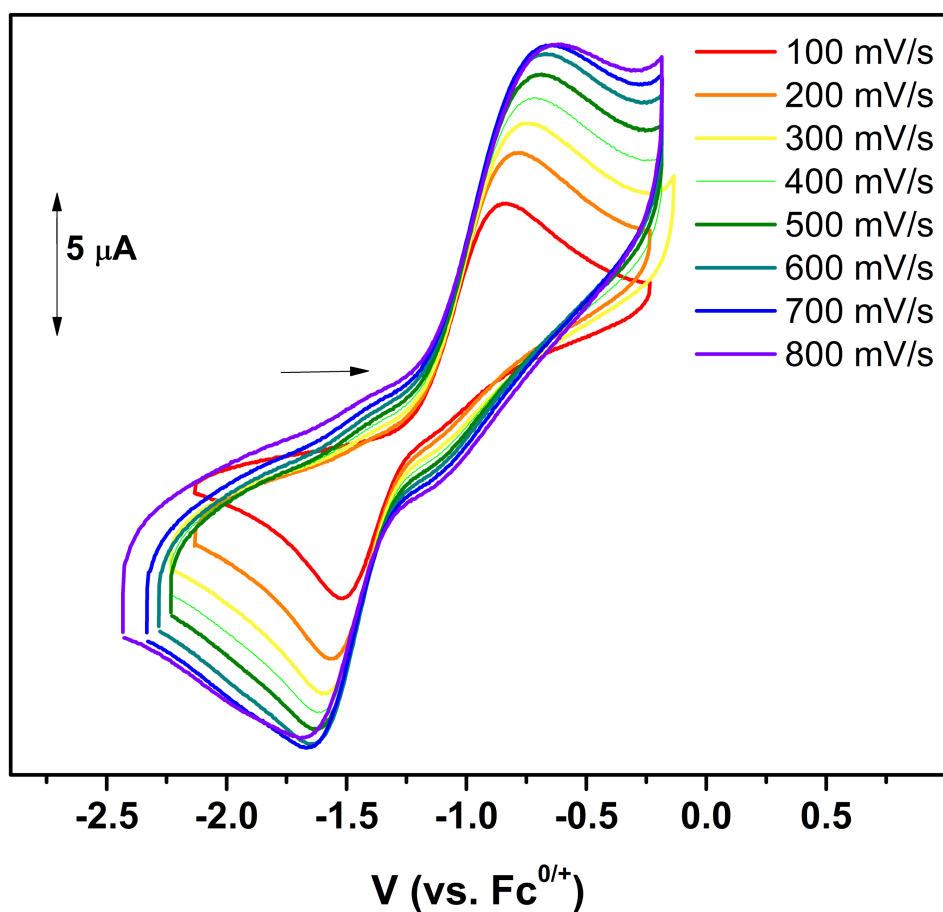

**Figure S19.** Scan rate dependence of  $Ce(III)$  in THF (0.1 M  $[NBu_4][PF_6]$ , 3mM analyte).

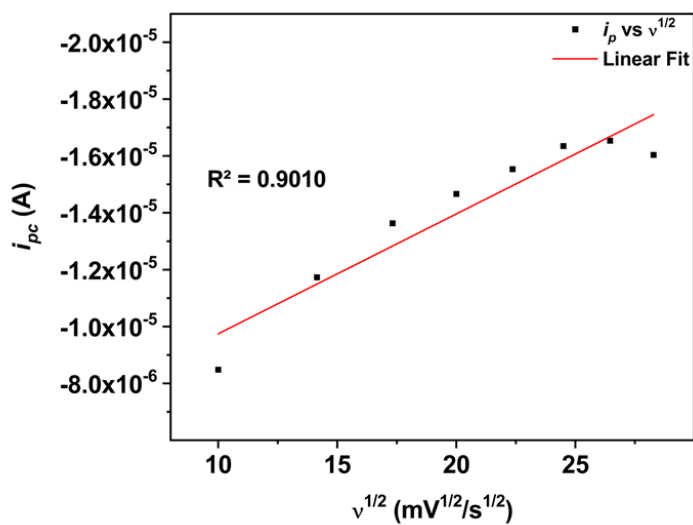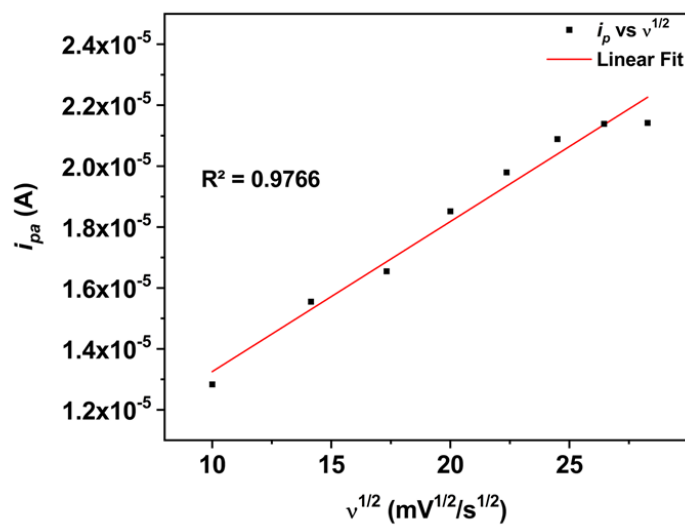

**Figure S20.** Randles-Sevcik Plots (left: cathodic wave, right: anodic wave) associated with Fig. S17.

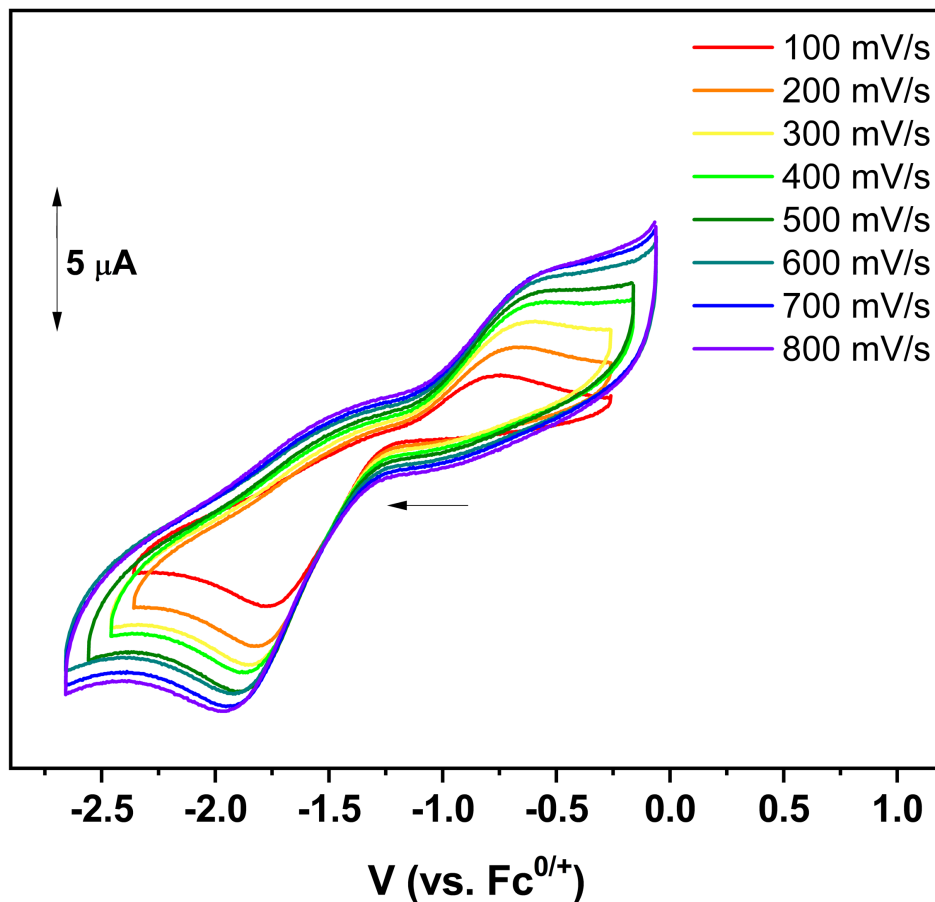

**Figure S21.** Scan rate dependence of Ce(IV) in THF (0.1 M [NBu<sub>4</sub>][PF<sub>6</sub>], 3mM analyte).

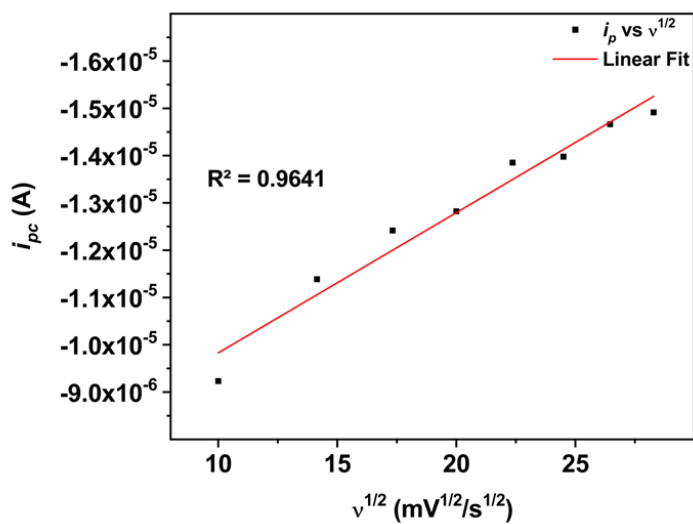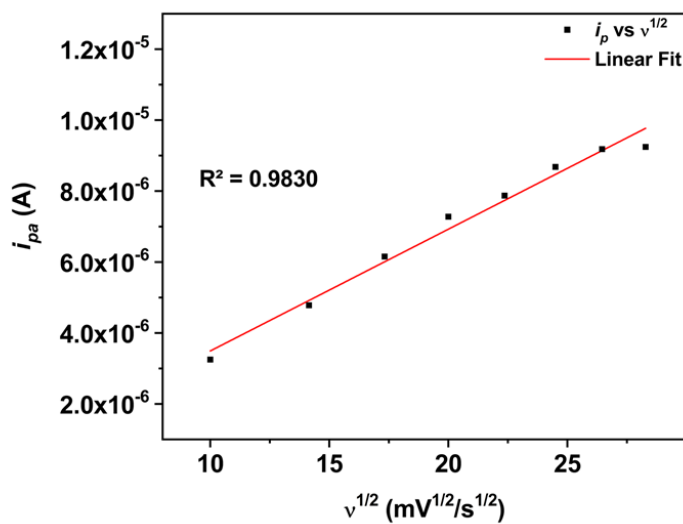

**Figure S22.** Randles-Sevcik Plots (left: cathodic wave, right: anodic wave) associated with Fig. S19.



## Ce L<sub>3</sub>-Edge XANES Spectroscopy

Cerium samples were prepared in an argon glovebox at Stanford Synchrotron Radiation Lightsource (SSRL) because both Ce<sup>4+</sup> and Ce<sup>3+</sup> complexes are air-sensitive. A mixture of the analyte and boron nitride (BN) was weighed, such that the edge jump for the absorbing atom was calculated to be at one absorption length in transmission (~8–12 mg for the cerium samples). The samples were diluted with BN (~10 mg), which had been dried at elevated temperature (250 °C) under vacuum ( $1 \times 10^{-3}$  Torr) for 24 h prior to use. Samples were ground with a mortar and pestle. Solid-state sample holders for the cerium samples consisted of an aluminum plate with a 3 × 15 mm oval window and screw holes. One side of the plate was covered with 0.5 mm Kapton tape, and the sample was evenly loaded in the window. The powder was then secured by covering the sample with a second piece of 0.5 mm Kapton tape. A second layer of the compound was painted onto a third piece of Kapton tape, which was subsequently fixed to the backside of the sample holder. The sample holder was then loaded onto a sample rod, taken out of the glovebox, and transported to the beamline while submerged within a liquid-nitrogen cooling bath. Once at the beam, the rod with the sample was placed at 45° inside the Oxford liquid helium cryostat, which was precooled at 85 K and attached to the SSRL beamline 4-3 rail. When the cryostat was closed, the system was put under vacuum and flushed with helium three times. The valve was closed, and the measurements were performed in the cryostat at 4 K.

The solid-state cerium complexes were characterized by metal L<sub>3</sub>- edge X-ray measurements. The XAS measurements were made at SSRL, under dedicated operating conditions (3.0 GeV, 5%, 500 mA using continuous top-off injections) on end station 11-2. With the use of a liquid-nitrogen-cooled double-crystal Si(220) ( $\varphi = 0$ ) monochromator that employed collimating and focusing mirrors, a single energy was selected from the incident white beam. For cerium measurements, the beam was fully tuned at 6023 eV, and harmonic rejection was achieved with Rh-coated mirror. The horizontal slit sizes were 8 mm, and vertical slit sizes were 1 mm in all measurements. The cryostat was attached to the beamline 11-2 XAS rail (SSRL), which was equipped with three ionization chambers, through which nitrogen gas was continually flowed. One chamber was positioned before the helium beam pass and the cryostat (10 cm) to monitor the incident radiation (I<sub>0</sub>). The second chamber was positioned after the cryostat (30 cm) so that sample transmission (I<sub>1</sub>) could be evaluated against I<sub>0</sub> and so that the absorption coefficient ( $\mu$ ) could be calculated as  $\ln(I_0/I_1)$ . The third chamber (I<sub>2</sub>; 30 cm) was positioned downstream from I<sub>1</sub> so that the XANES of a calibration foil could be measured against I<sub>1</sub>. A potential of 1100 V was applied in series to the ionization chambers. A Lytle detector under argon was placed on one side of the cryostat (4 cm) to detect the fluorescence from the samples. The cerium samples were calibrated in situ to the energy of the first inflection point of the K-edge of chromium foil (5989 eV). Data were acquired in triplicate and averaged. Background subtraction and normalization (at 5800 eV) were performed in Athena.<sup>4</sup> Curve fitting was performed in IgorPro 7.0 using a modified version of EDG\_FIT.<sup>5</sup> Derivative spectra were used as guides to determine the number and positions of the peaks, and edge features were modeled by pseudo-Voigt line shapes and an additional function consisting of arctangent and error function contributions, which was used to model the absorption threshold. Deconvoluted spectral models were performed

over several energy ranges. In the spectrum of **2-Ce**, five Voigts were employed to fit the spectrum:  $p_1$  (the quadrupole-allowed  $2p_{3/2} \rightarrow 4f$  transition),  $p_2$ ,  $p_3$ ,  $p_4$ , and  $p_5$  to model the double-white line feature. In the spectrum of **1-Ce**, a single Voigt was employed to model the white-line feature. The area under the (defined as the intensity) was calculated with the formula  $ph \times fwhm \times 1/4([\pi/\ln(2)]^{1/2} + \pi)$ , where  $ph$  = peak height (normalized intensity),  $fwhm$  = full-width at half-maximum height (eV), and the value  $1/4([\pi/\ln(2)]^{1/2} + \pi) \approx 1.318$  is a constant associated with the pseudo-Voigt function. The fits are shown in Figure S21 and summarized in Table S6. Relative parameter error estimates are calculated from the covariance matrix assuming normally distributed variances in the data. The absolute error in  $n_f$  is about 0.02 or 5%.

**Table S1.** Summary of fit parameters for Ce L<sub>3</sub>-edge XANES of **Ce(III)** and **Ce(IV)**. For **Ce(IV)** 5 Voigt functions were used.

| Complex     | Peak 1    | Peak 2      | Peak 3    | Peak 4      | Peak 5    |
|-------------|-----------|-------------|-----------|-------------|-----------|
|             | Intensity | Energy (eV) | Intensity | Energy (eV) | Intensity |
| <b>1-Ce</b> | 7.47(0)   | 5726.0(0)   | -         | -           | -         |
| <b>2-Ce</b> | 0.11(0)   | 5719.5(0)   | 1.57(4)   | 5724.8(0)   | 7.23(7)   |
|             |           |             | $n_r$     | 0.50(2)     |           |
|             |           |             |           | 5729.0(0)   | 6.71(10)  |
|             |           |             |           | 5735.6(0)   | 1.99(6)   |
|             |           |             |           |             | 5739.3(6) |

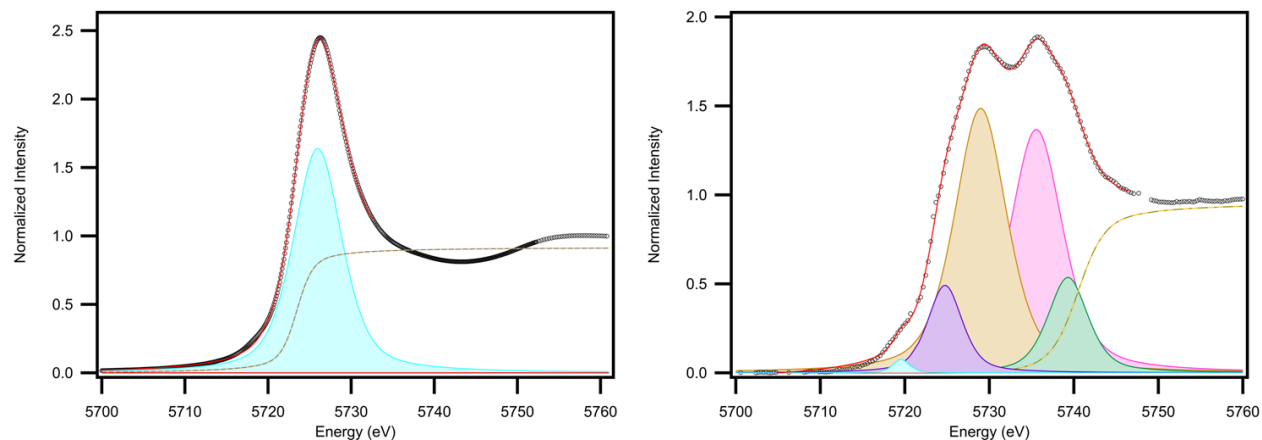

**Figure S23.** Ce L<sub>3</sub>-edge XAS Experimental data (black) obtained for **Ce(III)** (right) and **Ce(IV)** (left) and the pseudo-Voigt [blue (p1), purple (p2), orange (p3), pink (p4), and green (p5)] and steplike functions (yellow/gray dashed line), which sum to generate the curve fit (red).

**Table S2.** Background subtracted and normalized spectrum of Ce L<sub>3</sub>-edge XANES of 1-Ce and 2-Ce.

| CellI_Int | CellI_eV  | CeIV_Int | CeIV_eV   |
|-----------|-----------|----------|-----------|
| 5.57E+03  | -5.07E-01 | 5.52E+03 | -2.45E-03 |
| 5.58E+03  | -4.10E-01 | 5.53E+03 | 3.87E-03  |
| 5.58E+03  | -3.15E-01 | 5.53E+03 | 3.14E-03  |
| 5.59E+03  | -2.27E-01 | 5.53E+03 | 3.03E-03  |
| 5.59E+03  | -1.54E-01 | 5.53E+03 | 2.67E-03  |
| 5.60E+03  | -1.05E-01 | 5.54E+03 | 1.07E-03  |
| 5.60E+03  | -6.65E-02 | 5.54E+03 | 1.67E-03  |
| 5.61E+03  | -4.41E-02 | 5.54E+03 | 1.80E-03  |
| 5.61E+03  | -1.32E-02 | 5.55E+03 | 1.59E-03  |
| 5.62E+03  | 2.27E-03  | 5.55E+03 | 1.39E-03  |
| 5.62E+03  | 1.91E-02  | 5.55E+03 | 1.30E-03  |
| 5.63E+03  | 2.67E-02  | 5.56E+03 | 1.12E-03  |
| 5.63E+03  | 3.84E-02  | 5.56E+03 | 1.42E-03  |
| 5.64E+03  | 3.60E-02  | 5.56E+03 | 1.07E-03  |
| 5.64E+03  | 3.10E-02  | 5.57E+03 | 8.26E-04  |
| 5.65E+03  | 2.93E-02  | 5.57E+03 | 1.18E-03  |
| 5.65E+03  | 2.34E-02  | 5.57E+03 | 1.42E-03  |
| 5.66E+03  | 1.64E-02  | 5.58E+03 | 8.68E-04  |
| 5.66E+03  | 1.02E-02  | 5.58E+03 | 1.10E-03  |
| 5.67E+03  | -4.16E-03 | 5.58E+03 | 2.30E-03  |
| 5.67E+03  | -1.28E-02 | 5.58E+03 | 1.56E-03  |
| 5.68E+03  | -1.30E-02 | 5.59E+03 | -3.29E-04 |
| 5.68E+03  | -1.19E-02 | 5.59E+03 | -1.14E-04 |
| 5.69E+03  | -1.33E-02 | 5.59E+03 | -6.79E-04 |
| 5.69E+03  | -1.43E-02 | 5.60E+03 | -5.94E-04 |
| 5.69E+03  | -1.23E-02 | 5.60E+03 | -7.76E-04 |
| 5.69E+03  | -8.57E-03 | 5.60E+03 | -7.54E-04 |
| 5.69E+03  | -1.02E-02 | 5.61E+03 | -1.12E-03 |
| 5.69E+03  | -9.75E-03 | 5.61E+03 | -8.03E-04 |
| 5.69E+03  | -6.92E-03 | 5.61E+03 | -1.38E-03 |
| 5.69E+03  | -5.42E-04 | 5.62E+03 | -1.30E-03 |
| 5.69E+03  | 3.12E-03  | 5.62E+03 | -1.84E-03 |
| 5.70E+03  | 8.34E-03  | 5.62E+03 | -1.39E-03 |
| 5.70E+03  | 8.29E-03  | 5.62E+03 | -1.19E-03 |
| 5.70E+03  | 4.15E-03  | 5.63E+03 | -1.13E-03 |
| 5.70E+03  | 5.11E-03  | 5.63E+03 | -1.73E-03 |
| 5.70E+03  | 3.73E-03  | 5.63E+03 | -1.57E-03 |
| 5.70E+03  | 3.91E-03  | 5.64E+03 | -1.46E-03 |

|          |           |          |           |
|----------|-----------|----------|-----------|
| 5.70E+03 | -2.77E-03 | 5.64E+03 | -1.66E-03 |
| 5.70E+03 | -5.96E-03 | 5.64E+03 | -1.45E-03 |
| 5.70E+03 | -8.58E-03 | 5.65E+03 | -1.77E-03 |
| 5.70E+03 | -6.43E-03 | 5.65E+03 | -1.03E-03 |
| 5.70E+03 | -3.98E-03 | 5.65E+03 | -1.36E-03 |
| 5.70E+03 | -4.21E-03 | 5.66E+03 | -7.07E-04 |
| 5.70E+03 | -2.77E-03 | 5.66E+03 | -5.45E-04 |
| 5.70E+03 | -3.48E-03 | 5.66E+03 | 8.11E-05  |
| 5.70E+03 | -4.12E-03 | 5.66E+03 | 5.04E-04  |
| 5.70E+03 | 1.40E-03  | 5.67E+03 | 5.30E-04  |
| 5.70E+03 | -4.37E-03 | 5.67E+03 | 7.63E-04  |
| 5.70E+03 | -3.80E-03 | 5.67E+03 | 1.19E-03  |
| 5.70E+03 | -3.66E-03 | 5.68E+03 | 2.18E-03  |
| 5.70E+03 | -9.61E-04 | 5.68E+03 | 3.10E-03  |
| 5.70E+03 | -1.67E-03 | 5.68E+03 | 4.03E-03  |
| 5.70E+03 | 4.43E-04  | 5.69E+03 | 1.45E-03  |
| 5.70E+03 | 2.99E-03  | 5.69E+03 | 6.33E-03  |
| 5.70E+03 | 5.17E-03  | 5.69E+03 | 8.43E-03  |
| 5.70E+03 | 2.72E-03  | 5.69E+03 | 8.31E-03  |
| 5.70E+03 | 5.02E-03  | 5.69E+03 | 8.36E-03  |
| 5.70E+03 | 5.51E-04  | 5.69E+03 | 8.28E-03  |
| 5.70E+03 | 1.11E-04  | 5.69E+03 | 8.22E-03  |
| 5.70E+03 | 2.94E-03  | 5.69E+03 | 8.46E-03  |
| 5.70E+03 | 1.83E-03  | 5.69E+03 | 8.52E-03  |
| 5.71E+03 | -6.67E-04 | 5.69E+03 | 8.96E-03  |
| 5.71E+03 | -3.56E-03 | 5.69E+03 | 8.59E-03  |
| 5.71E+03 | -3.79E-03 | 5.69E+03 | 8.66E-03  |
| 5.71E+03 | -7.93E-04 | 5.69E+03 | 9.04E-03  |
| 5.71E+03 | 2.30E-03  | 5.69E+03 | 8.94E-03  |
| 5.71E+03 | -7.14E-05 | 5.69E+03 | 9.07E-03  |
| 5.71E+03 | -1.45E-03 | 5.69E+03 | 9.36E-03  |
| 5.71E+03 | -3.98E-03 | 5.69E+03 | 9.35E-03  |
| 5.71E+03 | -6.98E-04 | 5.69E+03 | 9.48E-03  |
| 5.71E+03 | -1.79E-03 | 5.69E+03 | 9.69E-03  |
| 5.71E+03 | 3.26E-03  | 5.69E+03 | 9.50E-03  |
| 5.71E+03 | 5.88E-03  | 5.69E+03 | 9.83E-03  |
| 5.71E+03 | 7.84E-03  | 5.69E+03 | 9.65E-03  |
| 5.71E+03 | 8.80E-03  | 5.69E+03 | 9.64E-03  |
| 5.71E+03 | 8.57E-03  | 5.69E+03 | 9.73E-03  |
| 5.71E+03 | 9.44E-03  | 5.69E+03 | 1.01E-02  |
| 5.71E+03 | 5.54E-03  | 5.69E+03 | 1.02E-02  |
| 5.71E+03 | 6.48E-03  | 5.70E+03 | 1.01E-02  |
| 5.71E+03 | 4.83E-03  | 5.70E+03 | 1.03E-02  |

|          |          |          |          |
|----------|----------|----------|----------|
| 5.71E+03 | 4.69E-03 | 5.70E+03 | 1.04E-02 |
| 5.71E+03 | 6.49E-03 | 5.70E+03 | 1.04E-02 |
| 5.71E+03 | 7.51E-03 | 5.70E+03 | 1.04E-02 |
| 5.71E+03 | 1.05E-02 | 5.70E+03 | 1.05E-02 |
| 5.71E+03 | 1.57E-02 | 5.70E+03 | 1.08E-02 |
| 5.71E+03 | 2.06E-02 | 5.70E+03 | 1.10E-02 |
| 5.71E+03 | 1.85E-02 | 5.70E+03 | 1.09E-02 |
| 5.71E+03 | 1.88E-02 | 5.70E+03 | 1.10E-02 |
| 5.71E+03 | 1.98E-02 | 5.70E+03 | 1.12E-02 |
| 5.71E+03 | 2.25E-02 | 5.70E+03 | 1.11E-02 |
| 5.71E+03 | 3.06E-02 | 5.70E+03 | 1.14E-02 |
| 5.71E+03 | 3.16E-02 | 5.70E+03 | 1.14E-02 |
| 5.71E+03 | 3.68E-02 | 5.70E+03 | 1.15E-02 |
| 5.71E+03 | 3.48E-02 | 5.70E+03 | 1.16E-02 |
| 5.71E+03 | 4.32E-02 | 5.70E+03 | 1.18E-02 |
| 5.72E+03 | 4.69E-02 | 5.70E+03 | 1.19E-02 |
| 5.72E+03 | 5.25E-02 | 5.70E+03 | 1.18E-02 |
| 5.72E+03 | 6.15E-02 | 5.70E+03 | 1.21E-02 |
| 5.72E+03 | 6.57E-02 | 5.70E+03 | 1.23E-02 |
| 5.72E+03 | 7.50E-02 | 5.70E+03 | 1.23E-02 |
| 5.72E+03 | 8.64E-02 | 5.70E+03 | 1.23E-02 |
| 5.72E+03 | 9.69E-02 | 5.70E+03 | 1.25E-02 |
| 5.72E+03 | 1.15E-01 | 5.70E+03 | 1.26E-02 |
| 5.72E+03 | 1.32E-01 | 5.70E+03 | 1.28E-02 |
| 5.72E+03 | 1.51E-01 | 5.70E+03 | 1.30E-02 |
| 5.72E+03 | 1.72E-01 | 5.70E+03 | 1.33E-02 |
| 5.72E+03 | 1.87E-01 | 5.70E+03 | 1.32E-02 |
| 5.72E+03 | 2.03E-01 | 5.70E+03 | 1.33E-02 |
| 5.72E+03 | 2.25E-01 | 5.70E+03 | 1.33E-02 |
| 5.72E+03 | 2.42E-01 | 5.70E+03 | 1.35E-02 |
| 5.72E+03 | 2.63E-01 | 5.70E+03 | 1.36E-02 |
| 5.72E+03 | 2.79E-01 | 5.70E+03 | 1.36E-02 |
| 5.72E+03 | 2.94E-01 | 5.70E+03 | 1.37E-02 |
| 5.72E+03 | 3.33E-01 | 5.70E+03 | 1.39E-02 |
| 5.72E+03 | 4.05E-01 | 5.70E+03 | 1.42E-02 |
| 5.72E+03 | 4.25E-01 | 5.70E+03 | 1.43E-02 |
| 5.72E+03 | 4.82E-01 | 5.70E+03 | 1.44E-02 |
| 5.72E+03 | 5.48E-01 | 5.70E+03 | 1.44E-02 |
| 5.72E+03 | 6.25E-01 | 5.70E+03 | 1.46E-02 |
| 5.72E+03 | 7.39E-01 | 5.70E+03 | 1.47E-02 |
| 5.72E+03 | 8.78E-01 | 5.70E+03 | 1.50E-02 |
| 5.72E+03 | 9.58E-01 | 5.70E+03 | 1.50E-02 |
| 5.72E+03 | 9.95E-01 | 5.70E+03 | 1.51E-02 |

|          |          |          |          |
|----------|----------|----------|----------|
| 5.72E+03 | 1.05E+00 | 5.70E+03 | 1.55E-02 |
| 5.72E+03 | 1.12E+00 | 5.70E+03 | 1.57E-02 |
| 5.72E+03 | 1.19E+00 | 5.70E+03 | 1.61E-02 |
| 5.73E+03 | 1.26E+00 | 5.70E+03 | 1.59E-02 |
| 5.73E+03 | 1.32E+00 | 5.70E+03 | 1.62E-02 |
| 5.73E+03 | 1.38E+00 | 5.70E+03 | 1.63E-02 |
| 5.73E+03 | 1.44E+00 | 5.70E+03 | 1.64E-02 |
| 5.73E+03 | 1.49E+00 | 5.70E+03 | 1.66E-02 |
| 5.73E+03 | 1.54E+00 | 5.70E+03 | 1.65E-02 |
| 5.73E+03 | 1.60E+00 | 5.70E+03 | 1.67E-02 |
| 5.73E+03 | 1.65E+00 | 5.70E+03 | 1.70E-02 |
| 5.73E+03 | 1.69E+00 | 5.70E+03 | 1.71E-02 |
| 5.73E+03 | 1.74E+00 | 5.70E+03 | 1.73E-02 |
| 5.73E+03 | 1.77E+00 | 5.70E+03 | 1.75E-02 |
| 5.73E+03 | 1.80E+00 | 5.70E+03 | 1.77E-02 |
| 5.73E+03 | 1.82E+00 | 5.70E+03 | 1.80E-02 |
| 5.73E+03 | 1.83E+00 | 5.70E+03 | 1.80E-02 |
| 5.73E+03 | 1.83E+00 | 5.70E+03 | 1.82E-02 |
| 5.73E+03 | 1.83E+00 | 5.70E+03 | 1.84E-02 |
| 5.73E+03 | 1.82E+00 | 5.70E+03 | 1.83E-02 |
| 5.73E+03 | 1.80E+00 | 5.70E+03 | 1.88E-02 |
| 5.73E+03 | 1.79E+00 | 5.70E+03 | 1.89E-02 |
| 5.73E+03 | 1.77E+00 | 5.70E+03 | 1.93E-02 |
| 5.73E+03 | 1.76E+00 | 5.70E+03 | 1.93E-02 |
| 5.73E+03 | 1.74E+00 | 5.70E+03 | 1.96E-02 |
| 5.73E+03 | 1.73E+00 | 5.70E+03 | 1.97E-02 |
| 5.73E+03 | 1.73E+00 | 5.70E+03 | 1.99E-02 |
| 5.73E+03 | 1.72E+00 | 5.70E+03 | 2.01E-02 |
| 5.73E+03 | 1.72E+00 | 5.70E+03 | 2.02E-02 |
| 5.73E+03 | 1.72E+00 | 5.70E+03 | 2.05E-02 |
| 5.73E+03 | 1.73E+00 | 5.70E+03 | 2.05E-02 |
| 5.73E+03 | 1.74E+00 | 5.70E+03 | 2.07E-02 |
| 5.73E+03 | 1.76E+00 | 5.70E+03 | 2.09E-02 |
| 5.73E+03 | 1.78E+00 | 5.70E+03 | 2.13E-02 |
| 5.73E+03 | 1.81E+00 | 5.70E+03 | 2.15E-02 |
| 5.73E+03 | 1.83E+00 | 5.70E+03 | 2.17E-02 |
| 5.74E+03 | 1.86E+00 | 5.70E+03 | 2.19E-02 |
| 5.74E+03 | 1.88E+00 | 5.70E+03 | 2.14E-02 |
| 5.74E+03 | 1.89E+00 | 5.70E+03 | 2.16E-02 |
| 5.74E+03 | 1.89E+00 | 5.70E+03 | 2.19E-02 |
| 5.74E+03 | 1.87E+00 | 5.70E+03 | 2.22E-02 |
| 5.74E+03 | 1.85E+00 | 5.70E+03 | 2.24E-02 |
| 5.74E+03 | 1.83E+00 | 5.70E+03 | 2.26E-02 |

|          |          |          |          |
|----------|----------|----------|----------|
| 5.74E+03 | 1.80E+00 | 5.70E+03 | 2.30E-02 |
| 5.74E+03 | 1.77E+00 | 5.70E+03 | 2.30E-02 |
| 5.74E+03 | 1.75E+00 | 5.70E+03 | 2.33E-02 |
| 5.74E+03 | 1.73E+00 | 5.70E+03 | 2.36E-02 |
| 5.74E+03 | 1.71E+00 | 5.70E+03 | 2.37E-02 |
| 5.74E+03 | 1.69E+00 | 5.70E+03 | 2.40E-02 |
| 5.74E+03 | 1.65E+00 | 5.70E+03 | 2.42E-02 |
| 5.74E+03 | 1.62E+00 | 5.70E+03 | 2.45E-02 |
| 5.74E+03 | 1.58E+00 | 5.70E+03 | 2.49E-02 |
| 5.74E+03 | 1.53E+00 | 5.70E+03 | 2.50E-02 |
| 5.74E+03 | 1.49E+00 | 5.70E+03 | 2.56E-02 |
| 5.74E+03 | 1.45E+00 | 5.70E+03 | 2.56E-02 |
| 5.74E+03 | 1.41E+00 | 5.71E+03 | 2.60E-02 |
| 5.74E+03 | 1.37E+00 | 5.71E+03 | 2.61E-02 |
| 5.74E+03 | 1.33E+00 | 5.71E+03 | 2.64E-02 |
| 5.74E+03 | 1.28E+00 | 5.71E+03 | 2.65E-02 |
| 5.74E+03 | 1.25E+00 | 5.71E+03 | 2.70E-02 |
| 5.74E+03 | 1.21E+00 | 5.71E+03 | 2.73E-02 |
| 5.74E+03 | 1.18E+00 | 5.71E+03 | 2.76E-02 |
| 5.74E+03 | 1.16E+00 | 5.71E+03 | 2.81E-02 |
| 5.74E+03 | 1.13E+00 | 5.71E+03 | 2.82E-02 |
| 5.74E+03 | 1.12E+00 | 5.71E+03 | 2.86E-02 |
| 5.74E+03 | 1.10E+00 | 5.71E+03 | 2.88E-02 |
| 5.74E+03 | 1.10E+00 | 5.71E+03 | 2.91E-02 |
| 5.74E+03 | 1.09E+00 | 5.71E+03 | 2.94E-02 |
| 5.74E+03 | 1.08E+00 | 5.71E+03 | 2.98E-02 |
| 5.74E+03 | 1.07E+00 | 5.71E+03 | 3.00E-02 |
| 5.75E+03 | 1.05E+00 | 5.71E+03 | 3.03E-02 |
| 5.75E+03 | 1.04E+00 | 5.71E+03 | 3.07E-02 |
| 5.75E+03 | 1.03E+00 | 5.71E+03 | 3.09E-02 |
| 5.75E+03 | 1.03E+00 | 5.71E+03 | 3.13E-02 |
| 5.75E+03 | 1.02E+00 | 5.71E+03 | 3.15E-02 |
| 5.75E+03 | 1.01E+00 | 5.71E+03 | 3.20E-02 |
| 5.75E+03 | 1.01E+00 | 5.71E+03 | 3.23E-02 |
| 5.75E+03 | 1.01E+00 | 5.71E+03 | 3.29E-02 |
| 5.75E+03 | 9.72E-01 | 5.71E+03 | 3.33E-02 |
| 5.75E+03 | 9.68E-01 | 5.71E+03 | 3.37E-02 |
| 5.75E+03 | 9.66E-01 | 5.71E+03 | 3.42E-02 |
| 5.75E+03 | 9.60E-01 | 5.71E+03 | 3.47E-02 |
| 5.75E+03 | 9.60E-01 | 5.71E+03 | 3.51E-02 |
| 5.75E+03 | 9.60E-01 | 5.71E+03 | 3.54E-02 |
| 5.75E+03 | 9.58E-01 | 5.71E+03 | 3.58E-02 |
| 5.75E+03 | 9.58E-01 | 5.71E+03 | 3.63E-02 |



|          |          |          |          |
|----------|----------|----------|----------|
| 5.75E+03 | 9.56E-01 | 5.71E+03 | 3.68E-02 |
| 5.75E+03 | 9.57E-01 | 5.71E+03 | 3.72E-02 |
| 5.75E+03 | 9.63E-01 | 5.71E+03 | 3.80E-02 |
| 5.75E+03 | 9.59E-01 | 5.71E+03 | 3.85E-02 |
| 5.75E+03 | 9.61E-01 | 5.71E+03 | 3.89E-02 |
| 5.75E+03 | 9.63E-01 | 5.71E+03 | 3.92E-02 |
| 5.75E+03 | 9.61E-01 | 5.71E+03 | 3.98E-02 |
| 5.75E+03 | 9.64E-01 | 5.71E+03 | 4.02E-02 |
| 5.75E+03 | 9.60E-01 | 5.71E+03 | 4.08E-02 |
| 5.75E+03 | 9.62E-01 | 5.71E+03 | 4.14E-02 |
| 5.75E+03 | 9.68E-01 | 5.71E+03 | 4.19E-02 |
| 5.75E+03 | 9.73E-01 | 5.71E+03 | 4.26E-02 |
| 5.76E+03 | 9.71E-01 | 5.71E+03 | 4.31E-02 |
| 5.76E+03 | 9.68E-01 | 5.71E+03 | 4.38E-02 |
| 5.76E+03 | 9.67E-01 | 5.71E+03 | 4.42E-02 |
| 5.76E+03 | 9.65E-01 | 5.71E+03 | 4.48E-02 |
| 5.76E+03 | 9.64E-01 | 5.71E+03 | 4.51E-02 |
| 5.76E+03 | 9.64E-01 | 5.71E+03 | 4.60E-02 |
| 5.76E+03 | 9.66E-01 | 5.71E+03 | 4.65E-02 |
| 5.76E+03 | 9.63E-01 | 5.71E+03 | 4.71E-02 |
| 5.76E+03 | 9.63E-01 | 5.71E+03 | 4.79E-02 |
| 5.76E+03 | 9.67E-01 | 5.71E+03 | 4.84E-02 |
| 5.76E+03 | 9.66E-01 | 5.71E+03 | 4.91E-02 |
| 5.76E+03 | 9.69E-01 | 5.71E+03 | 4.97E-02 |
| 5.76E+03 | 9.73E-01 | 5.71E+03 | 5.03E-02 |
| 5.76E+03 | 9.75E-01 | 5.71E+03 | 5.12E-02 |
| 5.76E+03 | 9.75E-01 | 5.71E+03 | 5.19E-02 |
| 5.76E+03 | 9.75E-01 | 5.71E+03 | 5.24E-02 |
| 5.76E+03 | 9.77E-01 | 5.71E+03 | 5.32E-02 |
| 5.76E+03 | 9.78E-01 | 5.71E+03 | 5.40E-02 |
| 5.76E+03 | 9.75E-01 | 5.71E+03 | 5.48E-02 |
| 5.76E+03 | 9.74E-01 | 5.71E+03 | 5.55E-02 |
| 5.76E+03 | 9.74E-01 | 5.71E+03 | 5.62E-02 |
| 5.76E+03 | 9.79E-01 | 5.71E+03 | 5.69E-02 |
| 5.76E+03 | 9.83E-01 | 5.71E+03 | 5.79E-02 |
| 5.76E+03 | 9.84E-01 | 5.71E+03 | 5.86E-02 |
| 5.76E+03 | 9.81E-01 | 5.71E+03 | 5.93E-02 |
| 5.76E+03 | 9.85E-01 | 5.71E+03 | 6.03E-02 |
| 5.76E+03 | 9.90E-01 | 5.71E+03 | 6.12E-02 |
| 5.76E+03 | 9.90E-01 | 5.71E+03 | 6.24E-02 |
| 5.76E+03 | 9.93E-01 | 5.71E+03 | 6.34E-02 |
| 5.76E+03 | 9.94E-01 | 5.71E+03 | 6.41E-02 |
| 5.76E+03 | 9.96E-01 | 5.71E+03 | 6.53E-02 |

|          |          |          |          |
|----------|----------|----------|----------|
| 5.76E+03 | 1.00E+00 | 5.71E+03 | 6.65E-02 |
| 5.76E+03 | 9.99E-01 | 5.71E+03 | 6.74E-02 |
| 5.77E+03 | 9.97E-01 | 5.71E+03 | 6.86E-02 |
| 5.77E+03 | 9.97E-01 | 5.71E+03 | 6.98E-02 |
| 5.77E+03 | 1.00E+00 | 5.71E+03 | 7.09E-02 |
| 5.77E+03 | 1.00E+00 | 5.71E+03 | 7.20E-02 |
| 5.77E+03 | 1.00E+00 | 5.71E+03 | 7.34E-02 |
| 5.77E+03 | 1.01E+00 | 5.71E+03 | 7.46E-02 |
| 5.77E+03 | 1.01E+00 | 5.71E+03 | 7.58E-02 |
| 5.77E+03 | 1.03E+00 | 5.71E+03 | 7.69E-02 |
| 5.77E+03 | 1.03E+00 | 5.71E+03 | 7.85E-02 |
| 5.77E+03 | 1.03E+00 | 5.71E+03 | 7.98E-02 |
| 5.77E+03 | 1.04E+00 | 5.71E+03 | 8.12E-02 |
| 5.77E+03 | 1.05E+00 | 5.71E+03 | 8.25E-02 |
| 5.77E+03 | 1.05E+00 | 5.71E+03 | 8.40E-02 |
| 5.77E+03 | 1.05E+00 | 5.71E+03 | 8.61E-02 |
| 5.77E+03 | 1.05E+00 | 5.71E+03 | 8.75E-02 |
| 5.77E+03 | 1.04E+00 | 5.71E+03 | 8.91E-02 |
| 5.77E+03 | 1.04E+00 | 5.71E+03 | 9.09E-02 |
| 5.77E+03 | 1.04E+00 | 5.71E+03 | 9.24E-02 |
| 5.77E+03 | 1.04E+00 | 5.71E+03 | 9.37E-02 |
| 5.77E+03 | 1.05E+00 | 5.71E+03 | 9.56E-02 |
| 5.77E+03 | 1.05E+00 | 5.71E+03 | 9.73E-02 |
| 5.77E+03 | 1.05E+00 | 5.71E+03 | 9.93E-02 |
| 5.77E+03 | 1.05E+00 | 5.71E+03 | 1.01E-01 |
| 5.77E+03 | 1.04E+00 | 5.71E+03 | 1.03E-01 |
| 5.77E+03 | 1.04E+00 | 5.72E+03 | 1.06E-01 |
| 5.77E+03 | 1.04E+00 | 5.72E+03 | 1.08E-01 |
| 5.77E+03 | 1.04E+00 | 5.72E+03 | 1.10E-01 |
| 5.77E+03 | 1.04E+00 | 5.72E+03 | 1.13E-01 |
| 5.78E+03 | 1.01E+00 | 5.72E+03 | 1.15E-01 |
| 5.79E+03 | 9.46E-01 | 5.72E+03 | 1.17E-01 |
| 5.80E+03 | 9.02E-01 | 5.72E+03 | 1.20E-01 |
| 5.81E+03 | 9.16E-01 | 5.72E+03 | 1.23E-01 |
| 5.82E+03 | 9.56E-01 | 5.72E+03 | 1.26E-01 |
| 5.84E+03 | 1.00E+00 | 5.72E+03 | 1.28E-01 |
| 5.85E+03 | 1.00E+00 | 5.72E+03 | 1.32E-01 |
| 5.86E+03 | 1.00E+00 | 5.72E+03 | 1.35E-01 |
| 5.87E+03 | 9.78E-01 | 5.72E+03 | 1.39E-01 |
| 5.88E+03 | 9.87E-01 | 5.72E+03 | 1.42E-01 |
| 5.89E+03 | 9.85E-01 | 5.72E+03 | 1.45E-01 |
| 5.90E+03 | 1.04E+00 | 5.72E+03 | 1.49E-01 |
| 5.92E+03 | 1.01E+00 | 5.72E+03 | 1.53E-01 |

|          |          |          |          |
|----------|----------|----------|----------|
| 5.93E+03 | 9.55E-01 | 5.72E+03 | 1.57E-01 |
| 5.94E+03 | 9.00E-01 | 5.72E+03 | 1.62E-01 |
| 5.95E+03 | 8.34E-01 | 5.72E+03 | 1.66E-01 |
| 5.96E+03 | 7.71E-01 | 5.72E+03 | 1.71E-01 |
| 5.96E+03 | 7.71E-01 | 5.72E+03 | 1.76E-01 |
| 5.96E+03 | 7.68E-01 | 5.72E+03 | 1.81E-01 |
| 5.96E+03 | 7.69E-01 | 5.72E+03 | 1.87E-01 |
| 5.96E+03 | 7.65E-01 | 5.72E+03 | 1.92E-01 |
| 5.96E+03 | 7.63E-01 | 5.72E+03 | 1.98E-01 |
| 5.96E+03 | 7.58E-01 | 5.72E+03 | 2.03E-01 |
| 5.96E+03 | 7.60E-01 | 5.72E+03 | 2.09E-01 |
| 5.96E+03 | 7.64E-01 | 5.72E+03 | 2.15E-01 |
| 5.96E+03 | 7.64E-01 | 5.72E+03 | 2.21E-01 |
| 5.96E+03 | 7.62E-01 | 5.72E+03 | 2.28E-01 |
| 5.96E+03 | 7.61E-01 | 5.72E+03 | 2.33E-01 |
| 5.96E+03 | 7.59E-01 | 5.72E+03 | 2.40E-01 |
| 5.96E+03 | 7.57E-01 | 5.72E+03 | 2.47E-01 |
| 5.96E+03 | 7.55E-01 | 5.72E+03 | 2.53E-01 |
| 5.96E+03 | 7.54E-01 | 5.72E+03 | 2.59E-01 |
| 5.96E+03 | 7.56E-01 | 5.72E+03 | 2.66E-01 |
| 5.96E+03 | 7.55E-01 | 5.72E+03 | 2.73E-01 |
| 5.96E+03 | 7.53E-01 | 5.72E+03 | 2.80E-01 |
| 5.96E+03 | 7.52E-01 | 5.72E+03 | 2.87E-01 |
| 5.96E+03 | 7.49E-01 | 5.72E+03 | 2.94E-01 |
| 5.96E+03 | 7.50E-01 | 5.72E+03 | 3.02E-01 |
| 5.96E+03 | 7.47E-01 | 5.72E+03 | 3.09E-01 |
| 5.96E+03 | 7.51E-01 | 5.72E+03 | 3.17E-01 |
| 5.97E+03 | 7.42E-01 | 5.72E+03 | 3.26E-01 |
| 5.97E+03 | 7.37E-01 | 5.72E+03 | 3.35E-01 |
| 5.97E+03 | 7.36E-01 | 5.72E+03 | 3.46E-01 |
| 5.97E+03 | 7.38E-01 | 5.72E+03 | 3.56E-01 |
| 5.97E+03 | 7.38E-01 | 5.72E+03 | 3.66E-01 |
| 5.97E+03 | 7.38E-01 | 5.72E+03 | 3.79E-01 |
| 5.97E+03 | 7.40E-01 | 5.72E+03 | 3.90E-01 |
| 5.97E+03 | 7.36E-01 | 5.72E+03 | 4.02E-01 |
| 5.97E+03 | 7.37E-01 | 5.72E+03 | 4.17E-01 |
| 5.97E+03 | 7.36E-01 | 5.72E+03 | 4.31E-01 |
| 5.97E+03 | 7.28E-01 | 5.72E+03 | 4.47E-01 |
| 5.97E+03 | 7.27E-01 | 5.72E+03 | 4.63E-01 |
| 5.97E+03 | 7.27E-01 | 5.72E+03 | 4.79E-01 |
| 5.97E+03 | 7.23E-01 | 5.72E+03 | 4.99E-01 |
| 5.97E+03 | 7.18E-01 | 5.72E+03 | 5.18E-01 |
| 5.97E+03 | 7.15E-01 | 5.72E+03 | 5.40E-01 |

|          |          |          |          |
|----------|----------|----------|----------|
| 5.97E+03 | 7.11E-01 | 5.72E+03 | 5.61E-01 |
| 5.97E+03 | 7.07E-01 | 5.72E+03 | 5.83E-01 |
| 5.97E+03 | 7.03E-01 | 5.72E+03 | 6.11E-01 |
| 5.97E+03 | 6.97E-01 | 5.72E+03 | 6.36E-01 |
| 5.97E+03 | 6.90E-01 | 5.72E+03 | 6.63E-01 |
| 5.97E+03 | 6.87E-01 | 5.72E+03 | 6.95E-01 |
| 5.97E+03 | 6.85E-01 | 5.72E+03 | 7.25E-01 |
| 5.97E+03 | 6.80E-01 | 5.72E+03 | 7.62E-01 |
| 5.97E+03 | 6.76E-01 | 5.72E+03 | 7.95E-01 |
| 5.97E+03 | 6.76E-01 | 5.72E+03 | 8.30E-01 |
| 5.97E+03 | 6.75E-01 | 5.72E+03 | 8.72E-01 |
| 5.97E+03 | 6.78E-01 | 5.72E+03 | 9.11E-01 |
| 5.97E+03 | 6.76E-01 | 5.72E+03 | 9.52E-01 |
| 5.97E+03 | 6.78E-01 | 5.72E+03 | 1.00E+00 |
| 5.97E+03 | 6.73E-01 | 5.72E+03 | 1.04E+00 |
| 5.97E+03 | 6.68E-01 | 5.72E+03 | 1.09E+00 |
| 5.97E+03 | 6.64E-01 | 5.72E+03 | 1.14E+00 |
| 5.98E+03 | 6.67E-01 | 5.72E+03 | 1.19E+00 |
| 5.98E+03 | 6.66E-01 | 5.72E+03 | 1.24E+00 |
| 5.98E+03 | 6.59E-01 | 5.72E+03 | 1.29E+00 |
| 5.98E+03 | 6.61E-01 | 5.72E+03 | 1.34E+00 |
| 5.98E+03 | 6.58E-01 | 5.72E+03 | 1.39E+00 |
| 5.98E+03 | 6.53E-01 | 5.72E+03 | 1.44E+00 |
| 5.98E+03 | 6.53E-01 | 5.72E+03 | 1.49E+00 |
| 5.98E+03 | 6.50E-01 | 5.72E+03 | 1.55E+00 |
| 5.98E+03 | 6.46E-01 | 5.72E+03 | 1.60E+00 |
| 5.98E+03 | 6.42E-01 | 5.72E+03 | 1.65E+00 |
| 5.98E+03 | 6.38E-01 | 5.72E+03 | 1.70E+00 |
| 5.98E+03 | 6.33E-01 | 5.72E+03 | 1.75E+00 |
| 5.98E+03 | 6.32E-01 | 5.72E+03 | 1.80E+00 |
| 5.98E+03 | 6.28E-01 | 5.72E+03 | 1.84E+00 |
| 5.98E+03 | 6.21E-01 | 5.72E+03 | 1.89E+00 |
| 5.98E+03 | 6.20E-01 | 5.72E+03 | 1.93E+00 |
| 5.98E+03 | 6.17E-01 | 5.72E+03 | 1.97E+00 |
| 5.98E+03 | 6.17E-01 | 5.72E+03 | 2.01E+00 |
| 5.98E+03 | 6.16E-01 | 5.72E+03 | 2.06E+00 |
| 5.98E+03 | 6.12E-01 | 5.72E+03 | 2.09E+00 |
| 5.98E+03 | 6.06E-01 | 5.72E+03 | 2.13E+00 |
| 5.98E+03 | 6.04E-01 | 5.72E+03 | 2.17E+00 |
| 5.98E+03 | 6.00E-01 | 5.72E+03 | 2.20E+00 |
| 5.98E+03 | 5.95E-01 | 5.73E+03 | 2.23E+00 |
| 5.98E+03 | 5.96E-01 | 5.73E+03 | 2.26E+00 |
| 5.98E+03 | 5.91E-01 | 5.73E+03 | 2.29E+00 |

|          |          |          |          |
|----------|----------|----------|----------|
| 5.98E+03 | 5.87E-01 | 5.73E+03 | 2.32E+00 |
| 5.98E+03 | 5.84E-01 | 5.73E+03 | 2.34E+00 |
| 5.98E+03 | 5.81E-01 | 5.73E+03 | 2.36E+00 |
| 5.98E+03 | 5.78E-01 | 5.73E+03 | 2.38E+00 |
| 5.98E+03 | 5.73E-01 | 5.73E+03 | 2.40E+00 |
| 5.98E+03 | 5.67E-01 | 5.73E+03 | 2.42E+00 |
| 5.98E+03 | 5.63E-01 | 5.73E+03 | 2.43E+00 |
| 5.98E+03 | 5.57E-01 | 5.73E+03 | 2.44E+00 |
| 5.99E+03 | 5.56E-01 | 5.73E+03 | 2.45E+00 |
| 5.99E+03 | 5.51E-01 | 5.73E+03 | 2.45E+00 |
| 5.99E+03 | 5.44E-01 | 5.73E+03 | 2.45E+00 |
| 5.99E+03 | 5.38E-01 | 5.73E+03 | 2.45E+00 |
| 5.99E+03 | 5.36E-01 | 5.73E+03 | 2.44E+00 |
| 5.99E+03 | 5.31E-01 | 5.73E+03 | 2.44E+00 |
| 5.99E+03 | 5.29E-01 | 5.73E+03 | 2.42E+00 |
| 5.99E+03 | 5.28E-01 | 5.73E+03 | 2.41E+00 |
| 5.99E+03 | 5.27E-01 | 5.73E+03 | 2.40E+00 |
| 5.99E+03 | 5.23E-01 | 5.73E+03 | 2.38E+00 |
| 5.99E+03 | 5.18E-01 | 5.73E+03 | 2.36E+00 |
| 5.99E+03 | 5.15E-01 | 5.73E+03 | 2.33E+00 |
| 5.99E+03 | 5.15E-01 | 5.73E+03 | 2.31E+00 |
| 5.99E+03 | 5.16E-01 | 5.73E+03 | 2.29E+00 |
| 5.99E+03 | 5.14E-01 | 5.73E+03 | 2.26E+00 |
| 5.99E+03 | 5.13E-01 | 5.73E+03 | 2.23E+00 |
| 5.99E+03 | 5.11E-01 | 5.73E+03 | 2.20E+00 |
| 5.99E+03 | 5.02E-01 | 5.73E+03 | 2.17E+00 |
| 5.99E+03 | 4.96E-01 | 5.73E+03 | 2.14E+00 |
| 5.99E+03 | 4.95E-01 | 5.73E+03 | 2.11E+00 |
| 5.99E+03 | 4.88E-01 | 5.73E+03 | 2.08E+00 |
| 5.99E+03 | 4.84E-01 | 5.73E+03 | 2.05E+00 |
| 5.99E+03 | 4.81E-01 | 5.73E+03 | 2.01E+00 |
| 5.99E+03 | 4.78E-01 | 5.73E+03 | 1.98E+00 |
| 5.99E+03 | 4.74E-01 | 5.73E+03 | 1.95E+00 |
| 5.99E+03 | 4.71E-01 | 5.73E+03 | 1.92E+00 |
| 5.99E+03 | 4.63E-01 | 5.73E+03 | 1.89E+00 |
| 5.99E+03 | 4.61E-01 | 5.73E+03 | 1.86E+00 |
| 5.99E+03 | 4.57E-01 | 5.73E+03 | 1.83E+00 |
| 5.99E+03 | 4.52E-01 | 5.73E+03 | 1.80E+00 |
| 5.99E+03 | 4.48E-01 | 5.73E+03 | 1.77E+00 |
| 5.99E+03 | 4.37E-01 | 5.73E+03 | 1.74E+00 |
| 5.99E+03 | 4.33E-01 | 5.73E+03 | 1.71E+00 |
| 6.00E+03 | 4.27E-01 | 5.73E+03 | 1.69E+00 |
| 6.00E+03 | 4.21E-01 | 5.73E+03 | 1.66E+00 |

|          |          |          |          |
|----------|----------|----------|----------|
| 6.00E+03 | 4.21E-01 | 5.73E+03 | 1.63E+00 |
| 6.00E+03 | 4.18E-01 | 5.73E+03 | 1.61E+00 |
| 6.00E+03 | 4.11E-01 | 5.73E+03 | 1.58E+00 |
| 6.00E+03 | 4.13E-01 | 5.73E+03 | 1.56E+00 |
| 6.00E+03 | 4.08E-01 | 5.73E+03 | 1.54E+00 |
| 6.00E+03 | 4.07E-01 | 5.73E+03 | 1.51E+00 |
| 6.00E+03 | 4.07E-01 | 5.73E+03 | 1.49E+00 |
| 6.00E+03 | 4.06E-01 | 5.73E+03 | 1.47E+00 |
| 6.00E+03 | 3.99E-01 | 5.73E+03 | 1.45E+00 |
| 6.00E+03 | 3.96E-01 | 5.73E+03 | 1.43E+00 |
| 6.00E+03 | 3.93E-01 | 5.73E+03 | 1.41E+00 |
| 6.00E+03 | 3.90E-01 | 5.73E+03 | 1.39E+00 |
| 6.00E+03 | 3.86E-01 | 5.73E+03 | 1.37E+00 |
| 6.00E+03 | 3.82E-01 | 5.73E+03 | 1.36E+00 |
| 6.00E+03 | 3.79E-01 | 5.73E+03 | 1.34E+00 |
| 6.00E+03 | 3.76E-01 | 5.73E+03 | 1.32E+00 |
| 6.00E+03 | 3.68E-01 | 5.73E+03 | 1.31E+00 |
| 6.00E+03 | 3.62E-01 | 5.73E+03 | 1.29E+00 |
| 6.00E+03 | 3.59E-01 | 5.73E+03 | 1.28E+00 |
| 6.00E+03 | 3.58E-01 | 5.73E+03 | 1.26E+00 |
| 6.00E+03 | 3.55E-01 | 5.73E+03 | 1.25E+00 |
| 6.00E+03 | 3.45E-01 | 5.73E+03 | 1.23E+00 |
| 6.00E+03 | 3.44E-01 | 5.73E+03 | 1.22E+00 |
| 6.00E+03 | 3.40E-01 | 5.73E+03 | 1.21E+00 |
| 6.00E+03 | 3.33E-01 | 5.73E+03 | 1.19E+00 |
| 6.00E+03 | 3.29E-01 | 5.73E+03 | 1.18E+00 |
| 6.00E+03 | 3.23E-01 | 5.73E+03 | 1.17E+00 |
| 6.00E+03 | 3.15E-01 | 5.73E+03 | 1.16E+00 |
| 6.00E+03 | 3.06E-01 | 5.73E+03 | 1.15E+00 |
| 6.00E+03 | 3.06E-01 | 5.73E+03 | 1.14E+00 |
| 6.00E+03 | 3.06E-01 | 5.73E+03 | 1.12E+00 |
| 6.00E+03 | 3.01E-01 | 5.73E+03 | 1.11E+00 |
| 6.01E+03 | 2.92E-01 | 5.73E+03 | 1.10E+00 |
| 6.01E+03 | 2.86E-01 | 5.73E+03 | 1.09E+00 |
| 6.01E+03 | 2.82E-01 | 5.73E+03 | 1.09E+00 |
| 6.01E+03 | 2.82E-01 | 5.73E+03 | 1.08E+00 |
| 6.01E+03 | 2.78E-01 | 5.73E+03 | 1.07E+00 |
| 6.01E+03 | 2.73E-01 | 5.73E+03 | 1.06E+00 |
| 6.01E+03 | 2.73E-01 | 5.73E+03 | 1.05E+00 |
| 6.01E+03 | 2.62E-01 | 5.73E+03 | 1.04E+00 |
| 6.01E+03 | 2.59E-01 | 5.73E+03 | 1.04E+00 |
| 6.01E+03 | 2.57E-01 | 5.73E+03 | 1.03E+00 |
| 6.01E+03 | 2.49E-01 | 5.73E+03 | 1.02E+00 |

|          |           |          |          |
|----------|-----------|----------|----------|
| 6.01E+03 | 2.40E-01  | 5.73E+03 | 1.02E+00 |
| 6.01E+03 | 2.36E-01  | 5.73E+03 | 1.01E+00 |
| 6.01E+03 | 2.31E-01  | 5.73E+03 | 1.00E+00 |
| 6.01E+03 | 2.29E-01  | 5.73E+03 | 9.98E-01 |
| 6.01E+03 | 2.25E-01  | 5.73E+03 | 9.92E-01 |
| 6.01E+03 | 2.22E-01  | 5.73E+03 | 9.86E-01 |
| 6.01E+03 | 2.19E-01  | 5.73E+03 | 9.81E-01 |
| 6.01E+03 | 2.12E-01  | 5.73E+03 | 9.76E-01 |
| 6.01E+03 | 2.04E-01  | 5.73E+03 | 9.71E-01 |
| 6.01E+03 | 1.99E-01  | 5.73E+03 | 9.66E-01 |
| 6.01E+03 | 1.99E-01  | 5.73E+03 | 9.62E-01 |
| 6.01E+03 | 1.92E-01  | 5.74E+03 | 9.57E-01 |
| 6.01E+03 | 1.92E-01  | 5.74E+03 | 9.53E-01 |
| 6.01E+03 | 1.92E-01  | 5.74E+03 | 9.49E-01 |
| 6.01E+03 | 1.83E-01  | 5.74E+03 | 9.45E-01 |
| 6.01E+03 | 1.78E-01  | 5.74E+03 | 9.42E-01 |
| 6.01E+03 | 1.75E-01  | 5.74E+03 | 9.38E-01 |
| 6.01E+03 | 1.73E-01  | 5.74E+03 | 9.34E-01 |
| 6.01E+03 | 1.68E-01  | 5.74E+03 | 9.31E-01 |
| 6.01E+03 | 1.61E-01  | 5.74E+03 | 9.28E-01 |
| 6.01E+03 | 1.62E-01  | 5.74E+03 | 9.24E-01 |
| 6.01E+03 | 1.56E-01  | 5.74E+03 | 9.21E-01 |
| 6.02E+03 | 1.55E-01  | 5.74E+03 | 9.18E-01 |
| 6.02E+03 | 1.58E-01  | 5.74E+03 | 9.15E-01 |
| 6.02E+03 | 1.53E-01  | 5.74E+03 | 9.12E-01 |
| 6.02E+03 | 1.52E-01  | 5.74E+03 | 9.10E-01 |
| 6.02E+03 | 1.51E-01  | 5.74E+03 | 9.07E-01 |
| 6.02E+03 | 1.43E-01  | 5.74E+03 | 9.04E-01 |
| 6.02E+03 | 1.36E-01  | 5.74E+03 | 9.01E-01 |
| 6.02E+03 | 1.25E-01  | 5.74E+03 | 8.98E-01 |
| 6.02E+03 | 1.24E-01  | 5.74E+03 | 8.96E-01 |
| 6.02E+03 | 1.21E-01  | 5.74E+03 | 8.93E-01 |
| 6.02E+03 | 1.17E-01  | 5.74E+03 | 8.91E-01 |
| 6.02E+03 | 1.07E-01  | 5.74E+03 | 8.88E-01 |
| 6.02E+03 | 1.01E-01  | 5.74E+03 | 8.86E-01 |
| 6.02E+03 | 9.90E-02  | 5.74E+03 | 8.84E-01 |
| 6.02E+03 | 9.62E-02  | 5.74E+03 | 8.82E-01 |
| 6.02E+03 | 1.71E-02  | 5.74E+03 | 8.80E-01 |
| 6.03E+03 | -6.70E-02 | 5.74E+03 | 8.77E-01 |
| 6.03E+03 | -1.60E-01 | 5.74E+03 | 8.75E-01 |
| 6.04E+03 | -2.62E-01 | 5.74E+03 | 8.74E-01 |
| 6.04E+03 | -3.63E-01 | 5.74E+03 | 8.71E-01 |
|          |           | 5.74E+03 | 8.69E-01 |

|          |          |
|----------|----------|
| 5.74E+03 | 8.67E-01 |
| 5.74E+03 | 8.65E-01 |
| 5.74E+03 | 8.63E-01 |
| 5.74E+03 | 8.61E-01 |
| 5.74E+03 | 8.59E-01 |
| 5.74E+03 | 8.57E-01 |
| 5.74E+03 | 8.56E-01 |
| 5.74E+03 | 8.54E-01 |
| 5.74E+03 | 8.52E-01 |
| 5.74E+03 | 8.50E-01 |
| 5.74E+03 | 8.48E-01 |
| 5.74E+03 | 8.47E-01 |
| 5.74E+03 | 8.45E-01 |
| 5.74E+03 | 8.43E-01 |
| 5.74E+03 | 8.42E-01 |
| 5.74E+03 | 8.40E-01 |
| 5.74E+03 | 8.38E-01 |
| 5.74E+03 | 8.37E-01 |
| 5.74E+03 | 8.36E-01 |
| 5.74E+03 | 8.34E-01 |
| 5.74E+03 | 8.33E-01 |
| 5.74E+03 | 8.31E-01 |
| 5.74E+03 | 8.30E-01 |
| 5.74E+03 | 8.29E-01 |
| 5.74E+03 | 8.27E-01 |
| 5.74E+03 | 8.26E-01 |
| 5.74E+03 | 8.25E-01 |
| 5.74E+03 | 8.24E-01 |
| 5.74E+03 | 8.23E-01 |
| 5.74E+03 | 8.22E-01 |
| 5.74E+03 | 8.21E-01 |
| 5.74E+03 | 8.20E-01 |
| 5.74E+03 | 8.19E-01 |
| 5.74E+03 | 8.19E-01 |
| 5.74E+03 | 8.18E-01 |
| 5.74E+03 | 8.17E-01 |
| 5.74E+03 | 8.16E-01 |
| 5.74E+03 | 8.16E-01 |
| 5.74E+03 | 8.15E-01 |
| 5.74E+03 | 8.15E-01 |
| 5.74E+03 | 8.14E-01 |
| 5.74E+03 | 8.14E-01 |
| 5.74E+03 | 8.13E-01 |



|          |          |
|----------|----------|
| 5.74E+03 | 8.13E-01 |
| 5.74E+03 | 8.13E-01 |
| 5.74E+03 | 8.12E-01 |
| 5.74E+03 | 8.12E-01 |
| 5.74E+03 | 8.12E-01 |
| 5.74E+03 | 8.12E-01 |
| 5.74E+03 | 8.12E-01 |
| 5.74E+03 | 8.12E-01 |
| 5.74E+03 | 8.12E-01 |
| 5.74E+03 | 8.12E-01 |
| 5.74E+03 | 8.12E-01 |
| 5.74E+03 | 8.12E-01 |
| 5.74E+03 | 8.12E-01 |
| 5.74E+03 | 8.12E-01 |
| 5.74E+03 | 8.13E-01 |
| 5.74E+03 | 8.13E-01 |
| 5.74E+03 | 8.13E-01 |
| 5.74E+03 | 8.14E-01 |
| 5.74E+03 | 8.14E-01 |
| 5.74E+03 | 8.15E-01 |
| 5.74E+03 | 8.15E-01 |
| 5.74E+03 | 8.16E-01 |
| 5.74E+03 | 8.17E-01 |
| 5.74E+03 | 8.17E-01 |
| 5.74E+03 | 8.18E-01 |
| 5.75E+03 | 8.19E-01 |
| 5.75E+03 | 8.19E-01 |
| 5.75E+03 | 8.20E-01 |
| 5.75E+03 | 8.21E-01 |
| 5.75E+03 | 8.22E-01 |
| 5.75E+03 | 8.23E-01 |
| 5.75E+03 | 8.24E-01 |
| 5.75E+03 | 8.25E-01 |
| 5.75E+03 | 8.26E-01 |
| 5.75E+03 | 8.27E-01 |
| 5.75E+03 | 8.28E-01 |
| 5.75E+03 | 8.29E-01 |
| 5.75E+03 | 8.31E-01 |
| 5.75E+03 | 8.32E-01 |
| 5.75E+03 | 8.33E-01 |
| 5.75E+03 | 8.35E-01 |
| 5.75E+03 | 8.36E-01 |
| 5.75E+03 | 8.37E-01 |

|          |          |
|----------|----------|
| 5.75E+03 | 8.39E-01 |
| 5.75E+03 | 8.41E-01 |
| 5.75E+03 | 8.42E-01 |
| 5.75E+03 | 8.44E-01 |
| 5.75E+03 | 8.45E-01 |
| 5.75E+03 | 8.47E-01 |
| 5.75E+03 | 8.49E-01 |
| 5.75E+03 | 8.51E-01 |
| 5.75E+03 | 8.53E-01 |
| 5.75E+03 | 8.54E-01 |
| 5.75E+03 | 8.56E-01 |
| 5.75E+03 | 8.58E-01 |
| 5.75E+03 | 8.60E-01 |
| 5.75E+03 | 8.62E-01 |
| 5.75E+03 | 8.64E-01 |
| 5.75E+03 | 8.66E-01 |
| 5.75E+03 | 8.68E-01 |
| 5.75E+03 | 8.70E-01 |
| 5.75E+03 | 8.72E-01 |
| 5.75E+03 | 8.74E-01 |
| 5.75E+03 | 8.77E-01 |
| 5.75E+03 | 8.79E-01 |
| 5.75E+03 | 8.81E-01 |
| 5.75E+03 | 8.83E-01 |
| 5.75E+03 | 8.86E-01 |
| 5.75E+03 | 8.88E-01 |
| 5.75E+03 | 8.90E-01 |
| 5.75E+03 | 8.93E-01 |
| 5.75E+03 | 8.95E-01 |
| 5.75E+03 | 8.97E-01 |
| 5.75E+03 | 9.00E-01 |
| 5.75E+03 | 9.02E-01 |
| 5.75E+03 | 9.04E-01 |
| 5.75E+03 | 9.07E-01 |
| 5.75E+03 | 9.10E-01 |
| 5.75E+03 | 9.12E-01 |
| 5.75E+03 | 9.14E-01 |
| 5.75E+03 | 9.17E-01 |
| 5.75E+03 | 9.19E-01 |
| 5.75E+03 | 9.22E-01 |
| 5.75E+03 | 9.24E-01 |
| 5.75E+03 | 9.26E-01 |
| 5.75E+03 | 9.29E-01 |



|          |          |
|----------|----------|
| 5.76E+03 | 9.96E-01 |
| 5.76E+03 | 9.94E-01 |
| 5.76E+03 | 9.93E-01 |
| 5.76E+03 | 9.92E-01 |
| 5.76E+03 | 9.91E-01 |
| 5.76E+03 | 9.90E-01 |
| 5.76E+03 | 9.89E-01 |
| 5.76E+03 | 9.87E-01 |
| 5.76E+03 | 9.85E-01 |
| 5.76E+03 | 9.84E-01 |
| 5.76E+03 | 9.83E-01 |
| 5.76E+03 | 9.81E-01 |
| 5.77E+03 | 9.80E-01 |
| 5.77E+03 | 9.79E-01 |
| 5.77E+03 | 9.77E-01 |
| 5.77E+03 | 9.76E-01 |
| 5.77E+03 | 9.74E-01 |
| 5.77E+03 | 9.73E-01 |
| 5.77E+03 | 9.71E-01 |
| 5.77E+03 | 9.70E-01 |
| 5.77E+03 | 9.68E-01 |
| 5.77E+03 | 9.66E-01 |
| 5.77E+03 | 9.65E-01 |
| 5.77E+03 | 9.61E-01 |
| 5.77E+03 | 9.60E-01 |
| 5.77E+03 | 9.59E-01 |
| 5.77E+03 | 9.57E-01 |
| 5.77E+03 | 9.55E-01 |
| 5.77E+03 | 9.54E-01 |
| 5.77E+03 | 9.52E-01 |
| 5.77E+03 | 9.50E-01 |
| 5.77E+03 | 9.48E-01 |
| 5.77E+03 | 9.46E-01 |
| 5.77E+03 | 9.44E-01 |
| 5.77E+03 | 9.43E-01 |
| 5.77E+03 | 9.41E-01 |
| 5.77E+03 | 9.39E-01 |
| 5.77E+03 | 9.37E-01 |
| 5.77E+03 | 9.34E-01 |
| 5.77E+03 | 9.32E-01 |
| 5.77E+03 | 9.30E-01 |
| 5.77E+03 | 9.29E-01 |
| 5.77E+03 | 9.27E-01 |

|          |          |
|----------|----------|
| 5.77E+03 | 9.25E-01 |
| 5.77E+03 | 9.23E-01 |
| 5.78E+03 | 9.21E-01 |
| 5.78E+03 | 9.19E-01 |
| 5.78E+03 | 9.17E-01 |
| 5.78E+03 | 9.16E-01 |
| 5.78E+03 | 9.14E-01 |
| 5.78E+03 | 9.13E-01 |
| 5.78E+03 | 9.11E-01 |
| 5.78E+03 | 9.10E-01 |
| 5.78E+03 | 9.08E-01 |
| 5.78E+03 | 9.07E-01 |
| 5.78E+03 | 9.06E-01 |
| 5.78E+03 | 9.05E-01 |
| 5.78E+03 | 9.03E-01 |
| 5.78E+03 | 9.03E-01 |
| 5.78E+03 | 9.02E-01 |
| 5.78E+03 | 9.01E-01 |
| 5.78E+03 | 9.00E-01 |
| 5.78E+03 | 8.99E-01 |
| 5.78E+03 | 8.98E-01 |
| 5.78E+03 | 8.98E-01 |
| 5.78E+03 | 8.97E-01 |
| 5.78E+03 | 8.97E-01 |
| 5.78E+03 | 8.96E-01 |
| 5.78E+03 | 8.96E-01 |
| 5.78E+03 | 8.96E-01 |
| 5.78E+03 | 8.96E-01 |
| 5.78E+03 | 8.96E-01 |
| 5.78E+03 | 8.96E-01 |
| 5.78E+03 | 8.96E-01 |
| 5.78E+03 | 8.96E-01 |
| 5.78E+03 | 8.96E-01 |
| 5.78E+03 | 8.96E-01 |
| 5.78E+03 | 8.97E-01 |
| 5.79E+03 | 8.97E-01 |
| 5.79E+03 | 8.98E-01 |
| 5.79E+03 | 8.98E-01 |
| 5.79E+03 | 8.98E-01 |
| 5.79E+03 | 8.99E-01 |
| 5.79E+03 | 9.00E-01 |
| 5.79E+03 | 9.01E-01 |
| 5.79E+03 | 9.01E-01 |

|          |          |
|----------|----------|
| 5.79E+03 | 9.02E-01 |
| 5.79E+03 | 9.03E-01 |
| 5.79E+03 | 9.03E-01 |
| 5.79E+03 | 9.04E-01 |
| 5.79E+03 | 9.05E-01 |
| 5.79E+03 | 9.06E-01 |
| 5.79E+03 | 9.07E-01 |
| 5.79E+03 | 9.08E-01 |
| 5.79E+03 | 9.09E-01 |
| 5.79E+03 | 9.10E-01 |
| 5.79E+03 | 9.11E-01 |
| 5.79E+03 | 9.12E-01 |
| 5.79E+03 | 9.13E-01 |
| 5.79E+03 | 9.14E-01 |
| 5.79E+03 | 9.15E-01 |
| 5.79E+03 | 9.17E-01 |
| 5.80E+03 | 9.31E-01 |
| 5.80E+03 | 9.44E-01 |
| 5.80E+03 | 9.56E-01 |
| 5.81E+03 | 9.67E-01 |
| 5.81E+03 | 9.73E-01 |
| 5.81E+03 | 9.74E-01 |
| 5.81E+03 | 9.73E-01 |
| 5.82E+03 | 9.69E-01 |
| 5.82E+03 | 9.64E-01 |
| 5.82E+03 | 9.62E-01 |
| 5.83E+03 | 9.61E-01 |
| 5.83E+03 | 9.60E-01 |
| 5.83E+03 | 9.59E-01 |
| 5.84E+03 | 9.57E-01 |
| 5.84E+03 | 9.57E-01 |
| 5.84E+03 | 9.59E-01 |
| 5.85E+03 | 9.66E-01 |
| 5.85E+03 | 9.73E-01 |
| 5.85E+03 | 9.77E-01 |
| 5.86E+03 | 9.80E-01 |
| 5.86E+03 | 9.82E-01 |
| 5.86E+03 | 9.83E-01 |
| 5.86E+03 | 9.84E-01 |
| 5.87E+03 | 9.87E-01 |
| 5.87E+03 | 9.89E-01 |
| 5.87E+03 | 9.92E-01 |
| 5.88E+03 | 9.94E-01 |







|          |          |
|----------|----------|
| 5.98E+03 | 1.09E+00 |
| 5.98E+03 | 1.09E+00 |
| 5.98E+03 | 1.09E+00 |
| 5.98E+03 | 1.09E+00 |
| 5.98E+03 | 1.09E+00 |
| 5.98E+03 | 1.09E+00 |
| 5.98E+03 | 1.10E+00 |
| 5.98E+03 | 1.10E+00 |
| 5.98E+03 | 1.10E+00 |
| 5.98E+03 | 1.10E+00 |
| 5.98E+03 | 1.10E+00 |
| 5.98E+03 | 1.10E+00 |
| 5.98E+03 | 1.10E+00 |
| 5.98E+03 | 1.10E+00 |
| 5.98E+03 | 1.10E+00 |
| 5.98E+03 | 1.10E+00 |
| 5.98E+03 | 1.10E+00 |
| 5.98E+03 | 1.10E+00 |
| 5.98E+03 | 1.10E+00 |
| 5.98E+03 | 1.10E+00 |
| 5.98E+03 | 1.10E+00 |
| 5.98E+03 | 1.10E+00 |
| 5.98E+03 | 1.11E+00 |
| 5.98E+03 | 1.11E+00 |
| 5.98E+03 | 1.11E+00 |
| 5.98E+03 | 1.11E+00 |
| 5.98E+03 | 1.11E+00 |
| 5.98E+03 | 1.11E+00 |
| 5.98E+03 | 1.11E+00 |
| 5.98E+03 | 1.11E+00 |
| 5.98E+03 | 1.11E+00 |
| 5.98E+03 | 1.11E+00 |
| 5.98E+03 | 1.11E+00 |
| 5.98E+03 | 1.11E+00 |
| 5.98E+03 | 1.12E+00 |
| 5.98E+03 | 1.12E+00 |
| 5.98E+03 | 1.12E+00 |
| 5.98E+03 | 1.12E+00 |
| 5.99E+03 | 1.12E+00 |
| 5.99E+03 | 1.12E+00 |
| 5.99E+03 | 1.12E+00 |
| 5.99E+03 | 1.13E+00 |
| 5.99E+03 | 1.13E+00 |
| 5.99E+03 | 1.13E+00 |
| 5.99E+03 | 1.13E+00 |
| 5.99E+03 | 1.13E+00 |
| 5.99E+03 | 1.13E+00 |
| 5.99E+03 | 1.14E+00 |
| 5.99E+03 | 1.14E+00 |
| 5.99E+03 | 1.14E+00 |
| 5.99E+03 | 1.14E+00 |
| 5.99E+03 | 1.14E+00 |
| 5.99E+03 | 1.14E+00 |
| 5.99E+03 | 1.15E+00 |
| 5.99E+03 | 1.15E+00 |

|          |          |
|----------|----------|
| 5.99E+03 | 1.15E+00 |
| 5.99E+03 | 1.16E+00 |
| 5.99E+03 | 1.16E+00 |
| 5.99E+03 | 1.16E+00 |
| 5.99E+03 | 1.17E+00 |
| 5.99E+03 | 1.17E+00 |
| 5.99E+03 | 1.18E+00 |
| 5.99E+03 | 1.18E+00 |
| 5.99E+03 | 1.19E+00 |
| 5.99E+03 | 1.20E+00 |
| 5.99E+03 | 1.21E+00 |
| 5.99E+03 | 1.21E+00 |
| 5.99E+03 | 1.22E+00 |
| 5.99E+03 | 1.23E+00 |
| 5.99E+03 | 1.25E+00 |
| 5.99E+03 | 1.26E+00 |
| 5.99E+03 | 1.28E+00 |
| 5.99E+03 | 1.30E+00 |
| 5.99E+03 | 1.32E+00 |
| 5.99E+03 | 1.35E+00 |
| 5.99E+03 | 1.38E+00 |
| 5.99E+03 | 1.42E+00 |
| 5.99E+03 | 1.46E+00 |
| 5.99E+03 | 1.50E+00 |
| 5.99E+03 | 1.56E+00 |
| 5.99E+03 | 1.61E+00 |
| 5.99E+03 | 1.67E+00 |
| 5.99E+03 | 1.73E+00 |
| 5.99E+03 | 1.78E+00 |
| 5.99E+03 | 1.83E+00 |
| 5.99E+03 | 1.88E+00 |
| 5.99E+03 | 1.91E+00 |
| 5.99E+03 | 1.95E+00 |
| 5.99E+03 | 1.98E+00 |
| 5.99E+03 | 2.01E+00 |
| 5.99E+03 | 2.04E+00 |
| 5.99E+03 | 2.07E+00 |
| 5.99E+03 | 2.10E+00 |
| 5.99E+03 | 2.12E+00 |
| 5.99E+03 | 2.15E+00 |
| 5.99E+03 | 2.18E+00 |
| 5.99E+03 | 2.20E+00 |
| 5.99E+03 | 2.23E+00 |

|          |          |
|----------|----------|
| 5.99E+03 | 2.25E+00 |
| 5.99E+03 | 2.27E+00 |
| 5.99E+03 | 2.30E+00 |
| 5.99E+03 | 2.32E+00 |
| 5.99E+03 | 2.34E+00 |
| 5.99E+03 | 2.36E+00 |
| 5.99E+03 | 2.38E+00 |
| 5.99E+03 | 2.40E+00 |
| 5.99E+03 | 2.42E+00 |
| 5.99E+03 | 2.44E+00 |
| 5.99E+03 | 2.46E+00 |
| 5.99E+03 | 2.48E+00 |
| 5.99E+03 | 2.50E+00 |
| 5.99E+03 | 2.52E+00 |
| 5.99E+03 | 2.53E+00 |
| 5.99E+03 | 2.55E+00 |
| 5.99E+03 | 2.57E+00 |
| 5.99E+03 | 2.58E+00 |
| 5.99E+03 | 2.60E+00 |
| 5.99E+03 | 2.62E+00 |
| 5.99E+03 | 2.63E+00 |
| 5.99E+03 | 2.64E+00 |
| 5.99E+03 | 2.66E+00 |
| 5.99E+03 | 2.67E+00 |
| 5.99E+03 | 2.68E+00 |
| 5.99E+03 | 2.69E+00 |
| 5.99E+03 | 2.70E+00 |
| 5.99E+03 | 2.71E+00 |
| 5.99E+03 | 2.72E+00 |
| 5.99E+03 | 2.73E+00 |
| 5.99E+03 | 2.73E+00 |
| 5.99E+03 | 2.74E+00 |
| 5.99E+03 | 2.75E+00 |
| 5.99E+03 | 2.75E+00 |
| 5.99E+03 | 2.75E+00 |
| 5.99E+03 | 2.76E+00 |
| 5.99E+03 | 2.76E+00 |
| 5.99E+03 | 2.76E+00 |
| 5.99E+03 | 2.76E+00 |
| 5.99E+03 | 2.76E+00 |
| 5.99E+03 | 2.76E+00 |
| 5.99E+03 | 2.76E+00 |
| 5.99E+03 | 2.76E+00 |
| 5.99E+03 | 2.76E+00 |

|          |          |
|----------|----------|
| 6.00E+03 | 2.76E+00 |
| 6.00E+03 | 2.76E+00 |
| 6.00E+03 | 2.75E+00 |
| 6.00E+03 | 2.75E+00 |
| 6.00E+03 | 2.75E+00 |
| 6.00E+03 | 2.75E+00 |
| 6.00E+03 | 2.75E+00 |
| 6.00E+03 | 2.75E+00 |
| 6.00E+03 | 2.75E+00 |
| 6.00E+03 | 2.76E+00 |
| 6.00E+03 | 2.76E+00 |
| 6.00E+03 | 2.77E+00 |
| 6.00E+03 | 2.78E+00 |
| 6.00E+03 | 2.79E+00 |
| 6.00E+03 | 2.80E+00 |
| 6.00E+03 | 2.81E+00 |
| 6.00E+03 | 2.83E+00 |
| 6.00E+03 | 2.84E+00 |
| 6.00E+03 | 2.86E+00 |
| 6.00E+03 | 2.88E+00 |
| 6.00E+03 | 2.91E+00 |
| 6.00E+03 | 2.93E+00 |
| 6.00E+03 | 2.96E+00 |
| 6.00E+03 | 2.98E+00 |
| 6.00E+03 | 3.01E+00 |
| 6.00E+03 | 3.04E+00 |
| 6.00E+03 | 3.06E+00 |
| 6.00E+03 | 3.09E+00 |
| 6.00E+03 | 3.12E+00 |
| 6.00E+03 | 3.15E+00 |
| 6.00E+03 | 3.18E+00 |
| 6.00E+03 | 3.20E+00 |
| 6.00E+03 | 3.23E+00 |
| 6.00E+03 | 3.26E+00 |
| 6.00E+03 | 3.28E+00 |
| 6.00E+03 | 3.31E+00 |
| 6.00E+03 | 3.34E+00 |
| 6.00E+03 | 3.36E+00 |
| 6.00E+03 | 3.39E+00 |
| 6.00E+03 | 3.41E+00 |
| 6.00E+03 | 3.44E+00 |
| 6.00E+03 | 3.46E+00 |

|          |          |
|----------|----------|
| 6.00E+03 | 3.49E+00 |
| 6.00E+03 | 3.51E+00 |
| 6.00E+03 | 3.53E+00 |
| 6.00E+03 | 3.55E+00 |
| 6.00E+03 | 3.57E+00 |
| 6.00E+03 | 3.59E+00 |
| 6.00E+03 | 3.61E+00 |
| 6.00E+03 | 3.63E+00 |
| 6.00E+03 | 3.65E+00 |
| 6.00E+03 | 3.67E+00 |
| 6.00E+03 | 3.69E+00 |
| 6.00E+03 | 3.70E+00 |
| 6.00E+03 | 3.72E+00 |
| 6.00E+03 | 3.73E+00 |
| 6.00E+03 | 3.75E+00 |
| 6.00E+03 | 3.76E+00 |
| 6.00E+03 | 3.77E+00 |
| 6.00E+03 | 3.79E+00 |
| 6.00E+03 | 3.80E+00 |
| 6.00E+03 | 3.81E+00 |
| 6.00E+03 | 3.83E+00 |
| 6.00E+03 | 3.84E+00 |
| 6.00E+03 | 3.85E+00 |
| 6.00E+03 | 3.86E+00 |
| 6.00E+03 | 3.88E+00 |
| 6.00E+03 | 3.89E+00 |
| 6.00E+03 | 3.90E+00 |
| 6.00E+03 | 3.91E+00 |
| 6.00E+03 | 3.92E+00 |
| 6.00E+03 | 3.93E+00 |
| 6.00E+03 | 3.94E+00 |
| 6.00E+03 | 3.95E+00 |
| 6.00E+03 | 3.96E+00 |
| 6.00E+03 | 3.97E+00 |
| 6.00E+03 | 3.98E+00 |
| 6.00E+03 | 3.99E+00 |
| 6.00E+03 | 4.00E+00 |
| 6.00E+03 | 4.01E+00 |
| 6.00E+03 | 4.02E+00 |
| 6.00E+03 | 4.03E+00 |
| 6.00E+03 | 4.04E+00 |
| 6.00E+03 | 4.05E+00 |
| 6.00E+03 | 4.06E+00 |

|          |          |
|----------|----------|
| 6.00E+03 | 4.07E+00 |
| 6.00E+03 | 4.08E+00 |
| 6.00E+03 | 4.09E+00 |
| 6.00E+03 | 4.09E+00 |
| 6.00E+03 | 4.10E+00 |
| 6.00E+03 | 4.11E+00 |
| 6.00E+03 | 4.12E+00 |
| 6.00E+03 | 4.13E+00 |
| 6.00E+03 | 4.14E+00 |
| 6.00E+03 | 4.14E+00 |
| 6.00E+03 | 4.15E+00 |
| 6.00E+03 | 4.16E+00 |
| 6.00E+03 | 4.17E+00 |
| 6.00E+03 | 4.18E+00 |
| 6.01E+03 | 4.19E+00 |
| 6.01E+03 | 4.20E+00 |
| 6.01E+03 | 4.21E+00 |
| 6.01E+03 | 4.21E+00 |
| 6.01E+03 | 4.22E+00 |
| 6.01E+03 | 4.23E+00 |
| 6.01E+03 | 4.24E+00 |
| 6.01E+03 | 4.25E+00 |
| 6.01E+03 | 4.26E+00 |
| 6.01E+03 | 4.27E+00 |
| 6.01E+03 | 4.28E+00 |
| 6.01E+03 | 4.29E+00 |
| 6.01E+03 | 4.29E+00 |
| 6.01E+03 | 4.30E+00 |
| 6.01E+03 | 4.31E+00 |
| 6.01E+03 | 4.32E+00 |
| 6.01E+03 | 4.33E+00 |
| 6.01E+03 | 4.34E+00 |
| 6.01E+03 | 4.34E+00 |
| 6.01E+03 | 4.35E+00 |
| 6.01E+03 | 4.36E+00 |
| 6.01E+03 | 4.37E+00 |
| 6.01E+03 | 4.38E+00 |
| 6.01E+03 | 4.39E+00 |
| 6.01E+03 | 4.40E+00 |
| 6.01E+03 | 4.40E+00 |
| 6.01E+03 | 4.41E+00 |
| 6.01E+03 | 4.42E+00 |
| 6.01E+03 | 4.43E+00 |

|          |          |
|----------|----------|
| 6.01E+03 | 4.44E+00 |
| 6.01E+03 | 4.45E+00 |
| 6.01E+03 | 4.46E+00 |
| 6.01E+03 | 4.47E+00 |
| 6.01E+03 | 4.48E+00 |
| 6.01E+03 | 4.48E+00 |
| 6.01E+03 | 4.49E+00 |
| 6.01E+03 | 4.50E+00 |
| 6.01E+03 | 4.50E+00 |
| 6.01E+03 | 4.51E+00 |
| 6.01E+03 | 4.51E+00 |
| 6.01E+03 | 4.52E+00 |
| 6.01E+03 | 4.52E+00 |
| 6.01E+03 | 4.52E+00 |
| 6.01E+03 | 4.52E+00 |
| 6.01E+03 | 4.52E+00 |
| 6.01E+03 | 4.51E+00 |
| 6.01E+03 | 4.51E+00 |
| 6.01E+03 | 4.51E+00 |
| 6.01E+03 | 4.50E+00 |
| 6.01E+03 | 4.49E+00 |
| 6.01E+03 | 4.49E+00 |
| 6.01E+03 | 4.48E+00 |
| 6.01E+03 | 4.47E+00 |
| 6.01E+03 | 4.46E+00 |
| 6.01E+03 | 4.45E+00 |

## Crystallographic Analyses

Crystals suitable for X-ray diffraction were covered in paratone oil in a glove box and transferred to the diffractometer in a 20-mL capped vial. Crystals were mounted on a loop with paratone oil on a Bruker D8 VENTURE diffractometer. The crystals were cooled and kept at  $T = 100(2)$  K during data collections. The structures were solved with the ShelXT structure solution program using the Intrinsic Phasing solution method and by using Olex2 as the graphical interface.<sup>6, 7</sup> The model was refined with version 2014/7 of XL using Least Squares minimization.<sup>8</sup> Structures were visualized in Mercury and graphics were generated with POV-ray.<sup>9, 10</sup>

### Further Refinement Details:

In order to obtain reasonable chemical constraints (1,2 and 1,3 distance constraints) for the disordered groups (piperidine) during the X-ray refinements for **1-K**, the molecular structure was optimized using Orca 4.2.1 using the PBE method and the def2-SVP basis and a multiplicity of 1. Normal or default parameters were used for optimization.<sup>11</sup>

Both complex **1-Ce** and **2-Ce** contained extensively disordered solvent in the crystal lattice. The solvent was too disordered to model reliably and therefore treated by solvent masking in Olex2. The treatment gave 72 electrons for each unit cell in **1-Ce** and 115 electrons for **2-Ce**. This corresponds to approximately 2 and 3 pentane molecules respectively or 1 and 1.5 molecules for each formula unit.



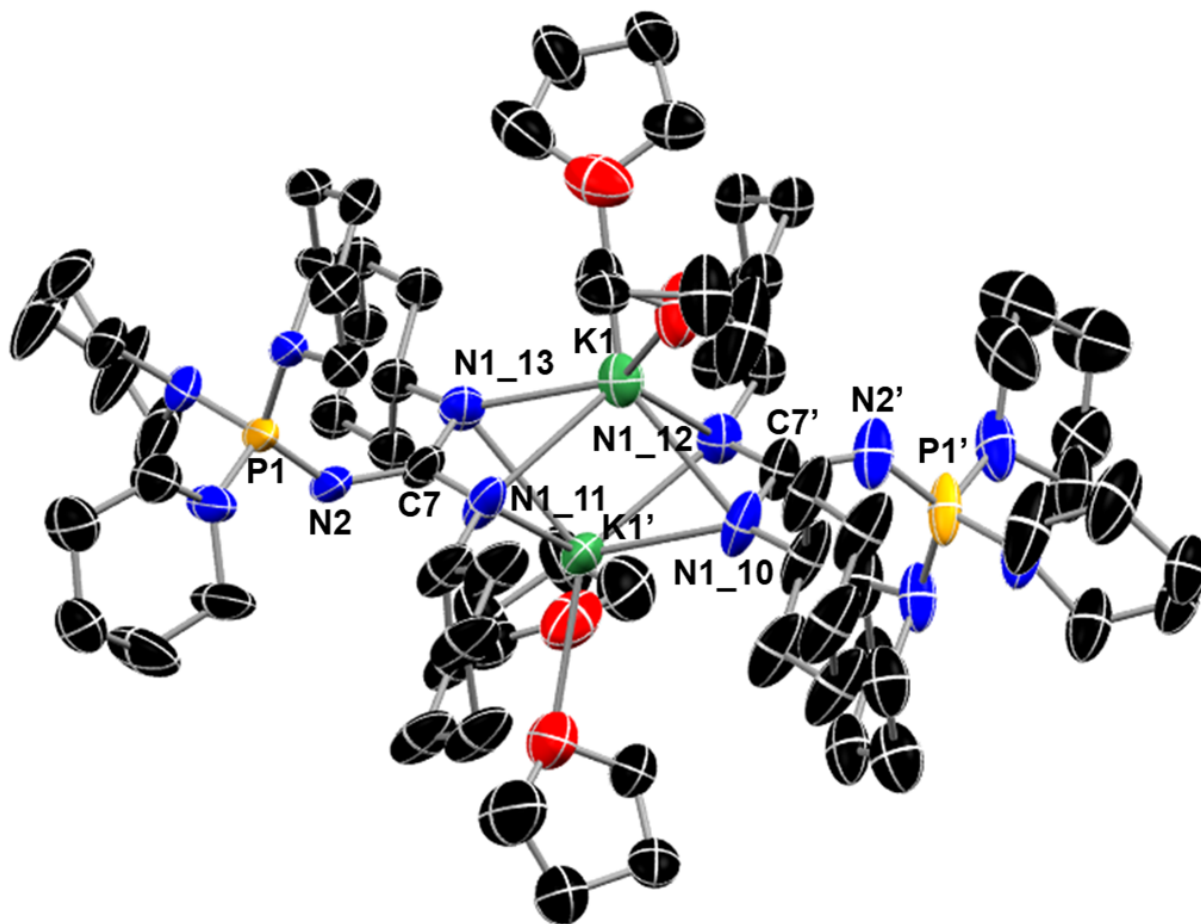

**Figure S24.** Molecular structure of **1-K** with thermal ellipsoids shown at 50% probability; H atoms are omitted for clarity.

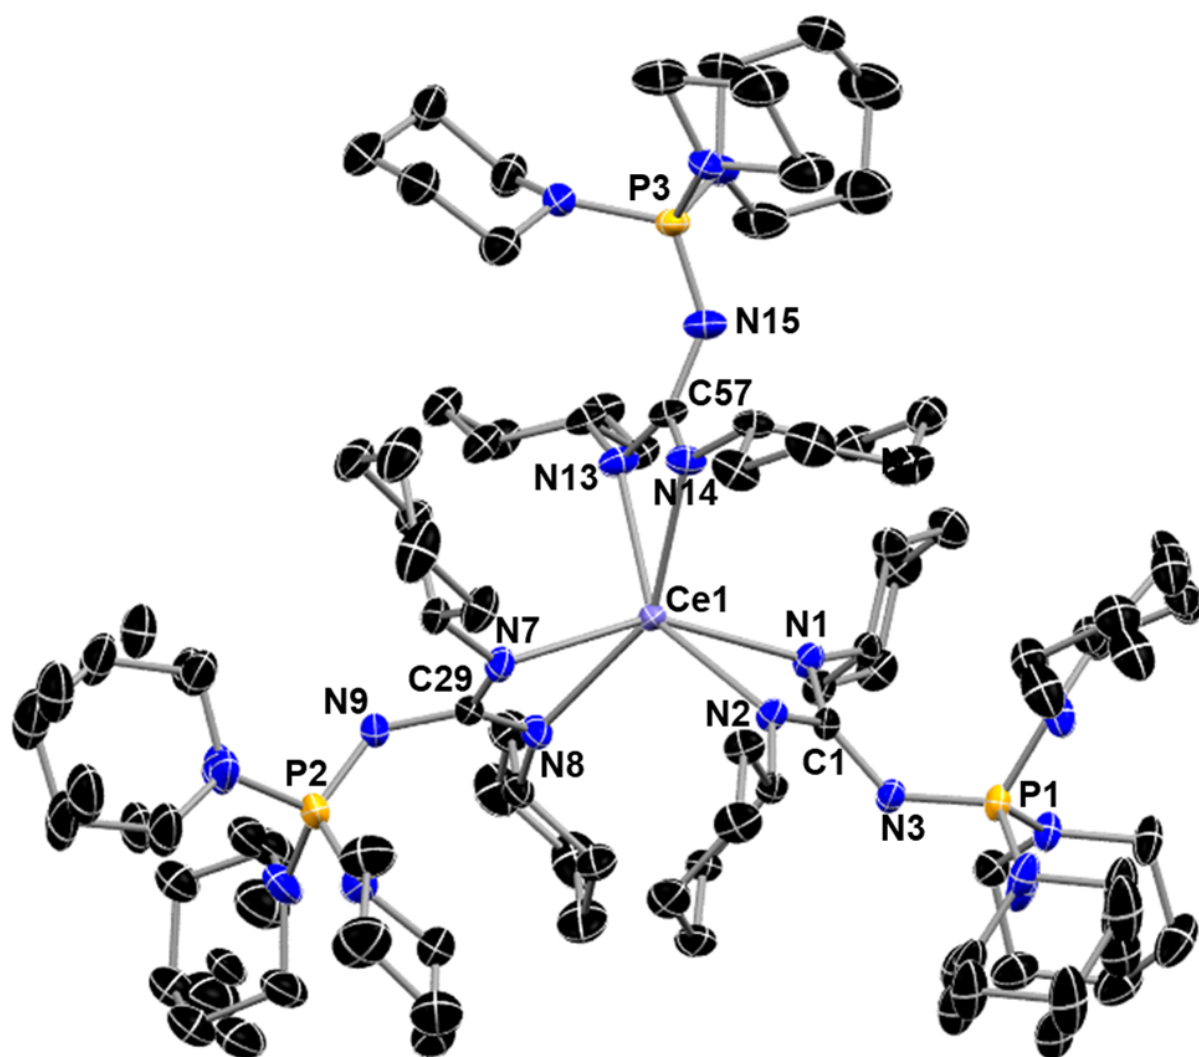

**Figure S25.** Molecular structure of **1-Ce** with thermal ellipsoids shown at 50% probability; H atoms are omitted for clarity.

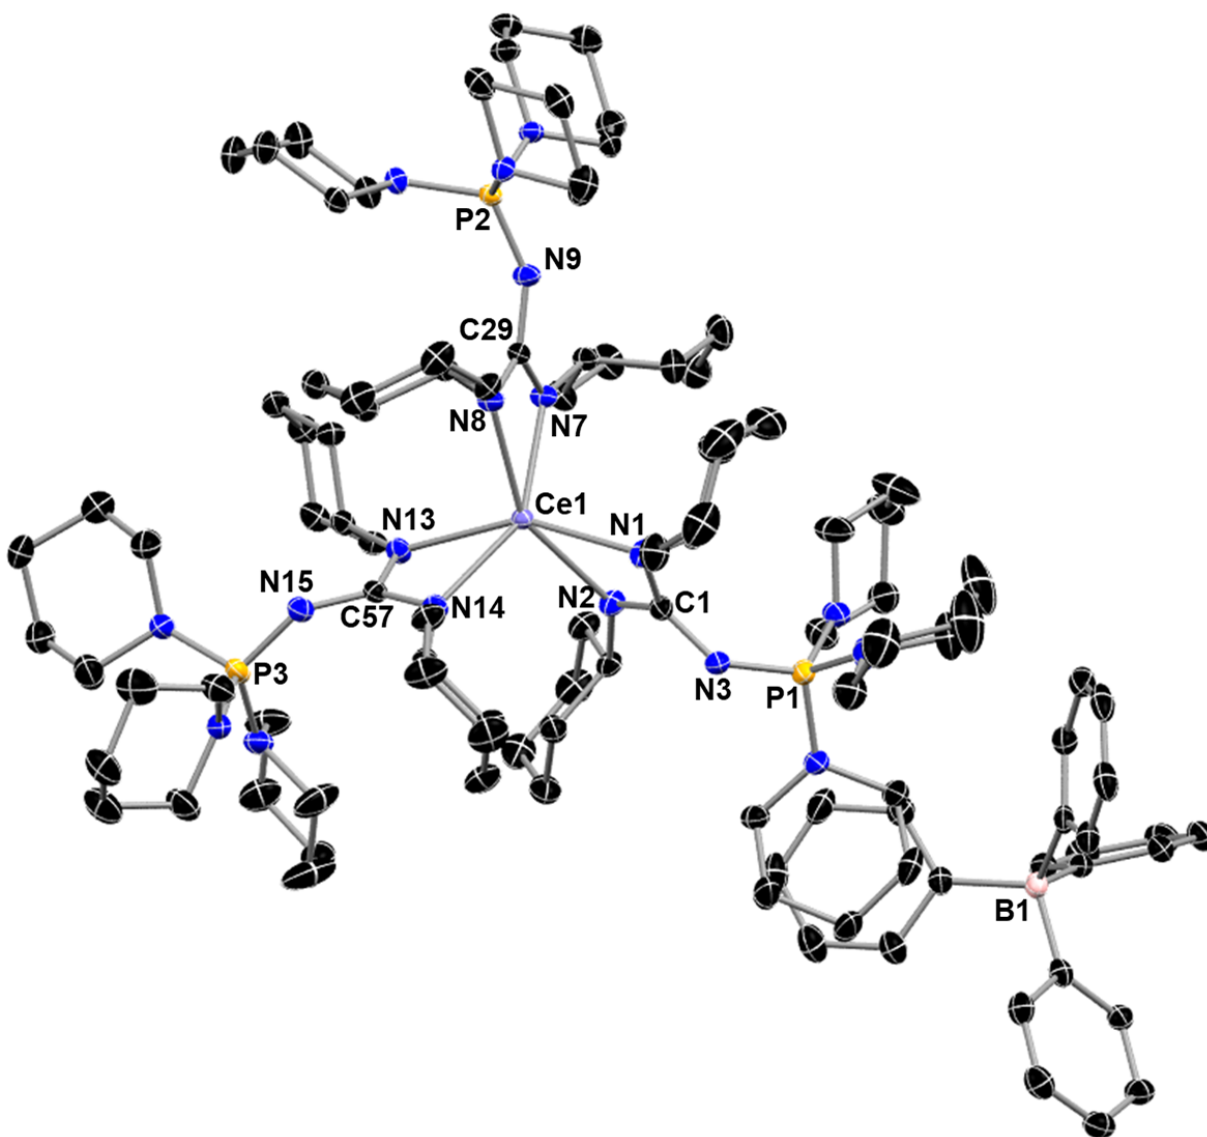

**Figure S26.** Molecular structure of **2-Ce** with thermal ellipsoids shown at 50% probability; H atoms are omitted for clarity.

**Table S3.** Crystallographic Data and Structure Refinement for **1-K**, **1-Ce**, and **2-Ce**

|                                                                      | <b>1-K</b>                                                                                    | <b>1-Ce</b>                                                            | <b>2-Ce</b>                                                            |
|----------------------------------------------------------------------|-----------------------------------------------------------------------------------------------|------------------------------------------------------------------------|------------------------------------------------------------------------|
| <b>Empirical Formula</b>                                             | C <sub>72</sub> H <sub>136</sub> K <sub>2</sub> N <sub>12</sub> O <sub>4</sub> P <sub>2</sub> | C <sub>89</sub> H <sub>168</sub> CeN <sub>18</sub> P <sub>3</sub>      | C <sub>123</sub> H <sub>214</sub> BCeN <sub>18</sub> P <sub>3</sub>    |
| <b>Formula Weight</b>                                                | 1347.06                                                                                       | 1723.43                                                                | 2188.95                                                                |
| <b>Temperature (K)</b>                                               | 100(2)                                                                                        | 100(1)                                                                 | 100.0(2)                                                               |
| <b>Crystal System</b>                                                | monoclinic                                                                                    | triclinic                                                              | triclinic                                                              |
| <b>Space Group</b>                                                   | C2/c                                                                                          | P- $\bar{1}$                                                           | P- $\bar{1}$                                                           |
| <b>a/Å</b>                                                           | 16.8786(16)                                                                                   | 16.104(2)                                                              | 13.438(2)                                                              |
| <b>b/Å</b>                                                           | 20.720(2)                                                                                     | 16.452(2)                                                              | 19.340(3)                                                              |
| <b>c/Å</b>                                                           | 22.088(2)                                                                                     | 20.980(3)                                                              | 22.773(4)                                                              |
| <b><math>\alpha</math>/°</b>                                         | 90                                                                                            | 81.638(5)                                                              | 95.893(7)                                                              |
| <b><math>\beta</math>/°</b>                                          | 92.938(4)                                                                                     | 88.524(6)                                                              | 99.060(7)                                                              |
| <b><math>\gamma</math>/°</b>                                         | 90                                                                                            | 61.054(4)                                                              | 91.156(7)                                                              |
| <b>Volume/Å<sup>3</sup></b>                                          | 7714.6(13)                                                                                    | 4806.0(11)                                                             | 5809.9(17)                                                             |
| <b>Z</b>                                                             | 4                                                                                             | 2                                                                      | 2                                                                      |
| <b>Z'</b>                                                            | 0.5                                                                                           | 1                                                                      | 1                                                                      |
| <b><math>\rho</math>(g/cm<sup>3</sup>)</b>                           | 1.183                                                                                         | 1.191                                                                  | 1.251                                                                  |
| <b><math>\mu</math>(mm<sup>-1</sup>)</b>                             | 0.218                                                                                         | 0.575                                                                  | 0.490                                                                  |
| <b>F(000)</b>                                                        | 3008.0                                                                                        | 1862.0                                                                 | 2372                                                                   |
| <b>Crystal Size/mm<sup>3</sup></b>                                   | 0.341 x 0.189 x<br>0.137                                                                      | 0.591 x 0.351 x<br>0.342                                               | 0.34 x 0.167 x<br>0.133                                                |
| <b>Radiation</b>                                                     | MoK $\alpha$ ( $\lambda$ =0.71073)                                                            | MoK $\alpha$ ( $\lambda$ =0.71073)                                     | MoK $\alpha$ ( $\lambda$ =0.71073)                                     |
| <b>2<math>\theta</math> range for data collection(°)</b>             | 4.34 to 49.43                                                                                 | 4.50 to 62.01                                                          | 4.41 to 57.42                                                          |
| <b>Index Ranges Reflections Collected</b>                            | -19 $\leq$ h $\leq$ 19, -24 $\leq$ k $\leq$ 24, -25 $\leq$ l $\leq$ 25                        | -22 $\leq$ h $\leq$ 23, -23 $\leq$ k $\leq$ 23, -30 $\leq$ l $\leq$ 28 | -18 $\leq$ h $\leq$ 18, -25 $\leq$ k $\leq$ 26, -30 $\leq$ l $\leq$ 29 |
| <b>Independent Reflections</b>                                       | 61569                                                                                         | 148026                                                                 | 120674                                                                 |
| <b>Data/Restraints/Parameters</b>                                    | 6615 [Rint = 0.1348, Rsigma = 0.0602]                                                         | 30201 [Rint = 0.0431, Rsigma = 0.0390]                                 | 29760 [Rint = 0.0534, Rsigma = 0.0524]                                 |
| <b>Goodness-of-Fit on F<sup>2</sup></b>                              | 6615/885/542                                                                                  | 30201/1264/1137                                                        | 29760/57/1205                                                          |
| <b>Final R Indexes [I <math>\geq</math> 2<math>\sigma</math>(I)]</b> | 2.808                                                                                         | 1.024                                                                  | 1.032                                                                  |
| <b>Final R Indexes [all data]</b>                                    | R1=0.1627, wR2=0.4009                                                                         | R1=0.0409, wR2=0.0958                                                  | R1=0.0437, wR2=0.1005                                                  |
| <b>Largest Diff. Peak/Hole/ (e Å<sup>3</sup>)</b>                    | R1=0.1964, wR2=0.4197                                                                         | R1=0.0523, wR2=0.1015                                                  | R1=0.0574, wR2=0.1066                                                  |
| <b>Flack Parameter Completeness to 2<math>\theta</math></b>          | 1.17/-0.64                                                                                    | 1.29/-0.72                                                             | 1.15/-0.74                                                             |
|                                                                      | -                                                                                             | -                                                                      | -                                                                      |
|                                                                      | 100                                                                                           | 100                                                                    | 100                                                                    |

| Table S4. Lengths for 1-KAtom |        |           | Length/Å |        |           |
|-------------------------------|--------|-----------|----------|--------|-----------|
| Atom                          | Atom   | Length/Å  | Atom     | Atom   | Length/Å  |
| K1                            | O1_5   | 2.814(14) | K1       | O1_5   | 2.814(14) |
|                               |        | )         |          |        | )         |
| K1                            | O1_6   | 2.999(14) | K1       | O1_6   | 2.999(14) |
|                               |        | )         |          |        | )         |
| K1                            | O1_8   | 2.811(15) | K1       | O1_8   | 2.811(15) |
|                               |        | )         |          |        | )         |
| K1                            | O1_9   | 2.998(15) | K1       | O1_9   | 2.998(15) |
|                               |        | )         |          |        | )         |
| K1                            | N1_10  | 2.855(10) | K1       | N1_10  | 2.855(10) |
|                               |        | )         |          |        | )         |
| K1                            | N1_11  | 2.900(10) | K1       | N1_11  | 2.900(10) |
|                               |        | )         |          |        | )         |
| K1                            | N1_12  | 2.854(10) | K1       | N1_12  | 2.854(10) |
|                               |        | )         |          |        | )         |
| K1                            | N1_13  | 2.895(10) | K1       | N1_13  | 2.895(10) |
|                               |        | )         |          |        | )         |
| K1                            | N1_10# | 2.765(10) | K1       | N1_10# | 2.765(10) |
|                               | 1      | )         |          | 1      | )         |
| K1                            | N1_11# | 2.745(12) | K1       | N1_11# | 2.745(12) |
|                               | 1      | )         |          | 1      | )         |
| K1                            | N1_12# | 2.882(11) | K1       | N1_12# | 2.882(11) |
|                               | 1      | )         |          | 1      | )         |
| K1                            | N1_13# | 2.711(9)  | K1       | N1_13# | 2.711(9)  |
|                               | 1      | )         |          | 1      | )         |
| P1                            | N2_3   | 1.659(10) | P1       | N2_3   | 1.659(10) |
|                               |        | )         |          |        | )         |
| P1                            | N2     | 1.550(7)  | P1       | N2     | 1.550(7)  |
| P1                            | N3_4   | 1.645(9)  | P1       | N3_4   | 1.645(9)  |
| P1                            | N4_7   | 1.669(10) | P1       | N4_7   | 1.669(10) |
|                               |        | )         |          |        | )         |
| O1_5                          | C1_5   | 1.40(2)   | O1_5     | C1_5   | 1.40(2)   |
| O1_5                          | C4_5   | 1.44(3)   | O1_5     | C4_5   | 1.44(3)   |
| O1_6                          | C1_6   | 1.40(2)   | O1_6     | C1_6   | 1.40(2)   |
| O1_6                          | C4_6   | 1.44(2)   | O1_6     | C4_6   | 1.44(2)   |
| O1_8                          | C1_8   | 1.40(3)   | O1_8     | C1_8   | 1.40(3)   |
| O1_8                          | C4_8   | 1.44(2)   | O1_8     | C4_8   | 1.44(2)   |
| O1_9                          | C1_9   | 1.40(2)   | O1_9     | C1_9   | 1.40(2)   |
| O1_9                          | C4_9   | 1.44(3)   | O1_9     | C4_9   | 1.44(3)   |
| N2_3                          | C2_3   | 1.416(18) | N2_3     | C2_3   | 1.416(18) |
|                               |        | )         |          |        | )         |
| N2_3                          | C6_3   | 1.478(13) | N2_3     | C6_3   | 1.478(13) |
|                               |        | )         |          |        | )         |
| N2                            | C7     | 1.411(13) | N2       | C7     | 1.411(13) |
|                               |        | )         |          |        | )         |

| Table S4. Lengths for 1-KAtom |       |           | Length/Å |       |           |
|-------------------------------|-------|-----------|----------|-------|-----------|
| Atom                          | Atom  | Length/Å  | Atom     | Atom  | Length/Å  |
| N3_4                          | C2_4  | 1.513(15) | N3_4     | C2_4  | 1.513(15) |
|                               |       | )         |          |       | )         |
| N3_4                          | C6_4  | 1.498(13) | N3_4     | C6_4  | 1.498(13) |
|                               |       | )         |          |       | )         |
| N4_7                          | C2_7  | 1.465(16) | N4_7     | C2_7  | 1.465(16) |
|                               |       | )         |          |       | )         |
| N4_7                          | C6_7  | 1.511(14) | N4_7     | C6_7  | 1.511(14) |
|                               |       | )         |          |       | )         |
| N1_10                         | C7    | 1.341(10) | N1_1     | C7    | 1.341(10) |
|                               |       | )         | 0        |       | )         |
| N1_10                         | C1_10 | 1.482(13) | N1_1     | C1_10 | 1.482(13) |
|                               |       | )         | 0        |       | )         |
| N1_11                         | C7    | 1.343(11) | N1_1     | C7    | 1.343(11) |
|                               |       | )         | 1        |       | )         |
| N1_11                         | C1_11 | 1.481(11) | N1_1     | C1_11 | 1.481(11) |
|                               |       | )         | 1        |       | )         |
| N1_12                         | C7    | 1.341(9)  | N1_1     | C7    | 1.341(9)  |
|                               |       | )         | 2        |       | )         |
| N1_12                         | C1_12 | 1.482(11) | N1_1     | C1_12 | 1.482(11) |
|                               |       | )         | 2        |       | )         |
| N1_13                         | C7    | 1.341(10) | N1_1     | C7    | 1.341(10) |
|                               |       | )         | 3        |       | )         |
| N1_13                         | C1_13 | 1.483(12) | N1_1     | C1_13 | 1.483(12) |
|                               |       | )         | 3        |       | )         |
| C1_3                          | C3_3  | 1.541(17) | C1_3     | C3_3  | 1.541(17) |
|                               |       | )         |          |       | )         |
| C1_3                          | C5_3  | 1.47(2)   | C1_3     | C5_3  | 1.47(2)   |
| C2_3                          | C3_3  | 1.42(3)   | C2_3     | C3_3  | 1.42(3)   |
| C5_3                          | C6_3  | 1.470(17) | C5_3     | C6_3  | 1.470(17) |
|                               |       | )         |          |       | )         |
| C1_4                          | C3_4  | 1.482(16) | C1_4     | C3_4  | 1.482(16) |
|                               |       | )         |          |       | )         |
| C1_4                          | C5_4  | 1.495(16) | C1_4     | C5_4  | 1.495(16) |
|                               |       | )         |          |       | )         |
| C2_4                          | C3_4  | 1.451(16) | C2_4     | C3_4  | 1.451(16) |
|                               |       | )         |          |       | )         |
| C5_4                          | C6_4  | 1.513(14) | C5_4     | C6_4  | 1.513(14) |
|                               |       | )         |          |       | )         |
| C1_5                          | C2_5  | 1.50(2)   | C1_5     | C2_5  | 1.50(2)   |
| C2_5                          | C3_5  | 1.53(3)   | C2_5     | C3_5  | 1.53(3)   |
| C3_5                          | C4_5  | 1.47(3)   | C3_5     | C4_5  | 1.47(3)   |
| C1_6                          | C2_6  | 1.50(2)   | C1_6     | C2_6  | 1.50(2)   |
| C2_6                          | C3_6  | 1.53(3)   | C2_6     | C3_6  | 1.53(3)   |

**Table S5.** Angles for 1-K

| Atom | Atom | Atom                | Angle/°  | Atom | Atom | Atom                | Angle/°  |
|------|------|---------------------|----------|------|------|---------------------|----------|
| O1_5 | K1   | O1_6                | 65.8(4)  | O1_5 | K1   | O1_6                | 65.8(4)  |
| O1_5 | K1   | O1_8                | 16.5(4)  | O1_5 | K1   | O1_8                | 16.5(4)  |
| O1_5 | K1   | O1_9                | 69.4(4)  | O1_5 | K1   | O1_9                | 69.4(4)  |
| O1_5 | K1   | N1_10               | 104.8(3) | O1_5 | K1   | N1_10               | 104.8(3) |
| O1_5 | K1   | N1_11               | 105.5(4) | O1_5 | K1   | N1_11               | 105.5(4) |
| O1_5 | K1   | N1_12               | 128.7(4) | O1_5 | K1   | N1_12               | 128.7(4) |
| O1_5 | K1   | N1_13               | 131.4(3) | O1_5 | K1   | N1_13               | 131.4(3) |
| O1_5 | K1   | C7                  | 109.6(3) | O1_5 | K1   | C7                  | 109.6(3) |
| O1_5 | K1   | N1_10 <sup>#1</sup> | 110.1(3) | O1_5 | K1   | N1_10 <sup>#1</sup> | 110.1(3) |
| O1_5 | K1   | N1_11 <sup>#1</sup> | 109.2(4) | O1_5 | K1   | N1_11 <sup>#1</sup> | 109.2(4) |
| O1_5 | K1   | N1_12 <sup>#1</sup> | 139.5(3) | O1_5 | K1   | N1_12 <sup>#1</sup> | 139.5(3) |
| O1_5 | K1   | N1_13 <sup>#1</sup> | 137.4(4) | O1_5 | K1   | N1_13 <sup>#1</sup> | 137.4(4) |
| O1_6 | K1   | O1_8                | 68.6(4)  | O1_6 | K1   | O1_8                | 68.6(4)  |
| O1_6 | K1   | O1_9                | 10.2(4)  | O1_6 | K1   | O1_9                | 10.2(4)  |
| O1_6 | K1   | N1_10               | 146.1(4) | O1_6 | K1   | N1_10               | 146.1(4) |
| O1_6 | K1   | N1_11               | 146.5(4) | O1_6 | K1   | N1_11               | 146.5(4) |
| O1_6 | K1   | N1_12               | 111.6(3) | O1_6 | K1   | N1_12               | 111.6(3) |
| O1_6 | K1   | N1_13               | 115.1(3) | O1_6 | K1   | N1_13               | 115.1(3) |
| O1_6 | K1   | N1_10 <sup>#1</sup> | 124.2(3) | O1_6 | K1   | N1_10 <sup>#1</sup> | 124.2(3) |
| O1_6 | K1   | N1_11 <sup>#1</sup> | 123.3(4) | O1_6 | K1   | N1_11 <sup>#1</sup> | 123.3(4) |
| O1_6 | K1   | N1_12 <sup>#1</sup> | 97.5(3)  | O1_6 | K1   | N1_12 <sup>#1</sup> | 97.5(3)  |
| O1_6 | K1   | N1_13 <sup>#1</sup> | 95.9(3)  | O1_6 | K1   | N1_13 <sup>#1</sup> | 95.9(3)  |
| O1_8 | K1   | O1_9                | 74.9(4)  | O1_8 | K1   | O1_9                | 74.9(4)  |
| O1_8 | K1   | N1_10               | 112.0(4) | O1_8 | K1   | N1_10               | 112.0(4) |
| O1_8 | K1   | N1_11               | 112.7(4) | O1_8 | K1   | N1_11               | 112.7(4) |
| O1_8 | K1   | N1_12               | 144.4(4) | O1_8 | K1   | N1_12               | 144.4(4) |
| O1_8 | K1   | N1_13               | 146.6(4) | O1_8 | K1   | N1_13               | 146.6(4) |
| O1_8 | K1   | N1_10 <sup>#1</sup> | 94.8(4)  | O1_8 | K1   | N1_10 <sup>#1</sup> | 94.8(4)  |
| O1_8 | K1   | N1_11 <sup>#1</sup> | 93.8(4)  | O1_8 | K1   | N1_11 <sup>#1</sup> | 93.8(4)  |
| O1_8 | K1   | N1_12 <sup>#1</sup> | 124.1(4) | O1_8 | K1   | N1_12 <sup>#1</sup> | 124.1(4) |
| O1_8 | K1   | N1_13 <sup>#1</sup> | 122.2(4) | O1_8 | K1   | N1_13 <sup>#1</sup> | 122.2(4) |
| O1_9 | K1   | N1_10               | 136.9(3) | O1_9 | K1   | N1_10               | 136.9(3) |
| O1_9 | K1   | N1_11               | 137.2(4) | O1_9 | K1   | N1_11               | 137.2(4) |
| O1_9 | K1   | N1_12               | 101.8(3) | O1_9 | K1   | N1_12               | 101.8(3) |
| O1_9 | K1   | N1_13               | 105.3(3) | O1_9 | K1   | N1_13               | 105.3(3) |
| O1_9 | K1   | N1_10 <sup>#1</sup> | 133.2(3) | O1_9 | K1   | N1_10 <sup>#1</sup> | 133.2(3) |
| O1_9 | K1   | N1_11 <sup>#1</sup> | 132.3(3) | O1_9 | K1   | N1_11 <sup>#1</sup> | 132.3(3) |
| O1_9 | K1   | N1_12 <sup>#1</sup> | 100.9(3) | O1_9 | K1   | N1_12 <sup>#1</sup> | 100.9(3) |

| Atom    | Atom | Atom    | Angle/°   |
|---------|------|---------|-----------|
| O1_9    | K1   | N1_13#1 | 99.5(3)   |
| N1_10   | K1   | N1_12   | 47.1(2)   |
| N1_10   | K1   | N1_13   | 45.2(2)   |
| N1_10   | K1   | N1_10#1 | 89.7(3)   |
| N1_10   | K1   | N1_11#1 | 90.6(3)   |
| N1_10   | K1   | N1_12#1 | 107.7(3)  |
| N1_10   | K1   | N1_13#1 | 109.8(3)  |
| N1_11   | K1   | N1_12   | 46.8(2)   |
| N1_11   | K1   | N1_13   | 44.8(2)   |
| N1_10#1 | K1   | N1_11   | 89.3(3)   |
| N1_11   | K1   | N1_11#1 | 90.2(3)   |
| N1_11   | K1   | N1_12#1 | 107.0(3)  |
| N1_11   | K1   | N1_13#1 | 109.1(3)  |
| N1_12   | K1   | N1_13   | 4.0(3)    |
| N1_10#1 | K1   | N1_12   | 111.0(3)  |
| N1_11#1 | K1   | N1_12   | 112.1(3)  |
| N1_12   | K1   | N1_12#1 | 91.4(3)   |
| N1_12   | K1   | N1_13#1 | 93.4(3)   |
| N1_10#1 | K1   | N1_13   | 107.1(3)  |
| N1_11#1 | K1   | N1_13   | 108.2(3)  |
| N1_12#1 | K1   | N1_13   | 89.0(3)   |
| N1_13   | K1   | N1_13#1 | 91.1(3)   |
| N1_10#1 | K1   | N1_11#1 | 1.2(3)    |
| N1_10#1 | K1   | N1_12#1 | 47.6(2)   |
| N1_10#1 | K1   | N1_13#1 | 47.6(2)   |
| N1_11#1 | K1   | N1_12#1 | 47.8(2)   |
| N1_11#1 | K1   | N1_13#1 | 47.8(2)   |
| N1_12#1 | K1   | N1_13#1 | 2.2(3)    |
| N2_3    | P1   | N2      | 110.1(5)  |
| N2_3    | P1   | N3_4    | 101.0(4)  |
| N2_3    | P1   | N4_7    | 109.4(5)  |
| N2      | P1   | N3_4    | 121.7(4)  |
| N2      | P1   | N4_7    | 111.6(5)  |
| N3_4    | P1   | N4_7    | 102.1(4)  |
| K1      | O1_5 | C1_5    | 102.5(10) |
| K1      | O1_5 | C4_5    | 139.8(11) |
| C1_5    | O1_5 | C4_5    | 108.0(13) |
| K1      | O1_6 | C1_6    | 119.3(11) |
| K1      | O1_6 | C4_6    | 125.0(10) |

| Atom    | Atom | Atom    | Angle/°   |
|---------|------|---------|-----------|
| O1_9    | K1   | N1_13#1 | 99.5(3)   |
| N1_10   | K1   | N1_12   | 47.1(2)   |
| N1_10   | K1   | N1_13   | 45.2(2)   |
| N1_10   | K1   | N1_10#1 | 89.7(3)   |
| N1_10   | K1   | N1_11#1 | 90.6(3)   |
| N1_10   | K1   | N1_12#1 | 107.7(3)  |
| N1_10   | K1   | N1_13#1 | 109.8(3)  |
| N1_11   | K1   | N1_12   | 46.8(2)   |
| N1_11   | K1   | N1_13   | 44.8(2)   |
| N1_10#1 | K1   | N1_11   | 89.3(3)   |
| N1_11   | K1   | N1_11#1 | 90.2(3)   |
| N1_11   | K1   | N1_12#1 | 107.0(3)  |
| N1_11   | K1   | N1_13#1 | 109.1(3)  |
| N1_12   | K1   | N1_13   | 4.0(3)    |
| N1_10#1 | K1   | N1_12   | 111.0(3)  |
| N1_11#1 | K1   | N1_12   | 112.1(3)  |
| N1_12   | K1   | N1_12#1 | 91.4(3)   |
| N1_12   | K1   | N1_13#1 | 93.4(3)   |
| N1_10#1 | K1   | N1_13   | 107.1(3)  |
| N1_11#1 | K1   | N1_13   | 108.2(3)  |
| N1_12#1 | K1   | N1_13   | 89.0(3)   |
| N1_13   | K1   | N1_13#1 | 91.1(3)   |
| N1_10#1 | K1   | N1_11#1 | 1.2(3)    |
| N1_10#1 | K1   | N1_12#1 | 47.6(2)   |
| N1_10#1 | K1   | N1_13#1 | 47.6(2)   |
| N1_11#1 | K1   | N1_12#1 | 47.8(2)   |
| N1_11#1 | K1   | N1_13#1 | 47.8(2)   |
| N1_12#1 | K1   | N1_13#1 | 2.2(3)    |
| N2_3    | P1   | N2      | 110.1(5)  |
| N2_3    | P1   | N3_4    | 101.0(4)  |
| N2_3    | P1   | N4_7    | 109.4(5)  |
| N2      | P1   | N3_4    | 121.7(4)  |
| N2      | P1   | N4_7    | 111.6(5)  |
| N3_4    | P1   | N4_7    | 102.1(4)  |
| K1      | O1_5 | C1_5    | 102.5(10) |
| K1      | O1_5 | C4_5    | 139.8(11) |
| C1_5    | O1_5 | C4_5    | 108.0(13) |
| K1      | O1_6 | C1_6    | 119.3(11) |
| K1      | O1_6 | C4_6    | 125.0(10) |



| Atom | Atom  | Atom | Angle/°   |
|------|-------|------|-----------|
| C1_6 | O1_6  | C4_6 | 107.7(13) |
| K1   | O1_8  | C1_8 | 134.9(10) |
| K1   | O1_8  | C4_8 | 112.6(13) |
| C1_8 | O1_8  | C4_8 | 107.9(14) |
| K1   | O1_9  | C1_9 | 99.0(11)  |
| K1   | O1_9  | C4_9 | 144.4(12) |
| C1_9 | O1_9  | C4_9 | 107.9(14) |
| P1   | N2_3  | C2_3 | 119.0(9)  |
| P1   | N2_3  | C6_3 | 118.7(8)  |
| C2_3 | N2_3  | C6_3 | 112.3(10) |
| P1   | N2    | C7   | 127.8(7)  |
| P1   | N3_4  | C2_4 | 119.6(7)  |
| P1   | N3_4  | C6_4 | 117.9(6)  |
| C2_4 | N3_4  | C6_4 | 109.3(8)  |
| P1   | N4_7  | C2_7 | 124.1(8)  |
| P1   | N4_7  | C6_7 | 127.3(7)  |
| C2_7 | N4_7  | C6_7 | 108.4(9)  |
| K1   | N1_10 | C7   | 87.0(5)   |

| Atom | Atom  | Atom | Angle/°   |
|------|-------|------|-----------|
| C1_6 | O1_6  | C4_6 | 107.7(13) |
| K1   | O1_8  | C1_8 | 134.9(10) |
| K1   | O1_8  | C4_8 | 112.6(13) |
| C1_8 | O1_8  | C4_8 | 107.9(14) |
| K1   | O1_9  | C1_9 | 99.0(11)  |
| K1   | O1_9  | C4_9 | 144.4(12) |
| C1_9 | O1_9  | C4_9 | 107.9(14) |
| P1   | N2_3  | C2_3 | 119.0(9)  |
| P1   | N2_3  | C6_3 | 118.7(8)  |
| C2_3 | N2_3  | C6_3 | 112.3(10) |
| P1   | N2    | C7   | 127.8(7)  |
| P1   | N3_4  | C2_4 | 119.6(7)  |
| P1   | N3_4  | C6_4 | 117.9(6)  |
| C2_4 | N3_4  | C6_4 | 109.3(8)  |
| P1   | N4_7  | C2_7 | 124.1(8)  |
| P1   | N4_7  | C6_7 | 127.3(7)  |
| C2_7 | N4_7  | C6_7 | 108.4(9)  |
| K1   | N1_10 | C7   | 87.0(5)   |

Symmetry transformations used to generate equivalent atoms:  
 #1: -X, +Y, 0.5-Z;

**Table S6.** Lengths for 1-Ce

| Atom | Atom  | Length/Å   |
|------|-------|------------|
| Ce1  | N1    | 2.4815(17) |
| Ce1  | N2    | 2.5007(18) |
| Ce1  | N7    | 2.5057(17) |
| Ce1  | N8    | 2.5019(19) |
| Ce1  | N13   | 2.508(2)   |
| Ce1  | N14   | 2.484(2)   |
| P1   | N5_1  | 1.6597(15) |
| P1   | N5_2  | 1.671(5)   |
| P1   | N3    | 1.5378(17) |
| P1   | N5    | 1.658(6)   |
| P1   | N5_3  | 1.656(7)   |
| P1   | N5_8  | 1.679(10)  |
| P2   | N9    | 1.540(2)   |
| P2   | N5_11 | 1.661(3)   |
| P2   | N5_13 | 1.663(2)   |
| P2   | N5_14 | 1.663(3)   |
| P2   | N5_9  | 1.682(5)   |
| P2   | N5_12 | 1.692(6)   |
| P3   | N5_4  | 1.6529(16) |

| Atom | Atom  | Length/Å   |
|------|-------|------------|
| Ce1  | N1    | 2.4815(17) |
| Ce1  | N2    | 2.5007(18) |
| Ce1  | N7    | 2.5057(17) |
| Ce1  | N8    | 2.5019(19) |
| Ce1  | N13   | 2.508(2)   |
| Ce1  | N14   | 2.484(2)   |
| P1   | N5_1  | 1.6597(15) |
| P1   | N5_2  | 1.671(5)   |
| P1   | N3    | 1.5378(17) |
| P1   | N5    | 1.658(6)   |
| P1   | N5_3  | 1.656(7)   |
| P1   | N5_8  | 1.679(10)  |
| P2   | N9    | 1.540(2)   |
| P2   | N5_11 | 1.661(3)   |
| P2   | N5_13 | 1.663(2)   |
| P2   | N5_14 | 1.663(3)   |
| P2   | N5_9  | 1.682(5)   |
| P2   | N5_12 | 1.692(6)   |
| P3   | N5_4  | 1.6529(16) |

| Atom  | Atom   | Length/Å   | Atom  | Atom   | Length/Å   |
|-------|--------|------------|-------|--------|------------|
| P3    | N5_7   | 1.6548(18) | P3    | N5_7   | 1.6548(18) |
| P3    | N5_10  | 1.6699(18) | P3    | N5_10  | 1.6699(18) |
| P3    | N15    | 1.535(2)   | P3    | N15    | 1.535(2)   |
| N1    | C1     | 1.344(3)   | N1    | C1     | 1.344(3)   |
| N1    | C2     | 1.449(2)   | N1    | C2     | 1.449(2)   |
| N5_1  | C19_1  | 1.464(2)   | N5_1  | C19_1  | 1.464(2)   |
| N5_1  | C23_1  | 1.463(2)   | N5_1  | C23_1  | 1.463(2)   |
| N2    | C1     | 1.343(2)   | N2    | C1     | 1.343(2)   |
| N2    | C8     | 1.450(3)   | N2    | C8     | 1.450(3)   |
| N5_2  | C19_2  | 1.463(7)   | N5_2  | C19_2  | 1.463(7)   |
| N5_2  | C23_2  | 1.466(6)   | N5_2  | C23_2  | 1.466(6)   |
| N3    | C1     | 1.388(3)   | N3    | C1     | 1.388(3)   |
| N5_3  | C23_3  | 1.467(9)   | N5_3  | C23_3  | 1.467(9)   |
| N5_3  | C19_3  | 1.464(9)   | N5_3  | C19_3  | 1.464(9)   |
| N5_4  | C23_4  | 1.461(3)   | N5_4  | C23_4  | 1.461(3)   |
| N5_4  | C19_4  | 1.466(2)   | N5_4  | C19_4  | 1.466(2)   |
| N5    | C23    | 1.495(9)   | N5    | C23    | 1.495(9)   |
| N5    | C19    | 1.462(10)  | N5    | C19    | 1.462(10)  |
| N5_7  | C19_7  | 1.465(3)   | N5_7  | C19_7  | 1.465(3)   |
| N5_7  | C23_7  | 1.464(3)   | N5_7  | C23_7  | 1.464(3)   |
| N5_8  | C19_8  | 1.466(14)  | N5_8  | C19_8  | 1.466(14)  |
| N5_8  | C23_8  | 1.468(12)  | N5_8  | C23_8  | 1.468(12)  |
| N7    | C30    | 1.454(3)   | N7    | C30    | 1.454(3)   |
| N7    | C29    | 1.343(3)   | N7    | C29    | 1.343(3)   |
| N5_9  | C19_9  | 1.467(9)   | N5_9  | C19_9  | 1.467(9)   |
| N5_9  | C23_9  | 1.467(9)   | N5_9  | C23_9  | 1.467(9)   |
| N8    | C29    | 1.337(3)   | N8    | C29    | 1.337(3)   |
| N8    | C36    | 1.450(3)   | N8    | C36    | 1.450(3)   |
| N5_10 | C19_10 | 1.465(2)   | N5_10 | C19_10 | 1.465(2)   |
| N5_10 | C23_10 | 1.468(3)   | N5_10 | C23_10 | 1.468(3)   |
| N9    | C29    | 1.396(2)   | N9    | C29    | 1.396(2)   |
| N5_11 | C19_11 | 1.467(5)   | N5_11 | C19_11 | 1.467(5)   |
| N5_11 | C23_11 | 1.467(4)   | N5_11 | C23_11 | 1.467(4)   |

**Table S7.** Angles for 1-Ce

| Atom | Atom | Atom | Angle/°   | Atom | Atom | Atom | Angle/°   |
|------|------|------|-----------|------|------|------|-----------|
| N1   | Ce1  | N2   | 53.65(5)  | N1   | Ce1  | N2   | 53.65(5)  |
| N1   | Ce1  | N7   | 149.58(7) | N1   | Ce1  | N7   | 149.58(7) |
| N1   | Ce1  | N8   | 107.59(6) | N1   | Ce1  | N8   | 107.59(6) |
| N1   | Ce1  | N13  | 104.09(6) | N1   | Ce1  | N13  | 104.09(6) |
| N1   | Ce1  | N14  | 100.66(6) | N1   | Ce1  | N14  | 100.66(6) |
| N2   | Ce1  | N7   | 104.44(6) | N2   | Ce1  | N7   | 104.44(6) |
| N2   | Ce1  | N8   | 104.73(6) | N2   | Ce1  | N8   | 104.73(6) |

| Atom  | Atom | Atom  | Angle/°    | Atom  | Atom | Atom  | Angle/°    |
|-------|------|-------|------------|-------|------|-------|------------|
| N2    | Ce1  | N13   | 145.50(6)  | N2    | Ce1  | N13   | 145.50(6)  |
| N2    | Ce1  | N14   | 100.85(6)  | N2    | Ce1  | N14   | 100.85(6)  |
| N7    | Ce1  | N8    | 53.23(6)   | N7    | Ce1  | N8    | 53.23(6)   |
| N7    | Ce1  | N13   | 104.48(6)  | N7    | Ce1  | N13   | 104.48(6)  |
| N7    | Ce1  | N14   | 104.59(6)  | N7    | Ce1  | N14   | 104.59(6)  |
| N8    | Ce1  | N13   | 107.51(6)  | N8    | Ce1  | N13   | 107.51(6)  |
| N8    | Ce1  | N14   | 149.62(6)  | N8    | Ce1  | N14   | 149.62(6)  |
| N13   | Ce1  | N14   | 53.52(6)   | N13   | Ce1  | N14   | 53.52(6)   |
| N5_1  | P1   | N5_2  | 113.18(17) | N5_1  | P1   | N5_2  | 113.18(17) |
| N5_1  | P1   | N3    | 109.89(8)  | N5_1  | P1   | N3    | 109.89(8)  |
| N5_1  | P1   | N5    | 102.5(2)   | N5_1  | P1   | N5    | 102.5(2)   |
| N5_1  | P1   | N5_3  | 106.5(3)   | N5_1  | P1   | N5_3  | 106.5(3)   |
| N5_1  | P1   | N5_8  | 107.2(3)   | N5_1  | P1   | N5_8  | 107.2(3)   |
| N5_2  | P1   | N3    | 110.50(17) | N5_2  | P1   | N3    | 110.50(17) |
| N3    | P1   | N5    | 118.2(2)   | N3    | P1   | N5    | 118.2(2)   |
| N3    | P1   | N5_3  | 122.5(3)   | N3    | P1   | N5_3  | 122.5(3)   |
| N3    | P1   | N5_8  | 109.2(3)   | N3    | P1   | N5_8  | 109.2(3)   |
| N9    | P2   | N5_11 | 112.04(15) | N9    | P2   | N5_11 | 112.04(15) |
| N9    | P2   | N5_13 | 119.91(10) | N9    | P2   | N5_13 | 119.91(10) |
| N9    | P2   | N5_14 | 107.95(14) | N9    | P2   | N5_14 | 107.95(14) |
| N5_9  | P2   | N9    | 111.6(2)   | N5_9  | P2   | N9    | 111.6(2)   |
| N9    | P2   | N5_12 | 111.8(3)   | N9    | P2   | N5_12 | 111.8(3)   |
| N5_11 | P2   | N5_13 | 101.88(14) | N5_11 | P2   | N5_13 | 101.88(14) |
| N5_13 | P2   | N5_14 | 108.16(15) | N5_13 | P2   | N5_14 | 108.16(15) |
| N5_9  | P2   | N5_13 | 97.9(2)    | N5_9  | P2   | N5_13 | 97.9(2)    |
| N5_12 | P2   | N5_13 | 100.7(3)   | N5_12 | P2   | N5_13 | 100.7(3)   |
| N5_4  | P3   | N5_7  | 107.22(9)  | N5_4  | P3   | N5_7  | 107.22(9)  |
| N5_4  | P3   | N5_10 | 100.92(8)  | N5_4  | P3   | N5_10 | 100.92(8)  |
| N5_4  | P3   | N15   | 119.20(10) | N5_4  | P3   | N15   | 119.20(10) |
| N5_7  | P3   | N5_10 | 107.94(9)  | N5_7  | P3   | N5_10 | 107.94(9)  |
| N5_7  | P3   | N15   | 107.56(10) | N5_7  | P3   | N15   | 107.56(10) |
| N5_10 | P3   | N15   | 113.37(9)  | N5_10 | P3   | N15   | 113.37(9)  |
| Ce1   | N1   | C1    | 95.16(11)  | Ce1   | N1   | C1    | 95.16(11)  |
| Ce1   | N1   | C2    | 141.47(13) | Ce1   | N1   | C2    | 141.47(13) |
| C1    | N1   | C2    | 122.28(17) | C1    | N1   | C2    | 122.28(17) |
| P1    | N5_1 | C19_1 | 121.27(11) | P1    | N5_1 | C19_1 | 121.27(11) |
| P1    | N5_1 | C23_1 | 125.12(13) | P1    | N5_1 | C23_1 | 125.12(13) |
| C19_1 | N5_1 | C23_1 | 112.69(15) | C19_1 | N5_1 | C23_1 | 112.69(15) |
| Ce1   | N2   | C1    | 94.32(11)  | Ce1   | N2   | C1    | 94.32(11)  |
| Ce1   | N2   | C8    | 136.55(12) | Ce1   | N2   | C8    | 136.55(12) |
| C1    | N2   | C8    | 119.43(18) | C1    | N2   | C8    | 119.43(18) |
| P1    | N5_2 | C19_2 | 119.7(3)   | P1    | N5_2 | C19_2 | 119.7(3)   |
| P1    | N5_2 | C23_2 | 120.3(4)   | P1    | N5_2 | C23_2 | 120.3(4)   |

| Atom   | Atom  | Atom   | Angle/°    |
|--------|-------|--------|------------|
| C19_2  | N5_2  | C23_2  | 112.7(5)   |
| P1     | N3    | C1     | 133.47(16) |
| P1     | N5_3  | C19_3  | 122.6(5)   |
| P1     | N5_3  | C23_3  | 117.0(5)   |
| C19_3  | N5_3  | C23_3  | 111.8(5)   |
| P3     | N5_4  | C19_4  | 122.67(13) |
| P3     | N5_4  | C23_4  | 118.06(14) |
| C19_4  | N5_4  | C23_4  | 112.69(15) |
| C19    | N5    | C23    | 111.6(5)   |
| P1     | N5    | C19    | 125.0(5)   |
| P1     | N5    | C23    | 117.9(5)   |
| P3     | N5_7  | C19_7  | 123.73(16) |
| P3     | N5_7  | C23_7  | 123.54(15) |
| C19_7  | N5_7  | C23_7  | 112.73(17) |
| C19_8  | N5_8  | C23_8  | 111.6(9)   |
| P1     | N5_8  | C19_8  | 118.0(6)   |
| P1     | N5_8  | C23_8  | 123.4(7)   |
| Ce1    | N7    | C29    | 94.68(11)  |
| C29    | N7    | C30    | 121.13(16) |
| Ce1    | N7    | C30    | 132.47(15) |
| P2     | N5_9  | C23_9  | 122.5(4)   |
| P2     | N5_9  | C19_9  | 125.8(5)   |
| C19_9  | N5_9  | C23_9  | 111.6(5)   |
| Ce1    | N8    | C29    | 95.00(13)  |
| C29    | N8    | C36    | 121.32(17) |
| Ce1    | N8    | C36    | 142.17(13) |
| P3     | N5_10 | C23_10 | 124.62(13) |
| C19_10 | N5_10 | C23_10 | 111.29(17) |
| P3     | N5_10 | C19_10 | 119.22(14) |
| P2     | N9    | C29    | 129.21(17) |
| C19_11 | N5_11 | C23_11 | 111.7(3)   |
| P2     | N5_11 | C19_11 | 120.6(2)   |
| P2     | N5_11 | C23_11 | 115.7(3)   |
| P2     | N5_12 | C23_12 | 129.3(4)   |
| P2     | N5_12 | C19_12 | 118.5(6)   |
| C19_12 | N5_12 | C23_12 | 111.2(5)   |
| C19_13 | N5_13 | C23_13 | 110.92(18) |
| P2     | N5_13 | C19_13 | 119.33(14) |
| P2     | N5_13 | C23_13 | 120.01(19) |
| P2     | N5_14 | C23_14 | 119.6(3)   |
| C19_14 | N5_14 | C23_14 | 112.2(3)   |
| P2     | N5_14 | C19_14 | 122.5(2)   |
| Ce1    | N13   | C57    | 94.29(13)  |

| Atom   | Atom  | Atom   | Angle/°    |
|--------|-------|--------|------------|
| C19_2  | N5_2  | C23_2  | 112.7(5)   |
| P1     | N3    | C1     | 133.47(16) |
| P1     | N5_3  | C19_3  | 122.6(5)   |
| P1     | N5_3  | C23_3  | 117.0(5)   |
| C19_3  | N5_3  | C23_3  | 111.8(5)   |
| P3     | N5_4  | C19_4  | 122.67(13) |
| P3     | N5_4  | C23_4  | 118.06(14) |
| C19_4  | N5_4  | C23_4  | 112.69(15) |
| C19    | N5    | C23    | 111.6(5)   |
| P1     | N5    | C19    | 125.0(5)   |
| P1     | N5    | C23    | 117.9(5)   |
| P3     | N5_7  | C19_7  | 123.73(16) |
| P3     | N5_7  | C23_7  | 123.54(15) |
| C19_7  | N5_7  | C23_7  | 112.73(17) |
| C19_8  | N5_8  | C23_8  | 111.6(9)   |
| P1     | N5_8  | C19_8  | 118.0(6)   |
| P1     | N5_8  | C23_8  | 123.4(7)   |
| Ce1    | N7    | C29    | 94.68(11)  |
| C29    | N7    | C30    | 121.13(16) |
| Ce1    | N7    | C30    | 132.47(15) |
| P2     | N5_9  | C23_9  | 122.5(4)   |
| P2     | N5_9  | C19_9  | 125.8(5)   |
| C19_9  | N5_9  | C23_9  | 111.6(5)   |
| Ce1    | N8    | C29    | 95.00(13)  |
| C29    | N8    | C36    | 121.32(17) |
| Ce1    | N8    | C36    | 142.17(13) |
| P3     | N5_10 | C23_10 | 124.62(13) |
| C19_10 | N5_10 | C23_10 | 111.29(17) |
| P3     | N5_10 | C19_10 | 119.22(14) |
| P2     | N9    | C29    | 129.21(17) |
| C19_11 | N5_11 | C23_11 | 111.7(3)   |
| P2     | N5_11 | C19_11 | 120.6(2)   |
| P2     | N5_11 | C23_11 | 115.7(3)   |
| P2     | N5_12 | C23_12 | 129.3(4)   |
| P2     | N5_12 | C19_12 | 118.5(6)   |
| C19_12 | N5_12 | C23_12 | 111.2(5)   |
| C19_13 | N5_13 | C23_13 | 110.92(18) |
| P2     | N5_13 | C19_13 | 119.33(14) |
| P2     | N5_13 | C23_13 | 120.01(19) |
| P2     | N5_14 | C23_14 | 119.6(3)   |
| C19_14 | N5_14 | C23_14 | 112.2(3)   |
| P2     | N5_14 | C19_14 | 122.5(2)   |
| Ce1    | N13   | C57    | 94.29(13)  |

| Atom  | Atom  | Atom  | Angle/°    |
|-------|-------|-------|------------|
| Ce1   | N13   | C58   | 142.22(15) |
| C57   | N13   | C58   | 121.7(2)   |
| Ce1   | N14   | C64   | 134.97(14) |
| C57   | N14   | C64   | 119.54(19) |
| Ce1   | N14   | C57   | 95.38(13)  |
| P3    | N15   | C57   | 138.59(17) |
| N1    | C1    | N2    | 113.62(18) |
| N1    | C1    | N3    | 124.16(16) |
| N2    | C1    | N3    | 122.05(18) |
| N5_1  | C19_1 | C20_1 | 110.18(16) |
| C3    | C2    | C7    | 109.39(17) |
| N1    | C2    | C7    | 108.91(17) |
| N1    | C2    | C3    | 111.83(16) |
| C19_1 | C20_1 | C21_1 | 110.39(19) |
| C2    | C3    | C4    | 112.38(17) |
| C20_1 | C21_1 | C22_1 | 110.24(19) |
| C3    | C4    | C5    | 110.9(2)   |
| C21_1 | C22_1 | C23_1 | 111.4(2)   |
| C4    | C5    | C6    | 110.8(2)   |
| N5_1  | C23_1 | C22_1 | 112.04(18) |
| C5    | C6    | C7    | 111.1(2)   |
| N5_2  | C19_2 | C20_2 | 109.9(4)   |
| C2    | C7    | C6    | 112.26(19) |
| C19_2 | C20_2 | C21_2 | 110.8(4)   |

| Atom  | Atom  | Atom  | Angle/°    |
|-------|-------|-------|------------|
| Ce1   | N13   | C58   | 142.22(15) |
| C57   | N13   | C58   | 121.7(2)   |
| Ce1   | N14   | C64   | 134.97(14) |
| C57   | N14   | C64   | 119.54(19) |
| Ce1   | N14   | C57   | 95.38(13)  |
| P3    | N15   | C57   | 138.59(17) |
| N1    | C1    | N2    | 113.62(18) |
| N1    | C1    | N3    | 124.16(16) |
| N2    | C1    | N3    | 122.05(18) |
| N5_1  | C19_1 | C20_1 | 110.18(16) |
| C3    | C2    | C7    | 109.39(17) |
| N1    | C2    | C7    | 108.91(17) |
| N1    | C2    | C3    | 111.83(16) |
| C19_1 | C20_1 | C21_1 | 110.39(19) |
| C2    | C3    | C4    | 112.38(17) |
| C20_1 | C21_1 | C22_1 | 110.24(19) |
| C3    | C4    | C5    | 110.9(2)   |
| C21_1 | C22_1 | C23_1 | 111.4(2)   |
| C4    | C5    | C6    | 110.8(2)   |
| N5_1  | C23_1 | C22_1 | 112.04(18) |
| C5    | C6    | C7    | 111.1(2)   |
| N5_2  | C19_2 | C20_2 | 109.9(4)   |
| C2    | C7    | C6    | 112.26(19) |
| C19_2 | C20_2 | C21_2 | 110.8(4)   |

**Table S8.** Lengths for **2-Ce**

| <b>Atom</b> | <b>Atom</b> | <b>Length/Å</b> | <b>Atom</b> | <b>Atom</b> | <b>Length/Å</b> |
|-------------|-------------|-----------------|-------------|-------------|-----------------|
| Ce1         | N1          | 2.336(2)        | Ce1         | N1          | 2.336(2)        |
| Ce1         | N2          | 2.3592(18)      | Ce1         | N2          | 2.3592(18)      |
| Ce1         | N7          | 2.3443(19)      | Ce1         | N7          | 2.3443(19)      |
| Ce1         | N8          | 2.359(2)        | Ce1         | N8          | 2.359(2)        |
| Ce1         | N13         | 2.3664(19)      | Ce1         | N13         | 2.3664(19)      |
| Ce1         | N14         | 2.3668(19)      | Ce1         | N14         | 2.3668(19)      |
| Ce1         | C1          | 2.830(2)        | Ce1         | C1          | 2.830(2)        |
| Ce1         | C29         | 2.839(2)        | Ce1         | C29         | 2.839(2)        |
| Ce1         | C57         | 2.825(2)        | Ce1         | C57         | 2.825(2)        |
| P1          | N3          | 1.555(2)        | P1          | N3          | 1.555(2)        |
| P1          | N4          | 1.655(2)        | P1          | N4          | 1.655(2)        |
| P1          | N5          | 1.663(2)        | P1          | N5          | 1.663(2)        |
| P1          | N6          | 1.634(2)        | P1          | N6          | 1.634(2)        |
| P2          | N9          | 1.543(2)        | P2          | N9          | 1.543(2)        |
| P2          | N10         | 1.6498(19)      | P2          | N10         | 1.6498(19)      |
| P2          | N11         | 1.6753(19)      | P2          | N11         | 1.6753(19)      |
| P2          | N12         | 1.6533(19)      | P2          | N12         | 1.6533(19)      |
| P3          | N15         | 1.545(2)        | P3          | N15         | 1.545(2)        |
| P3          | N16         | 1.658(2)        | P3          | N16         | 1.658(2)        |
| P3          | N17         | 1.656(2)        | P3          | N17         | 1.656(2)        |
| P3          | N18A        | 1.667(3)        | P3          | N18A        | 1.667(3)        |
| P3          | N18B        | 1.675(3)        | P3          | N18B        | 1.675(3)        |
| N1          | C1          | 1.353(3)        | N1          | C1          | 1.353(3)        |
| N1          | C2          | 1.458(3)        | N1          | C2          | 1.458(3)        |
| N2          | C1          | 1.349(3)        | N2          | C1          | 1.349(3)        |
| N2          | C8          | 1.466(3)        | N2          | C8          | 1.466(3)        |
| N3          | C1          | 1.352(3)        | N3          | C1          | 1.352(3)        |
| N4          | C14         | 1.465(3)        | N4          | C14         | 1.465(3)        |
| N4          | C18         | 1.465(3)        | N4          | C18         | 1.465(3)        |
| N5          | C19         | 1.469(4)        | N5          | C19         | 1.469(4)        |
| N5          | C23         | 1.481(4)        | N5          | C23         | 1.481(4)        |
| N6          | C24         | 1.481(3)        | N6          | C24         | 1.481(3)        |
| N6          | C28         | 1.452(3)        | N6          | C28         | 1.452(3)        |
| N7          | C29         | 1.364(3)        | N7          | C29         | 1.364(3)        |
| N7          | C30         | 1.458(3)        | N7          | C30         | 1.458(3)        |
| N8          | C29         | 1.355(3)        | N8          | C29         | 1.355(3)        |
| N8          | C36         | 1.457(3)        | N8          | C36         | 1.457(3)        |
| N9          | C29         | 1.342(3)        | N9          | C29         | 1.342(3)        |

| Atom | Atom | Length/Å |
|------|------|----------|
| N10  | C42  | 1.473(3) |
| N10  | C46  | 1.476(3) |
| N11  | C47  | 1.479(3) |
| N11  | C51  | 1.480(3) |
| N12  | C52  | 1.469(3) |
| N12  | C56  | 1.475(3) |
| N13  | C57  | 1.349(3) |
| N13  | C58  | 1.462(3) |
| N14  | C57  | 1.357(3) |
| N14  | C64  | 1.463(3) |
| N15  | C57  | 1.351(3) |
| N16  | C70  | 1.473(4) |
| N16  | C74  | 1.494(4) |
| N17  | C75  | 1.471(4) |
| N17  | C79  | 1.468(3) |
| N18A | C80A | 1.461(6) |
| N18A | C84A | 1.479(6) |
| N18B | C84B | 1.484(6) |
| N18B | C80B | 1.464(6) |
| C2   | C3   | 1.521(4) |
| C2   | C7   | 1.532(4) |
| C3   | C4   | 1.536(4) |
| C4   | C5   | 1.508(5) |
| C5   | C6   | 1.510(5) |
| C6   | C7   | 1.529(4) |
| C8   | C9   | 1.532(3) |
| C8   | C13  | 1.522(3) |
| C9   | C10  | 1.529(4) |
| C10  | C11  | 1.522(4) |
| C11  | C12  | 1.511(4) |
| C12  | C13  | 1.533(3) |
| C14  | C15  | 1.531(4) |
| C15  | C16  | 1.518(4) |
| C16  | C17  | 1.526(4) |
| C17  | C18  | 1.517(4) |
| C19  | C20  | 1.499(4) |
| C20  | C21  | 1.537(6) |
| C21  | C22  | 1.518(6) |
| C22  | C23  | 1.500(6) |

| Atom | Atom | Length/Å |
|------|------|----------|
| N10  | C42  | 1.473(3) |
| N10  | C46  | 1.476(3) |
| N11  | C47  | 1.479(3) |
| N11  | C51  | 1.480(3) |
| N12  | C52  | 1.469(3) |
| N12  | C56  | 1.475(3) |
| N13  | C57  | 1.349(3) |
| N13  | C58  | 1.462(3) |
| N14  | C57  | 1.357(3) |
| N14  | C64  | 1.463(3) |
| N15  | C57  | 1.351(3) |
| N16  | C70  | 1.473(4) |
| N16  | C74  | 1.494(4) |
| N17  | C75  | 1.471(4) |
| N17  | C79  | 1.468(3) |
| N18A | C80A | 1.461(6) |
| N18A | C84A | 1.479(6) |
| N18B | C84B | 1.484(6) |
| N18B | C80B | 1.464(6) |
| C2   | C3   | 1.521(4) |
| C2   | C7   | 1.532(4) |
| C3   | C4   | 1.536(4) |
| C4   | C5   | 1.508(5) |
| C5   | C6   | 1.510(5) |
| C6   | C7   | 1.529(4) |
| C8   | C9   | 1.532(3) |
| C8   | C13  | 1.522(3) |
| C9   | C10  | 1.529(4) |
| C10  | C11  | 1.522(4) |
| C11  | C12  | 1.511(4) |
| C12  | C13  | 1.533(3) |
| C14  | C15  | 1.531(4) |
| C15  | C16  | 1.518(4) |
| C16  | C17  | 1.526(4) |
| C17  | C18  | 1.517(4) |
| C19  | C20  | 1.499(4) |
| C20  | C21  | 1.537(6) |
| C21  | C22  | 1.518(6) |
| C22  | C23  | 1.500(6) |

| Atom | Atom | Length/Å |
|------|------|----------|
| C24  | C25  | 1.503(4) |
| C25  | C26  | 1.514(4) |

| Atom | Atom | Length/Å |
|------|------|----------|
| C24  | C25  | 1.503(4) |
| C25  | C26  | 1.514(4) |

**Table S9.** Angles for 2-Ce

| Atom | Atom | Atom | Angle/°    |
|------|------|------|------------|
| N1   | Ce1  | N2   | 56.27(6)   |
| N1   | Ce1  | N7   | 104.73(7)  |
| N1   | Ce1  | N8   | 104.01(7)  |
| N1   | Ce1  | N13  | 151.73(7)  |
| N1   | Ce1  | N14  | 102.66(7)  |
| N1   | Ce1  | C1   | 28.36(6)   |
| N1   | Ce1  | C29  | 105.16(7)  |
| N1   | Ce1  | C57  | 130.40(7)  |
| N2   | Ce1  | N7   | 105.06(7)  |
| N2   | Ce1  | N8   | 151.52(7)  |
| N2   | Ce1  | N13  | 106.15(6)  |
| N2   | Ce1  | N14  | 102.49(7)  |
| N2   | Ce1  | C1   | 28.32(6)   |
| N2   | Ce1  | C29  | 129.77(7)  |
| N2   | Ce1  | C57  | 110.23(7)  |
| N7   | Ce1  | N8   | 56.82(6)   |
| N7   | Ce1  | N13  | 101.25(7)  |
| N7   | Ce1  | N14  | 148.76(7)  |
| N7   | Ce1  | C1   | 110.49(7)  |
| N7   | Ce1  | C29  | 28.53(6)   |
| N7   | Ce1  | C57  | 124.47(7)  |
| N8   | Ce1  | N13  | 99.41(7)   |
| N8   | Ce1  | N14  | 101.99(6)  |
| N8   | Ce1  | C1   | 131.13(7)  |
| N8   | Ce1  | C29  | 28.34(6)   |
| N8   | Ce1  | C57  | 98.22(6)   |
| N13  | Ce1  | N14  | 56.50(6)   |
| N13  | Ce1  | C1   | 129.11(6)  |
| N13  | Ce1  | C29  | 102.99(6)  |
| N13  | Ce1  | C57  | 28.40(6)   |
| N14  | Ce1  | C1   | 100.75(6)  |
| N14  | Ce1  | C29  | 127.72(6)  |
| N14  | Ce1  | C57  | 28.60(6)   |
| C1   | Ce1  | C29  | 123.86(6)  |
| C1   | Ce1  | C57  | 121.02(6)  |
| C29  | Ce1  | C57  | 114.80(6)  |
| N3   | P1   | N4   | 117.28(10) |
| N3   | P1   | N5   | 112.30(11) |

| Atom | Atom | Atom | Angle/°    |
|------|------|------|------------|
| N1   | Ce1  | N2   | 56.27(6)   |
| N1   | Ce1  | N7   | 104.73(7)  |
| N1   | Ce1  | N8   | 104.01(7)  |
| N1   | Ce1  | N13  | 151.73(7)  |
| N1   | Ce1  | N14  | 102.66(7)  |
| N1   | Ce1  | C1   | 28.36(6)   |
| N1   | Ce1  | C29  | 105.16(7)  |
| N1   | Ce1  | C57  | 130.40(7)  |
| N2   | Ce1  | N7   | 105.06(7)  |
| N2   | Ce1  | N8   | 151.52(7)  |
| N2   | Ce1  | N13  | 106.15(6)  |
| N2   | Ce1  | N14  | 102.49(7)  |
| N2   | Ce1  | C1   | 28.32(6)   |
| N2   | Ce1  | C29  | 129.77(7)  |
| N2   | Ce1  | C57  | 110.23(7)  |
| N7   | Ce1  | N8   | 56.82(6)   |
| N7   | Ce1  | N13  | 101.25(7)  |
| N7   | Ce1  | N14  | 148.76(7)  |
| N7   | Ce1  | C1   | 110.49(7)  |
| N7   | Ce1  | C29  | 28.53(6)   |
| N7   | Ce1  | C57  | 124.47(7)  |
| N8   | Ce1  | N13  | 99.41(7)   |
| N8   | Ce1  | N14  | 101.99(6)  |
| N8   | Ce1  | C1   | 131.13(7)  |
| N8   | Ce1  | C29  | 28.34(6)   |
| N8   | Ce1  | C57  | 98.22(6)   |
| N13  | Ce1  | N14  | 56.50(6)   |
| N13  | Ce1  | C1   | 129.11(6)  |
| N13  | Ce1  | C29  | 102.99(6)  |
| N13  | Ce1  | C57  | 28.40(6)   |
| N14  | Ce1  | C1   | 100.75(6)  |
| N14  | Ce1  | C29  | 127.72(6)  |
| N14  | Ce1  | C57  | 28.60(6)   |
| C1   | Ce1  | C29  | 123.86(6)  |
| C1   | Ce1  | C57  | 121.02(6)  |
| C29  | Ce1  | C57  | 114.80(6)  |
| N3   | P1   | N4   | 117.28(10) |
| N3   | P1   | N5   | 112.30(11) |



| Atom | Atom | Atom | Angle/°    | Atom | Atom | Atom | Angle/°    |
|------|------|------|------------|------|------|------|------------|
| N3   | P1   | N6   | 108.04(11) | N3   | P1   | N6   | 108.04(11) |
| N4   | P1   | N5   | 101.87(11) | N4   | P1   | N5   | 101.87(11) |
| N4   | P1   | N6   | 108.16(11) | N4   | P1   | N6   | 108.16(11) |
| N5   | P1   | N6   | 108.85(11) | N5   | P1   | N6   | 108.85(11) |
| N9   | P2   | N10  | 119.60(10) | N9   | P2   | N10  | 119.60(10) |
| N9   | P2   | N11  | 111.70(10) | N9   | P2   | N11  | 111.70(10) |
| N9   | P2   | N12  | 106.62(10) | N9   | P2   | N12  | 106.62(10) |
| N10  | P2   | N11  | 104.08(9)  | N10  | P2   | N11  | 104.08(9)  |
| N10  | P2   | N12  | 102.74(9)  | N10  | P2   | N12  | 102.74(9)  |
| N11  | P2   | N12  | 111.85(9)  | N11  | P2   | N12  | 111.85(9)  |
| N15  | P3   | N16  | 108.88(11) | N15  | P3   | N16  | 108.88(11) |
| N15  | P3   | N17  | 119.56(11) | N15  | P3   | N17  | 119.56(11) |
| N15  | P3   | N18A | 110.39(15) | N15  | P3   | N18A | 110.39(15) |
| N15  | P3   | N18B | 109.57(16) | N15  | P3   | N18B | 109.57(16) |
| N16  | P3   | N17  | 103.96(11) | N16  | P3   | N17  | 103.96(11) |
| N16  | P3   | N18A | 116.58(15) | N16  | P3   | N18A | 116.58(15) |
| N16  | P3   | N18B | 106.5(2)   | N16  | P3   | N18B | 106.5(2)   |
| N17  | P3   | N18A | 97.43(16)  | N17  | P3   | N18A | 97.43(16)  |
| N17  | P3   | N18B | 107.56(17) | N17  | P3   | N18B | 107.56(17) |
| Ce1  | N1   | C1   | 96.54(13)  | Ce1  | N1   | C1   | 96.54(13)  |
| Ce1  | N1   | C2   | 141.68(14) | Ce1  | N1   | C2   | 141.68(14) |
| C1   | N1   | C2   | 121.77(19) | C1   | N1   | C2   | 121.77(19) |
| Ce1  | N2   | C1   | 95.61(13)  | Ce1  | N2   | C1   | 95.61(13)  |
| Ce1  | N2   | C8   | 136.61(14) | Ce1  | N2   | C8   | 136.61(14) |
| C1   | N2   | C8   | 121.53(18) | C1   | N2   | C8   | 121.53(18) |
| P1   | N3   | C1   | 136.09(18) | P1   | N3   | C1   | 136.09(18) |
| P1   | N4   | C14  | 118.77(17) | P1   | N4   | C14  | 118.77(17) |
| P1   | N4   | C18  | 119.37(17) | P1   | N4   | C18  | 119.37(17) |
| C14  | N4   | C18  | 111.9(2)   | C14  | N4   | C18  | 111.9(2)   |
| P1   | N5   | C19  | 117.33(18) | P1   | N5   | C19  | 117.33(18) |
| P1   | N5   | C23  | 123.3(2)   | P1   | N5   | C23  | 123.3(2)   |
| C19  | N5   | C23  | 112.6(2)   | C19  | N5   | C23  | 112.6(2)   |
| P1   | N6   | C24  | 120.93(17) | P1   | N6   | C24  | 120.93(17) |
| P1   | N6   | C28  | 125.90(16) | P1   | N6   | C28  | 125.90(16) |
| C24  | N6   | C28  | 112.9(2)   | C24  | N6   | C28  | 112.9(2)   |
| Ce1  | N7   | C29  | 96.32(12)  | Ce1  | N7   | C29  | 96.32(12)  |
| Ce1  | N7   | C30  | 141.90(14) | Ce1  | N7   | C30  | 141.90(14) |
| C29  | N7   | C30  | 120.07(17) | C29  | N7   | C30  | 120.07(17) |
| Ce1  | N8   | C29  | 95.91(13)  | Ce1  | N8   | C29  | 95.91(13)  |
| Ce1  | N8   | C36  | 140.82(13) | Ce1  | N8   | C36  | 140.82(13) |
| C29  | N8   | C36  | 122.35(18) | C29  | N8   | C36  | 122.35(18) |
| P2   | N9   | C29  | 148.54(17) | P2   | N9   | C29  | 148.54(17) |
| P2   | N10  | C42  | 123.08(14) | P2   | N10  | C42  | 123.08(14) |

| Atom | Atom | Atom | Angle/°    |
|------|------|------|------------|
| P2   | N10  | C46  | 117.13(15) |
| C42  | N10  | C46  | 111.26(17) |
| P2   | N11  | C47  | 114.02(14) |
| P2   | N11  | C51  | 117.70(14) |
| C47  | N11  | C51  | 111.12(17) |
| P2   | N12  | C52  | 122.23(14) |
| P2   | N12  | C56  | 123.04(15) |
| C52  | N12  | C56  | 112.27(17) |
| Ce1  | N13  | C57  | 95.05(13)  |
| Ce1  | N13  | C58  | 139.68(14) |
| C57  | N13  | C58  | 121.73(18) |
| Ce1  | N14  | C57  | 94.80(13)  |
| Ce1  | N14  | C64  | 144.44(14) |
| C57  | N14  | C64  | 120.61(18) |
| P3   | N15  | C57  | 140.28(17) |
| P3   | N16  | C70  | 119.75(17) |
| P3   | N16  | C74  | 117.90(17) |
| C70  | N16  | C74  | 111.9(2)   |
| P3   | N17  | C75  | 117.79(17) |
| P3   | N17  | C79  | 118.17(17) |
| C75  | N17  | C79  | 111.2(2)   |
| P3   | N18A | C80A | 117.5(3)   |
| P3   | N18A | C84A | 126.8(3)   |
| C80A | N18A | C84A | 113.8(3)   |
| P3   | N18B | C84B | 122.4(3)   |
| C80B | N18B | C84B | 111.9(4)   |
| P3   | N18B | C80B | 121.0(3)   |
| Ce1  | C1   | N1   | 55.10(11)  |
| Ce1  | C1   | N2   | 56.07(11)  |
| N2   | C1   | N3   | 125.0(2)   |
| N1   | C1   | N3   | 124.8(2)   |
| Ce1  | C1   | N3   | 166.61(16) |
| N1   | C1   | N2   | 110.06(19) |
| N1   | C2   | C7   | 108.6(2)   |
| C3   | C2   | C7   | 110.5(2)   |
| N1   | C2   | C3   | 110.3(2)   |

| Atom | Atom | Atom | Angle/°    |
|------|------|------|------------|
| P2   | N10  | C46  | 117.13(15) |
| C42  | N10  | C46  | 111.26(17) |
| P2   | N11  | C47  | 114.02(14) |
| P2   | N11  | C51  | 117.70(14) |
| C47  | N11  | C51  | 111.12(17) |
| P2   | N12  | C52  | 122.23(14) |
| P2   | N12  | C56  | 123.04(15) |
| C52  | N12  | C56  | 112.27(17) |
| Ce1  | N13  | C57  | 95.05(13)  |
| Ce1  | N13  | C58  | 139.68(14) |
| C57  | N13  | C58  | 121.73(18) |
| Ce1  | N14  | C57  | 94.80(13)  |
| Ce1  | N14  | C64  | 144.44(14) |
| C57  | N14  | C64  | 120.61(18) |
| P3   | N15  | C57  | 140.28(17) |
| P3   | N16  | C70  | 119.75(17) |
| P3   | N16  | C74  | 117.90(17) |
| C70  | N16  | C74  | 111.9(2)   |
| P3   | N17  | C75  | 117.79(17) |
| P3   | N17  | C79  | 118.17(17) |
| C75  | N17  | C79  | 111.2(2)   |
| P3   | N18A | C80A | 117.5(3)   |
| P3   | N18A | C84A | 126.8(3)   |
| C80A | N18A | C84A | 113.8(3)   |
| P3   | N18B | C84B | 122.4(3)   |
| C80B | N18B | C84B | 111.9(4)   |
| P3   | N18B | C80B | 121.0(3)   |
| Ce1  | C1   | N1   | 55.10(11)  |
| Ce1  | C1   | N2   | 56.07(11)  |
| N2   | C1   | N3   | 125.0(2)   |
| N1   | C1   | N3   | 124.8(2)   |
| Ce1  | C1   | N3   | 166.61(16) |
| N1   | C1   | N2   | 110.06(19) |
| N1   | C2   | C7   | 108.6(2)   |
| C3   | C2   | C7   | 110.5(2)   |
| N1   | C2   | C3   | 110.3(2)   |

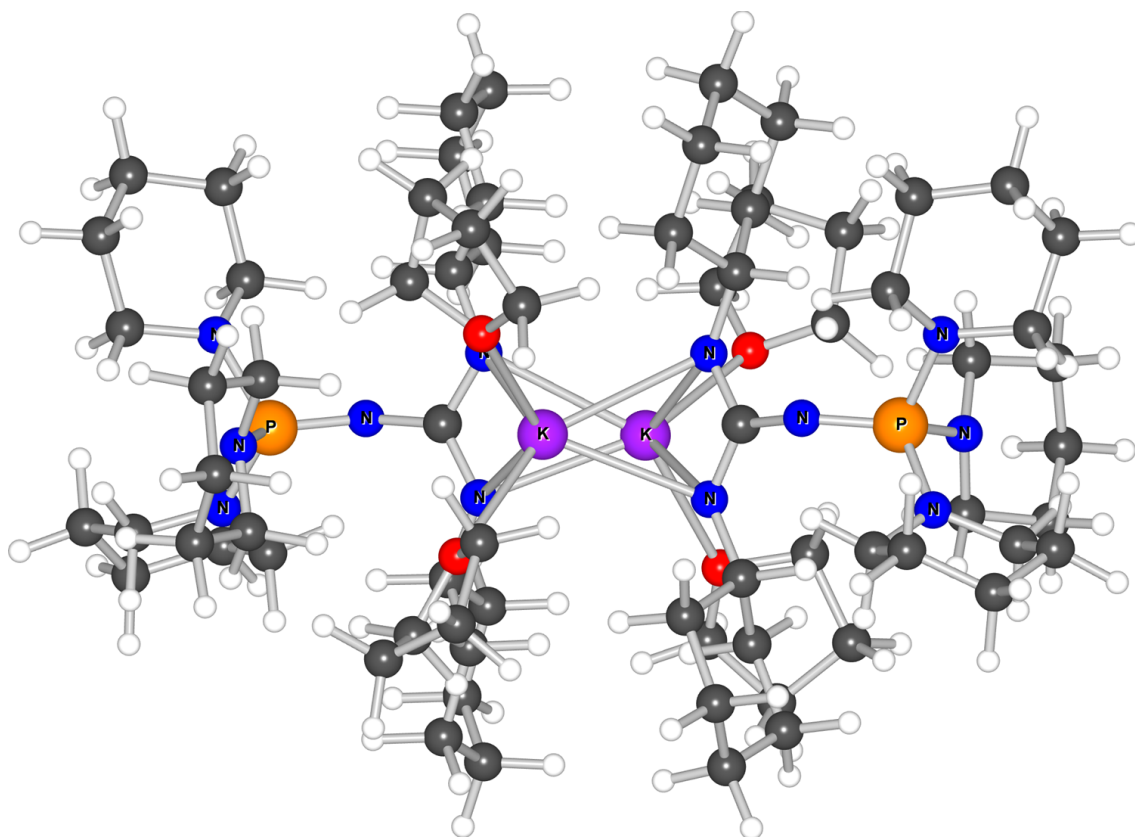

**Figure S27.** Representation of the molecular structure of **1-K** as its bis-THF adduct as determined by geometry optimization refined to match the crystal structure.

**Table S10.** Optimized atomic coordinates of **1-K**.

| 228     |              |          |          |
|---------|--------------|----------|----------|
| Energy: | -5657.450393 |          |          |
| C       | 5.45969      | 11.58311 | 7.86654  |
| N       | 4.24991      | 11.66563 | 7.10664  |
| N       | 6.03709      | 10.41201 | 8.19702  |
| N       | 6.11298      | 12.69851 | 8.25817  |
| P       | 2.73245      | 11.51915 | 7.47349  |
| C       | 10.17928     | 11.57375 | 10.71957 |
| N       | 11.13932     | 11.66987 | 11.78188 |
| N       | 9.66989      | 12.69031 | 10.15682 |
| N       | 9.67929      | 10.39081 | 10.30777 |
| P       | 12.69703     | 11.56247 | 11.89192 |
| K       | 8.66834      | 11.39955 | 7.70622  |
| K       | 7.04302      | 11.41213 | 10.67947 |
| C       | 5.63551      | 14.00203 | 7.86555  |
| H       | 4.51453      | 14.05135 | 7.87310  |
| C       | 6.13835      | 15.07951 | 8.85052  |
| H       | 7.25039      | 15.01938 | 8.90578  |

|   |          |          |         |
|---|----------|----------|---------|
| H | 5.77301  | 14.85381 | 9.87569 |
| C | 5.71878  | 16.50098 | 8.45063 |
| H | 4.60566  | 16.56997 | 8.48201 |
| H | 6.09867  | 17.2408  | 9.18794 |
| C | 6.19686  | 16.85228 | 7.03406 |
| H | 5.87230  | 17.87873 | 6.75634 |
| H | 7.31198  | 16.86274 | 7.02579 |
| C | 5.69674  | 15.81494 | 6.01959 |
| H | 6.07861  | 16.0409  | 4.99956 |
| H | 4.58581  | 15.88019 | 5.95929 |
| C | 6.10066  | 14.39033 | 6.43488 |
| H | 5.71076  | 13.63783 | 5.71704 |
| H | 7.21515  | 14.30676 | 6.42564 |
| C | 5.54549  | 9.13475  | 7.74848 |
| H | 4.42629  | 9.11353  | 7.61179 |
| C | 6.17242  | 8.70183  | 6.39464 |
| H | 7.28088  | 8.74425  | 6.51714 |
| H | 5.91616  | 9.45597  | 5.62039 |
| C | 5.76852  | 7.28290  | 5.95423 |
| H | 4.67095  | 7.24691  | 5.76561 |
| H | 6.25497  | 7.02745  | 4.98635 |
| C | 6.10883  | 6.24522  | 7.03214 |
| H | 5.78424  | 5.22591  | 6.72963 |
| H | 7.21562  | 6.19573  | 7.15784 |
| C | 5.47258  | 6.63887  | 8.37365 |
| H | 5.73490  | 5.90285  | 9.16479 |
| H | 4.36191  | 6.60087  | 8.26578 |
| C | 5.87975  | 8.05650  | 8.80178 |
| H | 5.38666  | 8.31119  | 9.76096 |
| H | 6.97696  | 8.09818  | 8.99924 |
| C | 2.34767  | 13.85722 | 6.08237 |
| H | 3.44529  | 13.72692 | 5.99039 |
| H | 1.88367  | 13.57215 | 5.10184 |
| C | 1.99546  | 15.32213 | 6.38000 |
| H | 2.33783  | 15.9671  | 5.54275 |
| H | 2.55715  | 15.63796 | 7.28418 |
| C | 0.49829  | 15.50801 | 6.65106 |
| H | 0.27696  | 16.56301 | 6.91570 |
| H | -0.08097 | 15.28748 | 5.72482 |
| C | 0.05366  | 14.54929 | 7.76144 |
| H | -1.04528 | 14.59991 | 7.91835 |
| H | 0.54336  | 14.83006 | 8.72018 |
| C | 0.44277  | 13.10214 | 7.42125 |

|   |          |          |          |
|---|----------|----------|----------|
| H | 0.17778  | 12.43564 | 8.26519  |
| H | -0.16326 | 12.7829  | 6.53246  |
| N | 1.87600  | 12.98349 | 7.15865  |
| C | 2.39330  | 9.87872  | 9.64854  |
| H | 2.11280  | 9.14589  | 8.86912  |
| H | 3.46868  | 9.68554  | 9.89267  |
| C | 1.54356  | 9.70860  | 10.91124 |
| H | 1.70831  | 8.69328  | 11.3269  |
| H | 0.46747  | 9.77658  | 10.64021 |
| C | 1.86147  | 10.78661 | 11.95655 |
| H | 1.16984  | 10.70047 | 12.8203  |
| H | 2.89422  | 10.64756 | 12.35494 |
| C | 1.74528  | 12.18019 | 11.32542 |
| H | 2.05855  | 12.96837 | 12.04054 |
| H | 0.67948  | 12.37863 | 11.07328 |
| C | 2.59491  | 12.28397 | 10.05747 |
| H | 2.46050  | 13.26444 | 9.56037  |
| H | 3.67823  | 12.19728 | 10.31902 |
| N | 2.23421  | 11.23065 | 9.09274  |
| C | 10.10433 | 13.98407 | 10.62849 |
| H | 11.07802 | 13.88507 | 11.17355 |
| C | 10.32642 | 14.97462 | 9.47172  |
| H | 9.37633  | 15.07869 | 8.89497  |
| H | 11.07451 | 14.53432 | 8.77602  |
| C | 10.7934  | 16.35526 | 9.95600  |
| H | 11.79542 | 16.24741 | 10.42851 |
| H | 10.91793 | 17.05297 | 9.09955  |
| C | 9.82047  | 16.95525 | 10.98555 |
| H | 10.2064  | 17.92814 | 11.36171 |
| H | 8.85846  | 17.18873 | 10.47276 |
| C | 9.55631  | 15.9844  | 12.14573 |
| H | 8.79884  | 16.41742 | 12.83812 |
| H | 10.49062 | 15.87208 | 12.73757 |
| C | 9.11139  | 14.60126 | 11.64716 |
| H | 9.02533  | 13.87938 | 12.48707 |
| H | 8.11215  | 14.67854 | 11.16422 |
| C | 10.18735 | 9.14282  | 10.82261 |
| H | 11.19668 | 9.28542  | 11.28864 |
| C | 9.29690  | 8.54274  | 11.94651 |
| H | 8.25515  | 8.45185  | 11.56429 |
| H | 9.27930  | 9.27061  | 12.78685 |
| C | 9.77813  | 7.16592  | 12.43678 |
| H | 10.75564 | 7.27361  | 12.95953 |

|   |          |          |          |
|---|----------|----------|----------|
| H | 9.07400  | 6.75442  | 13.19515 |
| C | 9.94910  | 6.16828  | 11.28525 |
| H | 10.34366 | 5.19765  | 11.65752 |
| H | 8.95312  | 5.94568  | 10.83791 |
| C | 10.86309 | 6.74124  | 10.19051 |
| H | 10.94294 | 6.02478  | 9.34434  |
| H | 11.89101 | 6.86197  | 10.60473 |
| C | 10.3518  | 8.10163  | 9.69535  |
| H | 11.04701 | 8.52350  | 8.93678  |
| H | 9.36947  | 7.96194  | 9.18374  |
| C | 12.27654 | 9.57889  | 13.76224 |
| H | 11.29571 | 10.08088 | 13.66097 |
| H | 12.12091 | 8.51752  | 13.45051 |
| C | 12.79877 | 9.58208  | 15.20592 |
| H | 12.07475 | 9.04725  | 15.85714 |
| H | 12.86062 | 10.62706 | 15.5825  |
| C | 14.18187 | 8.92069  | 15.27915 |
| H | 14.58483 | 8.96897  | 16.31275 |
| H | 14.08619 | 7.83923  | 15.03151 |
| C | 15.1469  | 9.60620  | 14.30447 |
| H | 16.12322 | 9.07774  | 14.26373 |
| H | 15.34616 | 10.6393  | 14.66055 |
| C | 14.56527 | 9.67497  | 12.88349 |
| H | 15.22047 | 10.28289 | 12.22956 |
| H | 14.55463 | 8.63930  | 12.45535 |
| N | 13.21154 | 10.22171 | 12.83973 |
| C | 12.538   | 13.68553 | 13.62314 |
| H | 11.46743 | 13.54219 | 13.3738  |
| H | 12.70084 | 13.22656 | 14.63475 |
| C | 12.92142 | 15.16765 | 13.70733 |
| H | 12.33524 | 15.64479 | 14.52092 |
| H | 12.62523 | 15.67603 | 12.76339 |
| C | 14.4264  | 15.34455 | 13.95667 |
| H | 14.70124 | 16.41951 | 13.92645 |
| H | 14.66065 | 14.98772 | 14.98458 |
| C | 15.24272 | 14.53599 | 12.94263 |
| H | 16.32949 | 14.57805 | 13.16717 |
| H | 15.1095  | 14.97262 | 11.92883 |
| C | 14.78071 | 13.0734  | 12.91388 |
| H | 15.33203 | 12.4878  | 12.15147 |
| H | 15.01584 | 12.60871 | 13.90767 |
| N | 13.34879 | 12.98856 | 12.6221  |
| C | 13.73181 | 10.16397 | 9.75840  |

|   |          |          |          |
|---|----------|----------|----------|
| H | 13.58101 | 9.31549  | 10.44888 |
| H | 12.89396 | 10.13947 | 9.01618  |
| C | 15.06259 | 10.03226 | 9.00132  |
| H | 15.07419 | 9.08125  | 8.42732  |
| H | 15.89218 | 9.99512  | 9.74056  |
| C | 15.26789 | 11.23229 | 8.06371  |
| H | 16.23814 | 11.16462 | 7.52876  |
| H | 14.47207 | 11.21398 | 7.28424  |
| C | 15.15112 | 12.54686 | 8.85085  |
| H | 15.21813 | 13.41761 | 8.16563  |
| H | 15.98735 | 12.6186  | 9.58001  |
| C | 13.82258 | 12.59135 | 9.61883  |
| H | 13.7301  | 13.50835 | 10.22985 |
| H | 12.97579 | 12.60213 | 8.88739  |
| N | 13.70291 | 11.42582 | 10.50662 |
| C | 2.70045  | 9.54687  | 5.54103  |
| H | 3.72509  | 9.95933  | 5.48880  |
| H | 2.80499  | 8.46915  | 5.81567  |
| C | 1.99606  | 9.65010  | 4.18084  |
| H | 2.55289  | 9.03289  | 3.44426  |
| H | 2.04550  | 10.70258 | 3.81946  |
| C | 0.53432  | 9.19663  | 4.27925  |
| H | 0.00229  | 9.34234  | 3.31590  |
| H | 0.50369  | 8.10220  | 4.48532  |
| C | -0.18518 | 9.95096  | 5.40289  |
| H | -1.22051 | 9.57176  | 5.54313  |
| H | -0.27235 | 11.02505 | 5.12715  |
| C | 0.57916  | 9.85589  | 6.73200  |
| H | 0.09498  | 10.48656 | 7.50114  |
| H | 0.52015  | 8.80063  | 7.10693  |
| N | 1.98136  | 10.24921 | 6.59841  |
| C | 4.93951  | 13.8276  | 12.7899  |
| H | 4.01422  | 13.34499 | 13.19453 |
| H | 4.82419  | 13.9142  | 11.69021 |
| C | 5.22625  | 15.15288 | 13.49285 |
| H | 5.92038  | 15.76126 | 12.87407 |
| H | 4.31388  | 15.75369 | 13.67725 |
| C | 5.91008  | 14.65878 | 14.77435 |
| H | 5.14181  | 14.33331 | 15.50606 |
| H | 6.54692  | 15.42016 | 15.26644 |
| C | 6.71549  | 13.44819 | 14.27239 |
| H | 7.76759  | 13.71086 | 14.03335 |
| H | 6.74406  | 12.62295 | 15.02059 |

|   |          |          |          |
|---|----------|----------|----------|
| O | 6.08083  | 13.00255 | 13.05779 |
| C | 4.99365  | 8.24018  | 12.40598 |
| H | 5.68165  | 7.46697  | 11.98544 |
| H | 4.15680  | 8.37315  | 11.68785 |
| C | 4.52781  | 7.87028  | 13.81645 |
| H | 3.57936  | 8.39339  | 14.06136 |
| H | 4.36656  | 6.78068  | 13.93975 |
| C | 5.67942  | 8.41983  | 14.66696 |
| H | 6.52496  | 7.69935  | 14.66915 |
| H | 5.40974  | 8.61006  | 15.72414 |
| C | 6.04580  | 9.70463  | 13.91505 |
| H | 5.47172  | 10.57858 | 14.29496 |
| H | 7.12901  | 9.94199  | 13.98198 |
| O | 5.69054  | 9.48852  | 12.5367  |
| C | 9.81208  | 13.74472 | 4.87057  |
| H | 8.70438  | 13.70402 | 4.90774  |
| H | 10.13071 | 13.55321 | 3.81569  |
| C | 10.39383 | 15.05629 | 5.39851  |
| H | 10.38283 | 15.86971 | 4.64664  |
| H | 9.81942  | 15.38586 | 6.28909  |
| C | 11.80718 | 14.62241 | 5.81290  |
| H | 12.22866 | 15.26009 | 6.61532  |
| H | 12.51053 | 14.66019 | 4.95478  |
| C | 11.59146 | 13.16811 | 6.28194  |
| H | 12.40241 | 12.48921 | 5.93342  |
| H | 11.53377 | 13.0886  | 7.39217  |
| O | 10.32374 | 12.73692 | 5.75130  |
| C | 9.65157  | 8.16185  | 5.19345  |
| H | 9.78577  | 8.42850  | 4.11353  |
| H | 8.61296  | 7.80582  | 5.33695  |
| C | 10.74183 | 7.17936  | 5.63643  |
| H | 10.41487 | 6.63903  | 6.54751  |
| H | 10.97504 | 6.42611  | 4.85924  |
| C | 11.92632 | 8.12579  | 5.95151  |
| H | 12.69442 | 8.10586  | 5.15175  |
| H | 12.43568 | 7.85160  | 6.89600  |
| C | 11.26279 | 9.52402  | 6.03868  |
| H | 11.51331 | 10.07121 | 6.97107  |
| H | 11.55255 | 10.164   | 5.17123  |
| O | 9.84990  | 9.30690  | 6.02010  |



## References

1. T. P. Gompa, N. T. Rice, D. R. Russo, L. M. Aguirre Quintana, B. J. Yik, J. Bacsa and H. S. La Pierre, Diethyl Ether Adducts of Trivalent Lanthanide Iodides, *Dalton Trans.*, 2019, **48**, 8030-8033.
2. N. T. Rice, J. Su, T. P. Gompa, D. R. Russo, J. Telser, L. Palatinus, J. Bacsa, P. Yang, E. R. Batista and H. S. La Pierre, Homoleptic Imidophosphorane Stabilization of Tetravalent Cerium, *Inorg. Chem.*, 2019, **58**, 5289-5304.
3. G. R. Fulmer, A. J. M. Miller, N. H. Sherden, H. E. Gottlieb, A. Nudelman, B. M. Stoltz, J. E. Bercaw and K. I. Goldberg, NMR Chemical Shifts of Trace Impurities: Common Laboratory Solvents, Organics, and Gases in Deuterated Solvents Relevant to the Organometallic Chemist, *Organometallics*, 2010, **29**, 2176-2179.
4. B. Ravel and M. Newville, ATHENA, ARTEMIS, HEPHAESTUS: data analysis for X-ray absorption spectroscopy using IFEFFIT, *J. Synch. Rad.*, 2005, **12**, 537-541.
5. G. N. George, *EDG\_FIT*, Stanford Synchrotron Radiation Laboratory, Stanford Linear Accelerator Center: Stanford, CA.
6. O. V. Dolomanov, L. J. Bourhis, R. J. Gildea, J. A. Howard and H. Puschmann, OLEX2: a complete structure solution, refinement and analysis program, *J. App. Crystallogr.*, 2009, **42**, 339-341.
7. G. M. Sheldrick, SHELXT—Integrated space-group and crystal-structure determination, *Acta Crystallogr. A*, 2015, **71**, 3-8.
8. G. M. Sheldrick, Crystal structure refinement with SHELXL, *Acta Crystallogr. C*, 2015, **71**, 3-8.
9. C. F. Macrae, I. Sovago, S. J. Cottrell, P. T. Galek, P. McCabe, E. Pidcock, M. Platings, G. P. Shields, J. S. Stevens and M. Towler, Mercury 4.0: from visualization to analysis, design and prediction, *J. App. Crystallogr.*, 2020.
10. Persistence of Vision Pty. Ltd. (2004) Persistence of Vision Raytracer (Version 3.6). Retrieved from <http://www.povray.org/download/>
11. F. Neese, Software update: the ORCA program system, version 4.0, *WIREs Computational Molecular Science*, 2018, **8**, e1327.
